# Supplementary material for: Palladium catalyzed acetoxylation of benzylic C–H bonds using a bidentate picolinamide directing group
Source: Royal Society of Chemistry journal article supplement (doi:10.1039/c3ob42196a), 2013-12-20

# Palladium Catalyzed Acetoxylation of Benzylic C-H Bonds Using a Bidentate Picolinamide Directing Group

Tao Cheng,<sup>a</sup> Weiyu Yin,<sup>a</sup> Yi Zhang,<sup>a</sup> Yingnan Zhang<sup>b</sup> and Yong Huang<sup>a,\*</sup>

<sup>a</sup>Key Laboratory of Chemical Genomics, School of Chemical Biology and Biotechnology  
Peking University, Shenzhen Graduate School, Shenzhen, 518055, China

<sup>b</sup>Division of Food-borne Diseases Surveillance, China National Center for Food Safety Risk Assessment,  
Building 2, Guangqu Road 37, Beijing, 100022, China

## Support Information

### Table of Contents:

---

|                                                       |      |
|-------------------------------------------------------|------|
| Comprehensive Condition Survey                        | 2    |
| Procedure and Raw Data of the Kinetic Study           | 3-6  |
| NMR Spectra Images of Starting Materials and Products | 7-90 |

---

## Condition screening

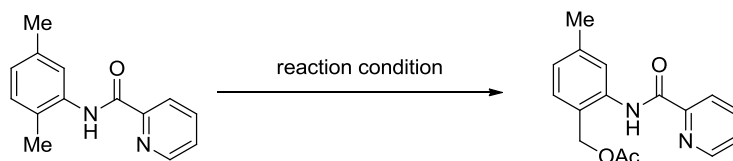

| entry     | cat                                                                       | solvent                     | T (°C)     | additive                        | time (h)  | conv. (%) <sup>b</sup> |
|-----------|---------------------------------------------------------------------------|-----------------------------|------------|---------------------------------|-----------|------------------------|
| 1         | --                                                                        | DCE                         | 110        | --                              | 24        | N.R.                   |
| 2         | Fe(acac) <sub>3</sub>                                                     | DCE                         | 110        | --                              | 24        | N.R.                   |
| 3         | Ni(acac) <sub>2</sub>                                                     | DCE                         | 110        | --                              | 24        | N.R.                   |
| 4         | Cp(Ph <sub>3</sub> P) <sub>2</sub> RuCl                                   | DCE                         | 110        | --                              | 24        | N.R.                   |
| 5         | [RhCp*Cl <sub>2</sub> ] <sub>2</sub>                                      | DCE                         | 110        | --                              | 24        | N.R.                   |
| 6         | [Cp*Rh(CH <sub>3</sub> CN) <sub>3</sub> ](SbF <sub>6</sub> ) <sub>2</sub> | DCE                         | 110        | --                              | 24        | N.R.                   |
| 7         | [Ir(OCH <sub>3</sub> )(C <sub>8</sub> H <sub>12</sub> ) <sub>2</sub> ]    | DCE                         | 110        | --                              | 24        | N.R.                   |
| 8         | [Rh(OAc) <sub>2</sub> ] <sub>2</sub>                                      | DCE                         | 110        | --                              | 24        | N.R.                   |
| 9         | Pd(OAc) <sub>2</sub>                                                      | DCE                         | 110        | --                              | 24        | 40                     |
| 11        | Pd(OAc) <sub>2</sub>                                                      | Toluene                     | 110        | --                              | 24        | 50                     |
| 12        | Pd(OAc) <sub>2</sub>                                                      | DMF                         | 110        | --                              | 24        | 25                     |
| 13        | Pd(OAc) <sub>2</sub>                                                      | PivOH                       | 110        | --                              | 24        | 30                     |
| 14        | Pd(OAc) <sub>2</sub>                                                      | Toluene/HOAc<br>(1ml/0.2ml) | 110        | --                              | 24        | 50                     |
| 15        | Pd(OAc) <sub>2</sub>                                                      | <i>t</i> -AmOH              | 110        | --                              | 24        | N.R.                   |
| 16        | Pd(OAc) <sub>2</sub>                                                      | Toluene                     | 110        | Li <sub>2</sub> CO <sub>3</sub> | 24        | 48                     |
| 17        | Pd(OAc) <sub>2</sub>                                                      | Toluene                     | 110        | KOAc                            | 24        | N.R.                   |
| 18        | Pd(OAc) <sub>2</sub>                                                      | Toluene                     | 110        | KF                              | 24        | 29                     |
| 19        | Pd(OAc) <sub>2</sub>                                                      | Toluene                     | 110        | KOH                             | 24        | N.R.                   |
| 20        | Pd(OAc) <sub>2</sub>                                                      | Toluene                     | 110        | KHCO <sub>3</sub>               | 24        | N.R.                   |
| 21        | Pd(OAc) <sub>2</sub>                                                      | Toluene                     | 110        | Na <sub>2</sub> CO <sub>3</sub> | 24        | 27                     |
| 22        | Pd(OAc) <sub>2</sub>                                                      | Toluene                     | 110        | K <sub>2</sub> CO <sub>3</sub>  | 24        | 27                     |
| 23        | Pd(OAc) <sub>2</sub>                                                      | Toluene                     | 110        | AgOTf                           | 24        | N.R.                   |
| 24        | Pd(OAc) <sub>2</sub>                                                      | Toluene                     | 110        | AgOAc                           | 24        | 36                     |
| 25        | Pd(OAc) <sub>2</sub>                                                      | Toluene                     | 110        | AgPF <sub>6</sub>               | 24        | N.R.                   |
| 26        | Pd(OAc) <sub>2</sub>                                                      | Toluene                     | 110        | AgClO <sub>4</sub>              | 24        | N.R.                   |
| 27        | Pd(OAc) <sub>2</sub>                                                      | Toluene                     | 110        | AgSbF <sub>6</sub>              | 24        | N.R.                   |
| 28        | Pd(OAc) <sub>2</sub>                                                      | Toluene                     | 130        | --                              | 24        | 52                     |
| <b>29</b> | <b>Pd(OAc)<sub>2</sub></b>                                                | <b>Toluene</b>              | <b>110</b> | --                              | <b>24</b> | <b>50</b>              |
| 30        | Pd(OAc) <sub>2</sub>                                                      | Toluene                     | 90         | --                              | 24        | 20                     |
| 31        | Pd(OAc) <sub>2</sub>                                                      | Toluene                     | 70         | --                              | 24        | N.R.                   |
| 32        | Pd(OAc) <sub>2</sub>                                                      | Toluene                     | 50         | --                              | 24        | N.R.                   |
| 33        | Pd(OAc) <sub>2</sub>                                                      | Toluene                     | 110        | --                              | 1         | 10                     |
| 34        | Pd(OAc) <sub>2</sub>                                                      | Toluene                     | 110        | --                              | 4         | 20                     |
| 35        | Pd(OAc) <sub>2</sub>                                                      | Toluene                     | 110        | --                              | 8         | 33                     |
| 36        | Pd(OAc) <sub>2</sub>                                                      | Toluene                     | 110        | --                              | 16        | 40                     |
| <b>37</b> | <b>Pd(OAc)<sub>2</sub></b>                                                | <b>Toluene</b>              | <b>110</b> | --                              | <b>48</b> | <b>72</b>              |

<sup>a</sup> Reaction condition: substrate (22.6 mg, 0.1 mmol, 1equiv.), PhI(OAc)<sub>2</sub> (64 mg, 0.2 mmol, 2 equiv.) additive (0.1 mmol, 1 equiv.) and cat. (0.01 mmol, 0.1 equiv.) were placed in a seal tube. The reaction vessel was degassed/backfilled with argon three times and the solvent (0.5 mL) was added. The reaction mixture was placed in an oil bath (T °C) and stirred for indicate time. <sup>b</sup> The conversion was calculated by GC-MS using biphenyl as internal standard. <sup>c</sup> Isolated yield.

### KIE Experiment for Isotope Effect

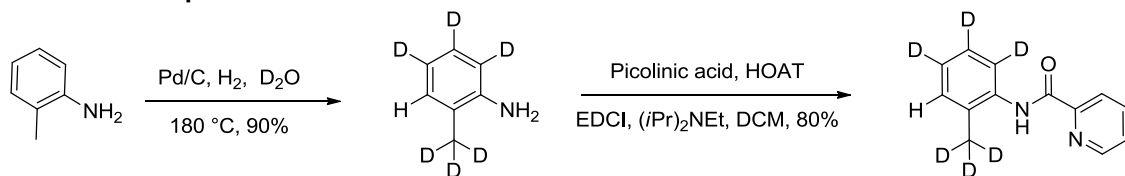

#### $d^6$ -*o*-toluidine

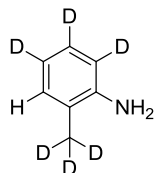

*o*-Toluidine (214 mg, 2 mmol, 1 equiv) and Pd/C (42 mg, 20% wt%) were placed in a sealed tube,  $\text{D}_2\text{O}$  (12 mL) was added. The reaction vessel was degassed and flushed with  $\text{H}_2$  three times. The tube was capped and heated to  $180^\circ\text{C}$  for 24 hour. The catalyst was by filtering through Celite. The solution was extracted with DCM. The combined organic phase was washed with brine, dried over  $\text{Na}_2\text{SO}_4$ , filtered and concentrated to give  $d^6$ -*o*-toluidine (203 mg, 90% ) as a colorless oil. The product was directly used for the next step without further purification.

#### Compound $d^6$ -**1j**

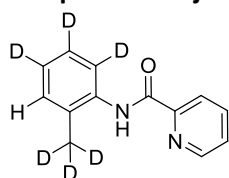

$d^6$ -*o*-toluidine ( 812 mg, 4 mmol, 1 equiv) and 2-Picolinic acid (0.73 g, 6 mmol, 1.5 equiv) were dissolved in DCM (25 mL). HOAT (0.59 g, 4.4 mmol, 1.1 equiv) and EDCI (0.84 g, 11 mmol, 1.1 equiv) were added sequentially, followed by  $(i\text{Pr})_2\text{NEt}$  (1.55 g, 12 mmol, 3 equiv). The reaction mixture was stirred at rt for 24 h. washed using sat.  $\text{NaHCO}_3$ , and extracted with DCM three times. The combined organic layer was washed with brine, dried over anhydrous  $\text{Na}_2\text{SO}_4$ , filtered and concentrated. The residue was purified by silica gel flash column chromatograph (EtOAc:Hexane = 1:10) to give compound  $d^6$ -**1j** (697 mg, 80% ).  $R_f = 0.3$  (Hexane/EtOAc = 3:1);  $^1\text{H NMR}$  (500 MHz,  $\text{CDCl}_3$ )  $\delta$  10.10 (s, 1H), 8.64 (d,  $J = 3.9$  Hz, 1H), 8.33 (d,  $J = 7.8$  Hz, 1H), 7.92 (t,  $J = 7.7$  Hz, 1H), 7.52 – 7.46 (m, 1H), 7.25 (d,  $J = 14.6$  Hz, 1H).  $^{13}\text{C NMR}$  (125 MHz,  $\text{CDCl}_3$ )  $\delta$  161.87, 150.21, 148.08, 137.59, 135.94, 130.29, 127.90, 126.63, 126.35, 124.25, 122.33, 121.06, 16.85.

#### Standard Concentration Curve of $d^6$ -**2j**

The ethanol solution (1 mL) of  $d^6$ -**2j** (0.0025 M/L, 0.05 M/L, 0.01 M/L, 0.02 M/L, 0.04 M/L) were prepared, and the absorption area of  $d^6$ -**2j** (0.0025 M/L, 0.05 M/L, 0.01 M/L, 0.02 M/L, 0.04 M/L) were measured under follow condition: Ethanol/*n*-Hexane = 40/60, flow rate = 1.0 mL/min,  $\lambda = 271$  nm, retention time: 3.6 min ( $d^6$ -**2j**).

| Concentration ( $d^6$ - <b>2j</b> ) | Absorption Area |
|-------------------------------------|-----------------|
| 0.0025                              | 783369          |
| 0.05                                | 1578382         |
| 0.01                                | 3177289         |
| 0.02                                | 6525472         |
| 0.04                                | 12895330        |

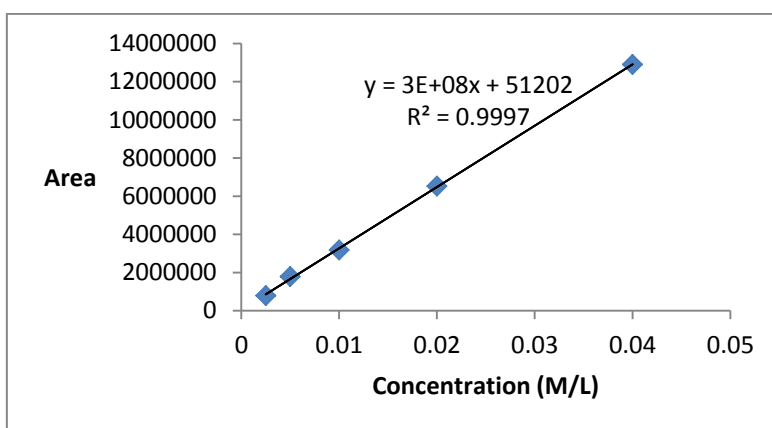

#### With **1j** as substrate

Five parallel reactions were performed side-by-side as the following: Compound **1j** (21.6 mg, 0.1 mmol, 1 equiv),  $\text{PhI}(\text{OAc})_2$  (64 mg, 0.2 mmol, 2 equiv) and  $\text{Pd}(\text{OAc})_2$  (2.3 mg, 0.01 mmol, 0.1 equiv) were weighted into a Schlenk tube, which was capped using a rubber septum. The reaction tube was degassed and backfilled with argon three times. Toluene (1 mL) was added via a syringe. The reaction mixture was stirred at 110 °C for the below indicated time. The solvent was removed under vacuum. The crude was dissolved in ethanol (1 mL). the absorption area of **2j** was determined by HPLC. And then the conversion of the acetoxylation of **1j** was calculated by comparing the absorption area with standard concentration curve.

| Time (min) | Concentration (M/L) |
|------------|---------------------|
| 5          | 0.0059              |
| 10         | 0.01                |
| 15         | 0.0158              |
| 20         | 0.02                |
| 25         | 0.024               |

#### With **d<sup>6</sup>-1j** as substrate

Three parallel reactions were performed side-by-side as the following: Compound **d<sup>6</sup>-1j** (11.4 mg, 0.05 mmol, 1 equiv),  $\text{PhI}(\text{OAc})_2$  (32 mg, 0.1 mmol, 2 equiv) and  $\text{Pd}(\text{OAc})_2$  (1.2 mg, 0.005 mmol, 0.1 equiv) were weighted into a Schlenk tube, which was capped using a rubber septum. The reaction tube was degassed and backfilled with argon three times. Toluene (1 mL) was added via a syringe. The reaction mixture was stirred at 110 °C for the below indicated time. The solvent was removed under vacuum. the crude was dissolved in ethanol (1 mL). the absorption area of **d<sup>6</sup>-2j** was determined by HPLC. And then the conversion of the acetoxylation of **d<sup>6</sup>-1j** was calculated by comparing the absorption area with standard concentration curve.

| Time (min) | Concentration (M/L) |
|------------|---------------------|
| 60         | 0.0054              |
| 120        | 0.0162              |
| 180        | 0.025               |

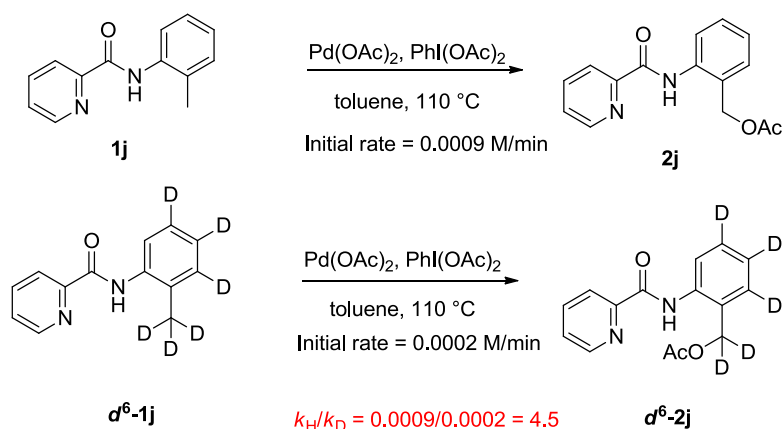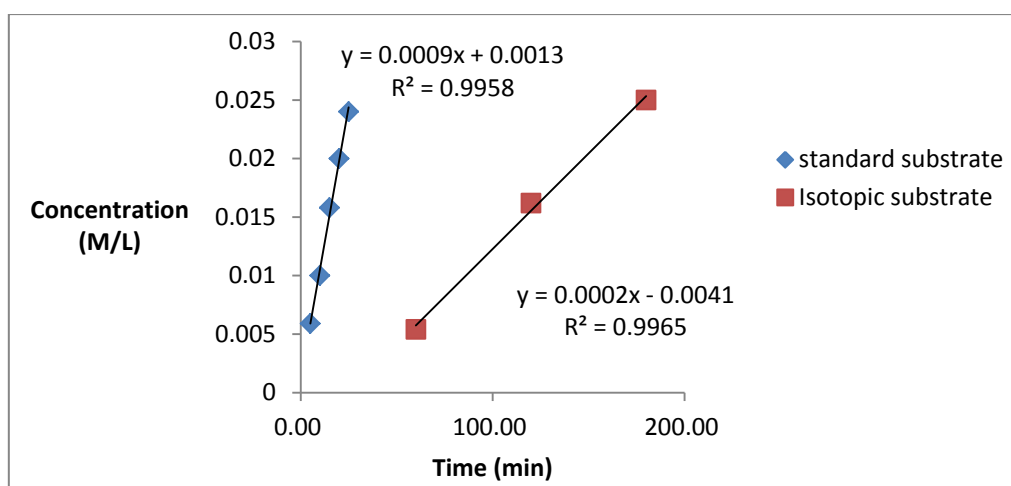

#### Rate Constants of Substrates with an Additional Methyl at Different Positions.

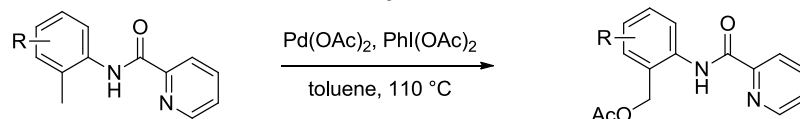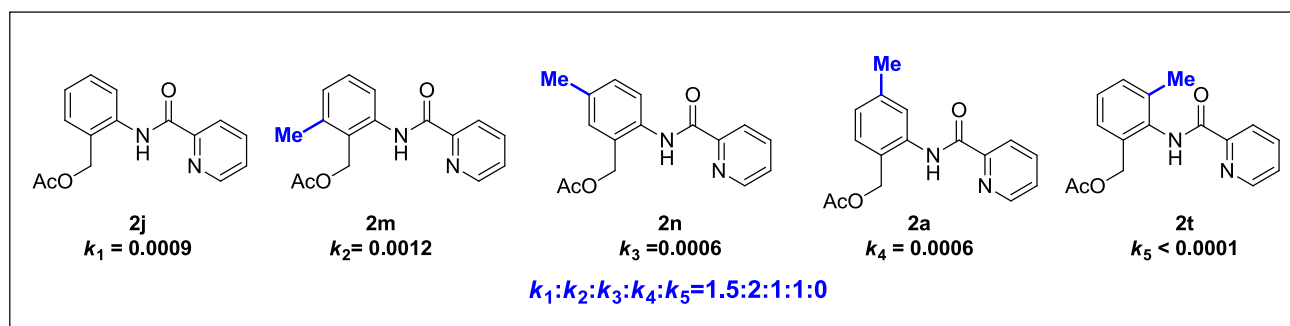

The rate constant was determined similarly as described above.

| Time (min) | Concentration (M/L) |        |        |        |      |
|------------|---------------------|--------|--------|--------|------|
|            | 2a                  | 2j     | 2m     | 2n     | 2t   |
| 5          |                     | 0.0059 |        |        | N.R. |
| 10         | 0.005               | 0.01   |        | 0.0085 | N.R. |
| 15         |                     | 0.0158 | 0.0135 | 0.011  | N.R. |
| 20         | 0.0105              | 0.02   | 0.0215 | 0.014  | N.R. |
| 25         |                     | 0.024  | 0.0255 | 0.017  | N.R. |
| 30         | 0.0165              |        | 0.0375 | 0.022  | N.R. |

|    |        |  |  |  |      |
|----|--------|--|--|--|------|
| 35 |        |  |  |  | N.R. |
| 40 | 0.021  |  |  |  | N.R. |
| 45 |        |  |  |  | N.R. |
| 50 | 0.024  |  |  |  | N.R. |
| 55 |        |  |  |  | N.R. |
| 60 | 0.0275 |  |  |  | N.R. |

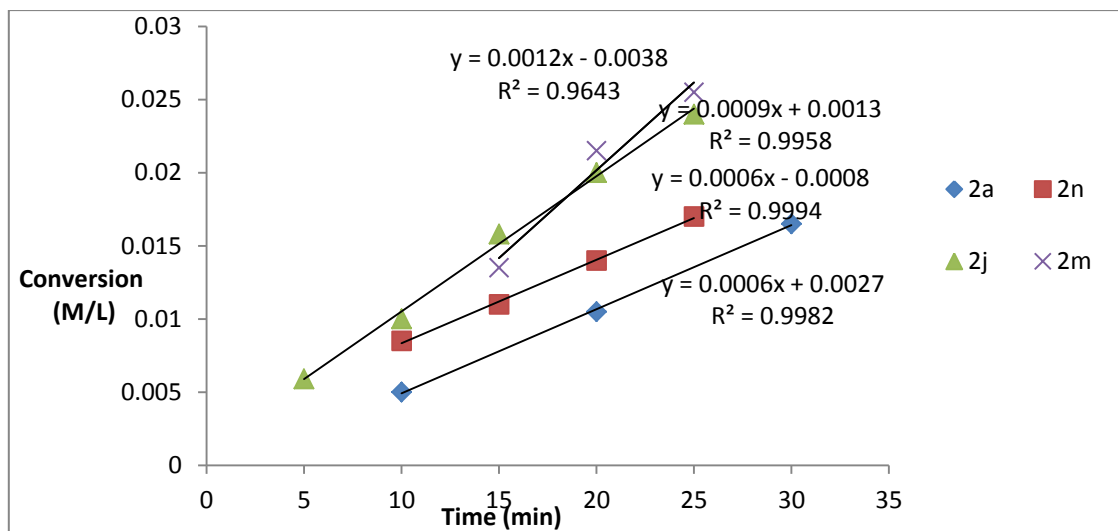

Compound 1a (300 MHz, CDCl<sub>3</sub>)

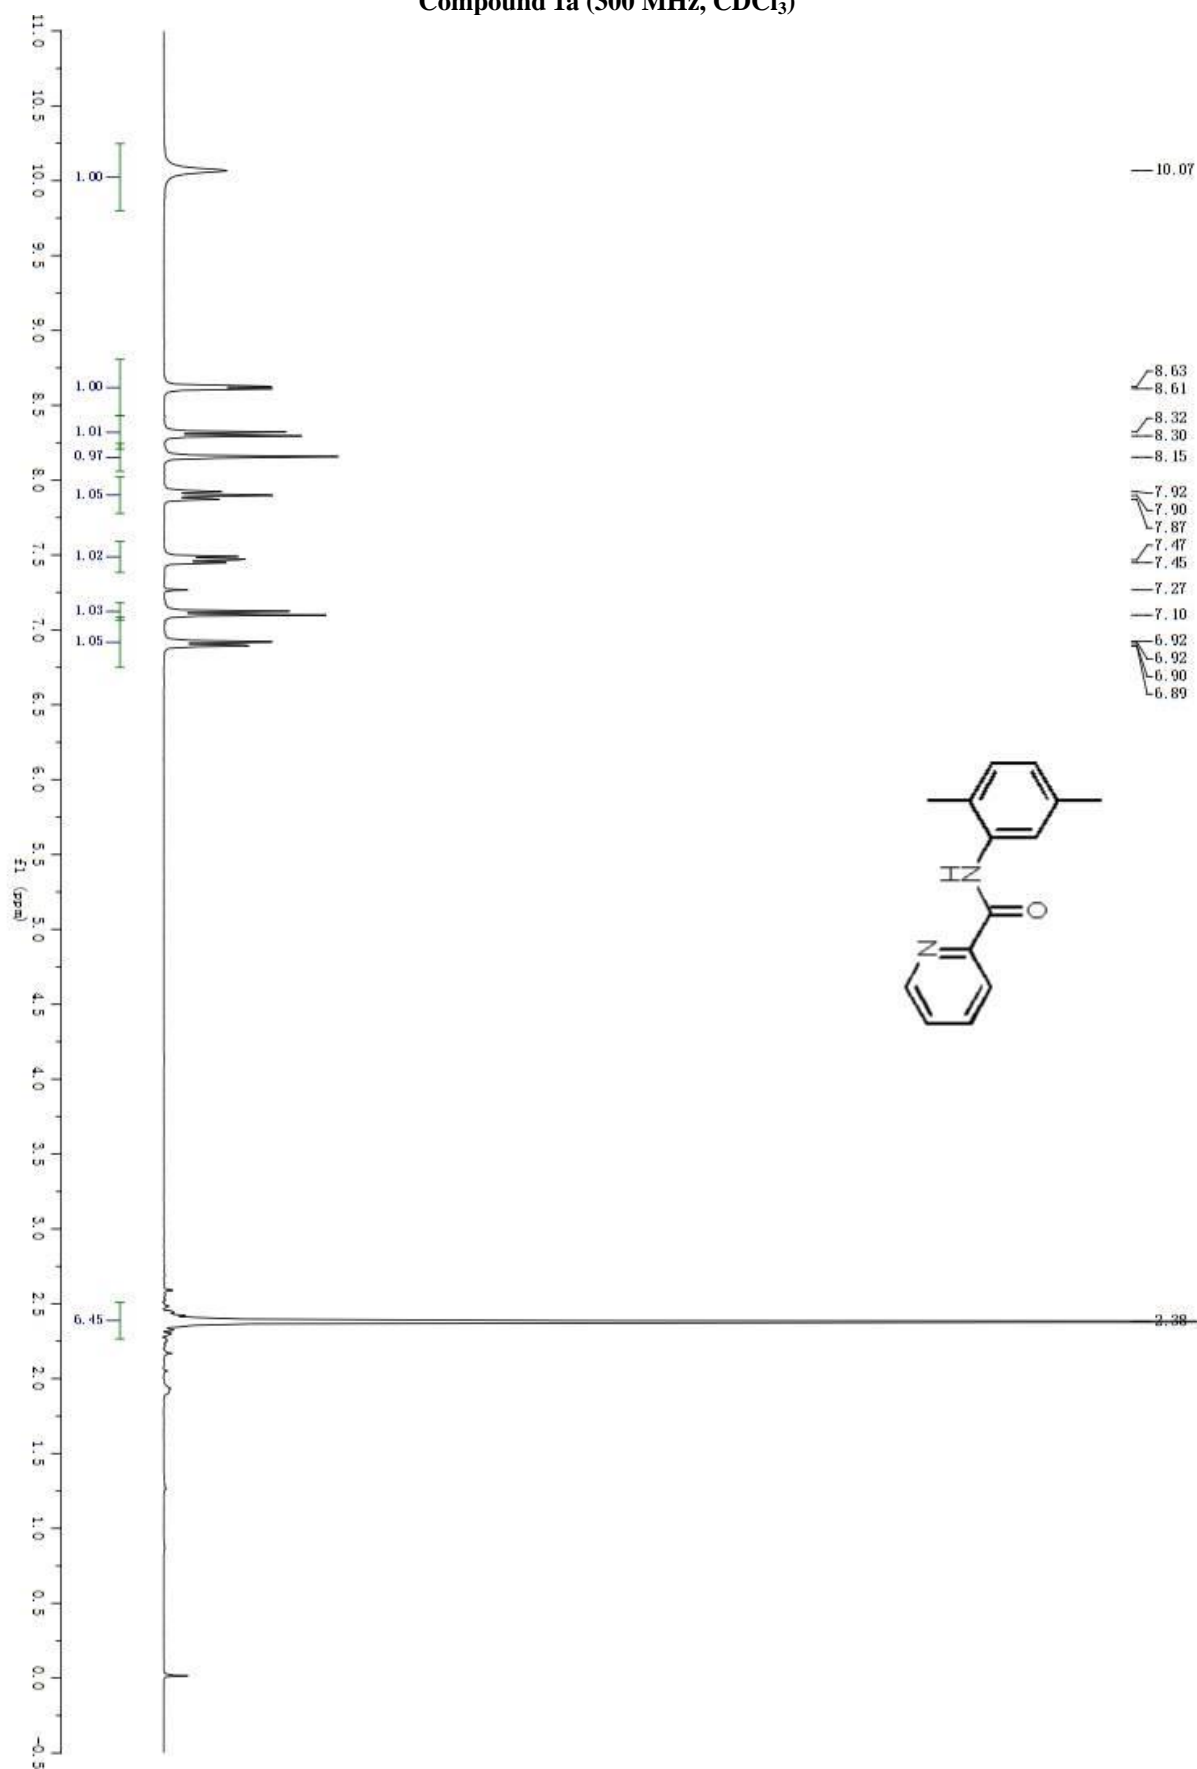

Compound 1a (75 MHz, CDCl<sub>3</sub>)

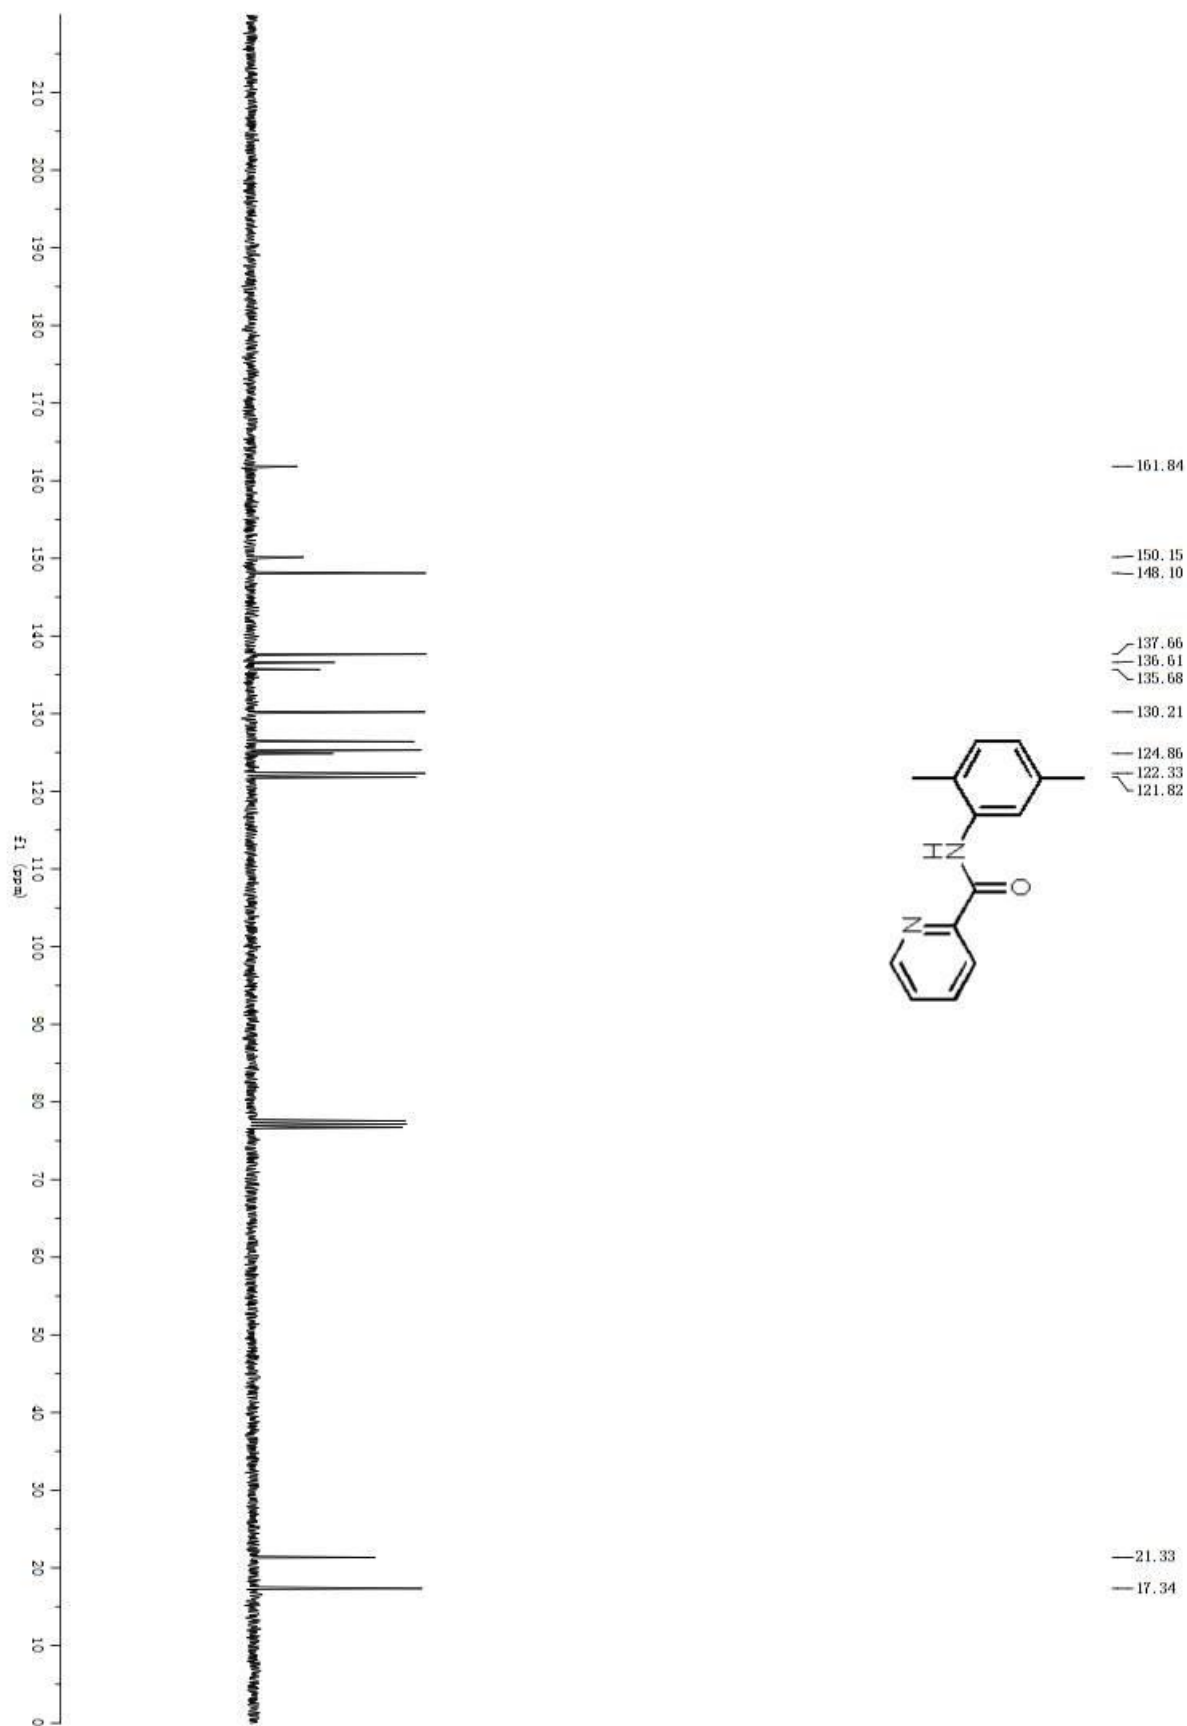



Compound 1b (300 MHz, CDCl<sub>3</sub>)

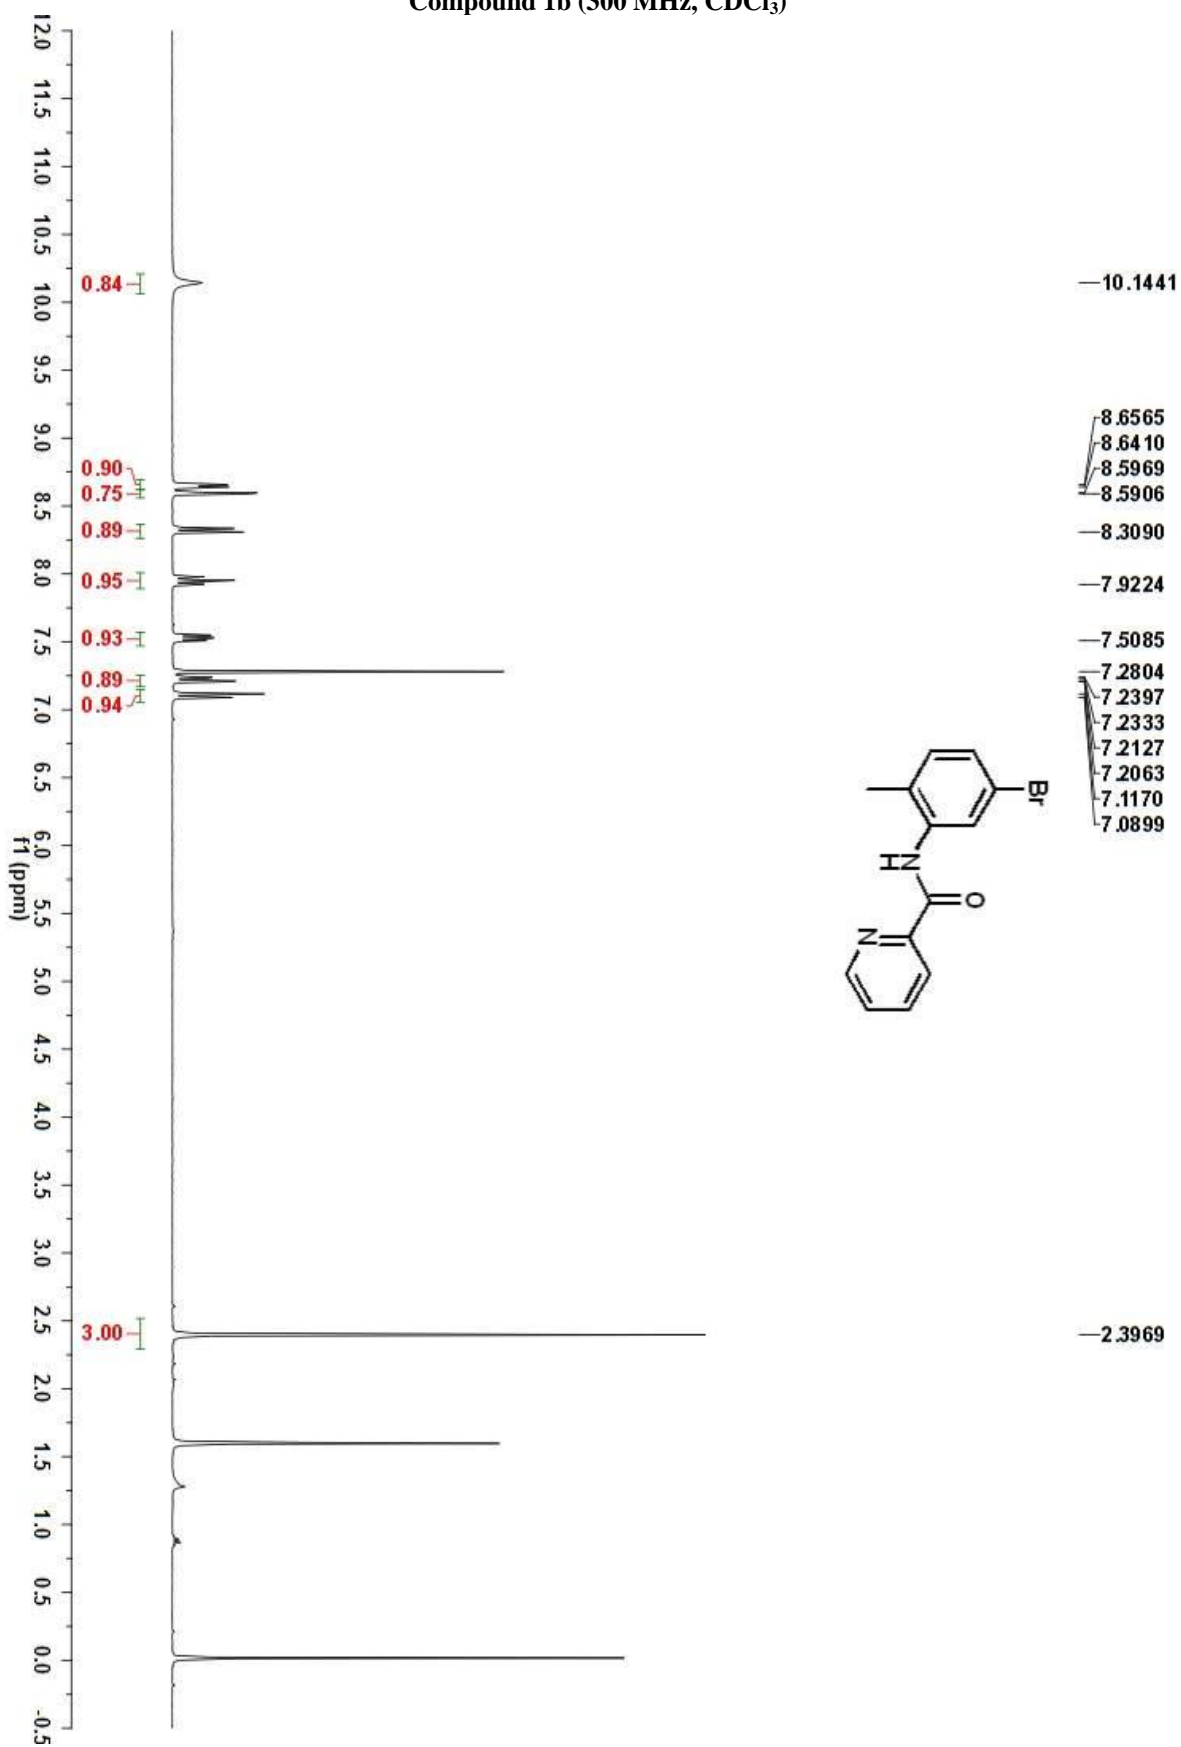

Compound 1b (75 MHz, CDCl<sub>3</sub>)

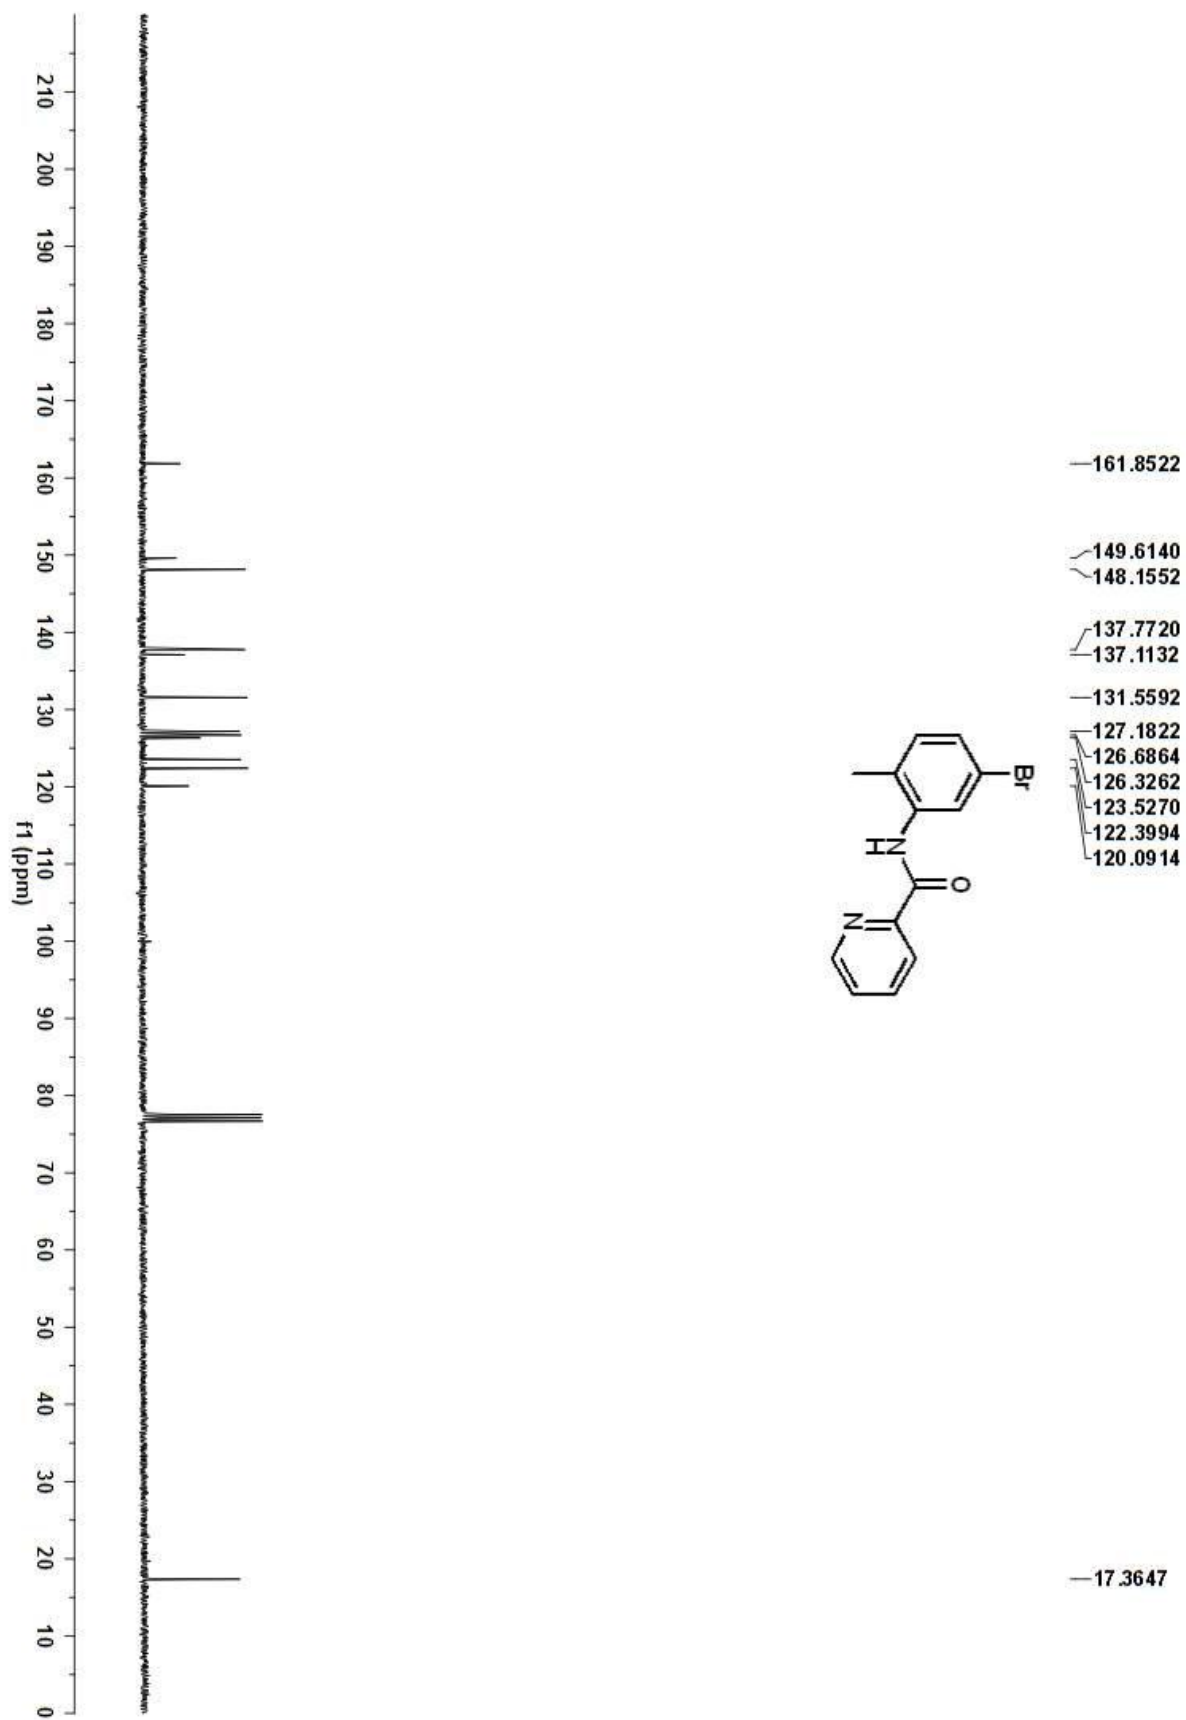

Compound 1c (300 MHz, CDCl<sub>3</sub>)

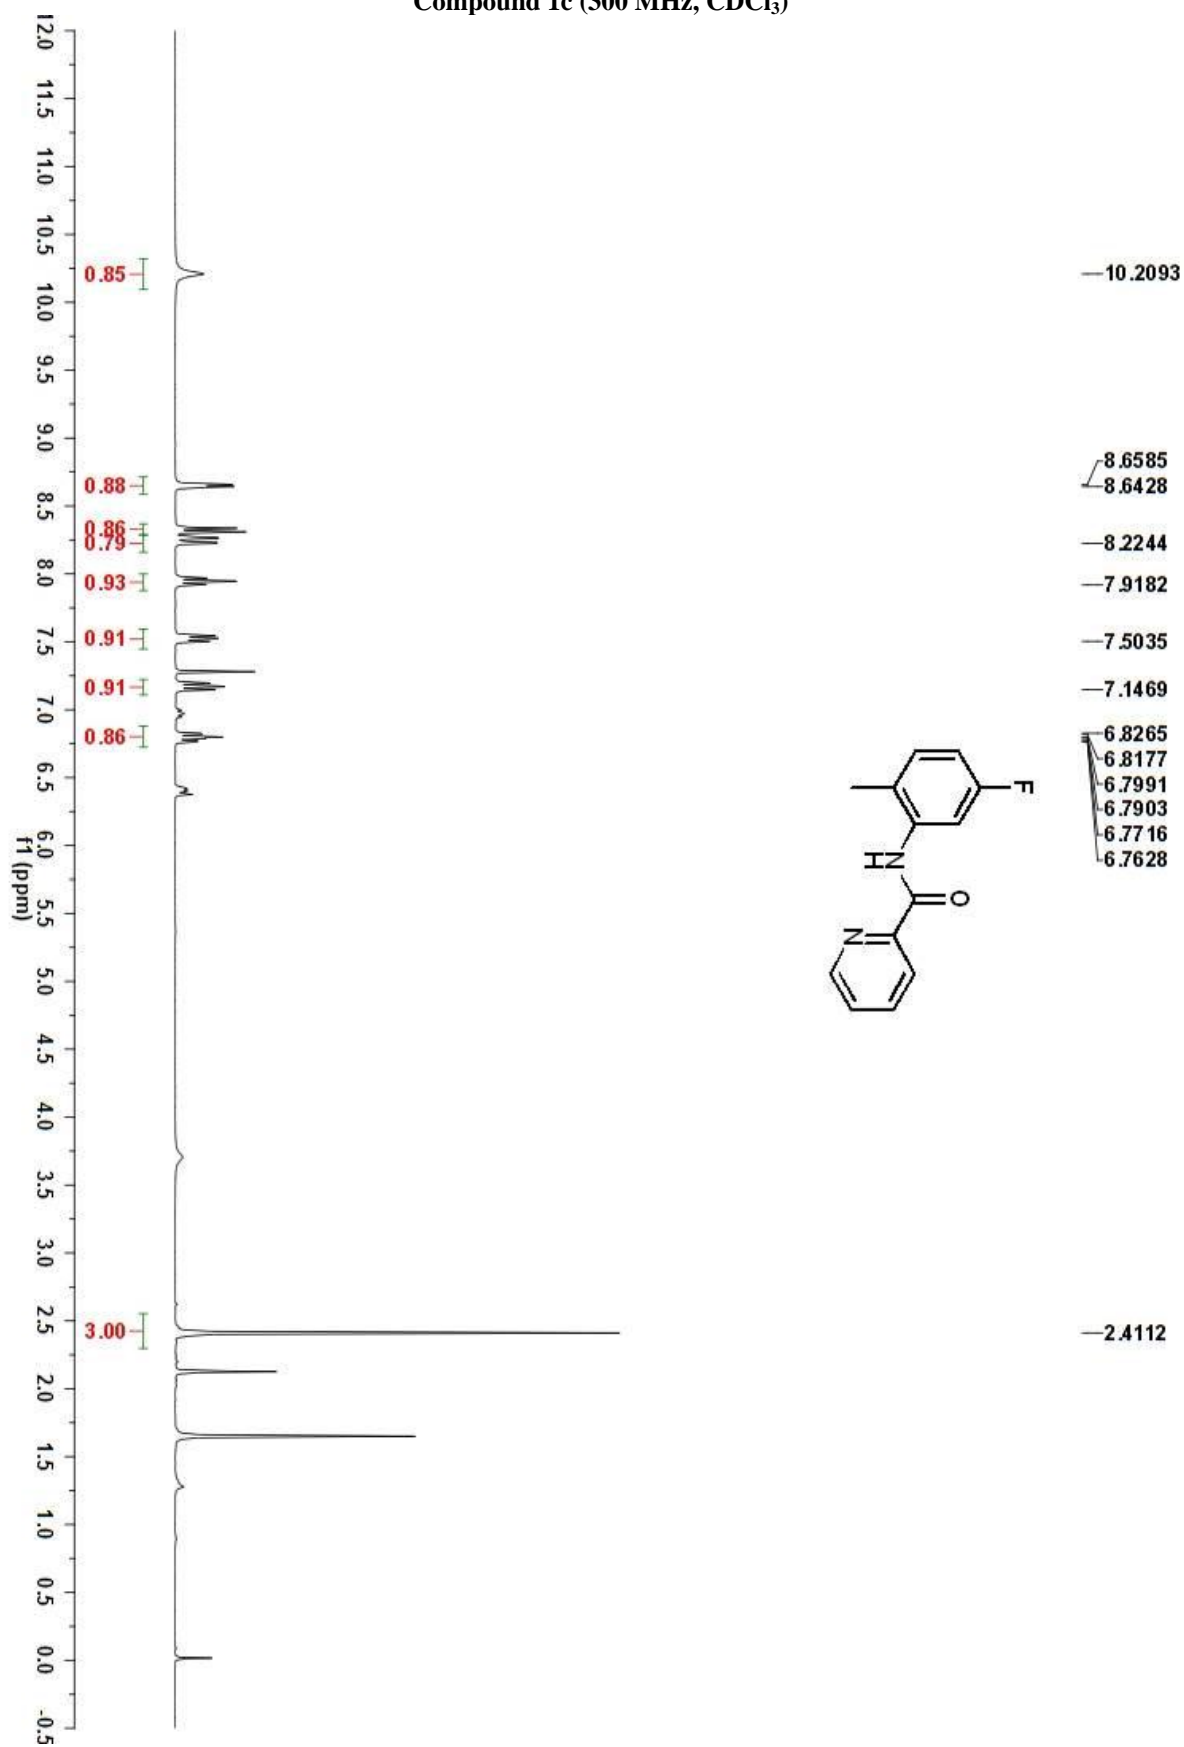

Compound 1c (75 MHz, CDCl<sub>3</sub>)

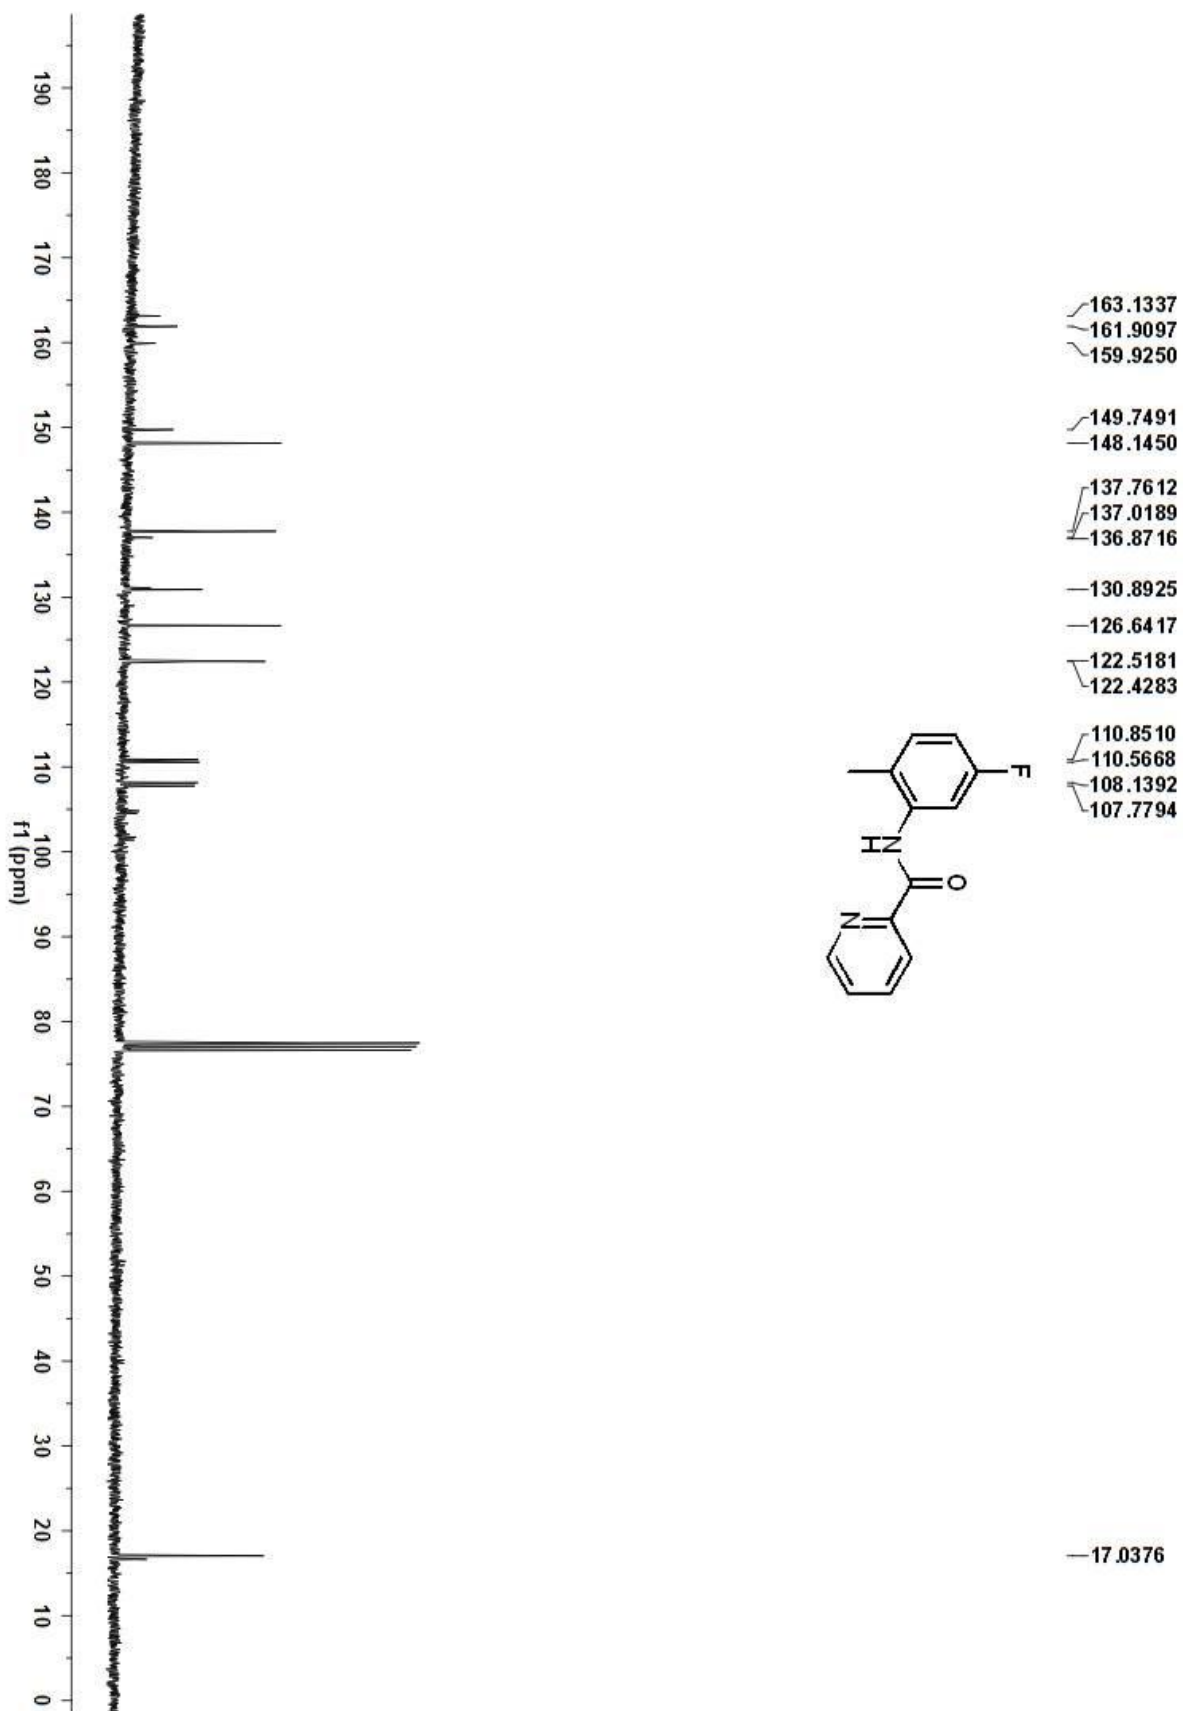

Compound 1d (300 MHz, CDCl<sub>3</sub>)

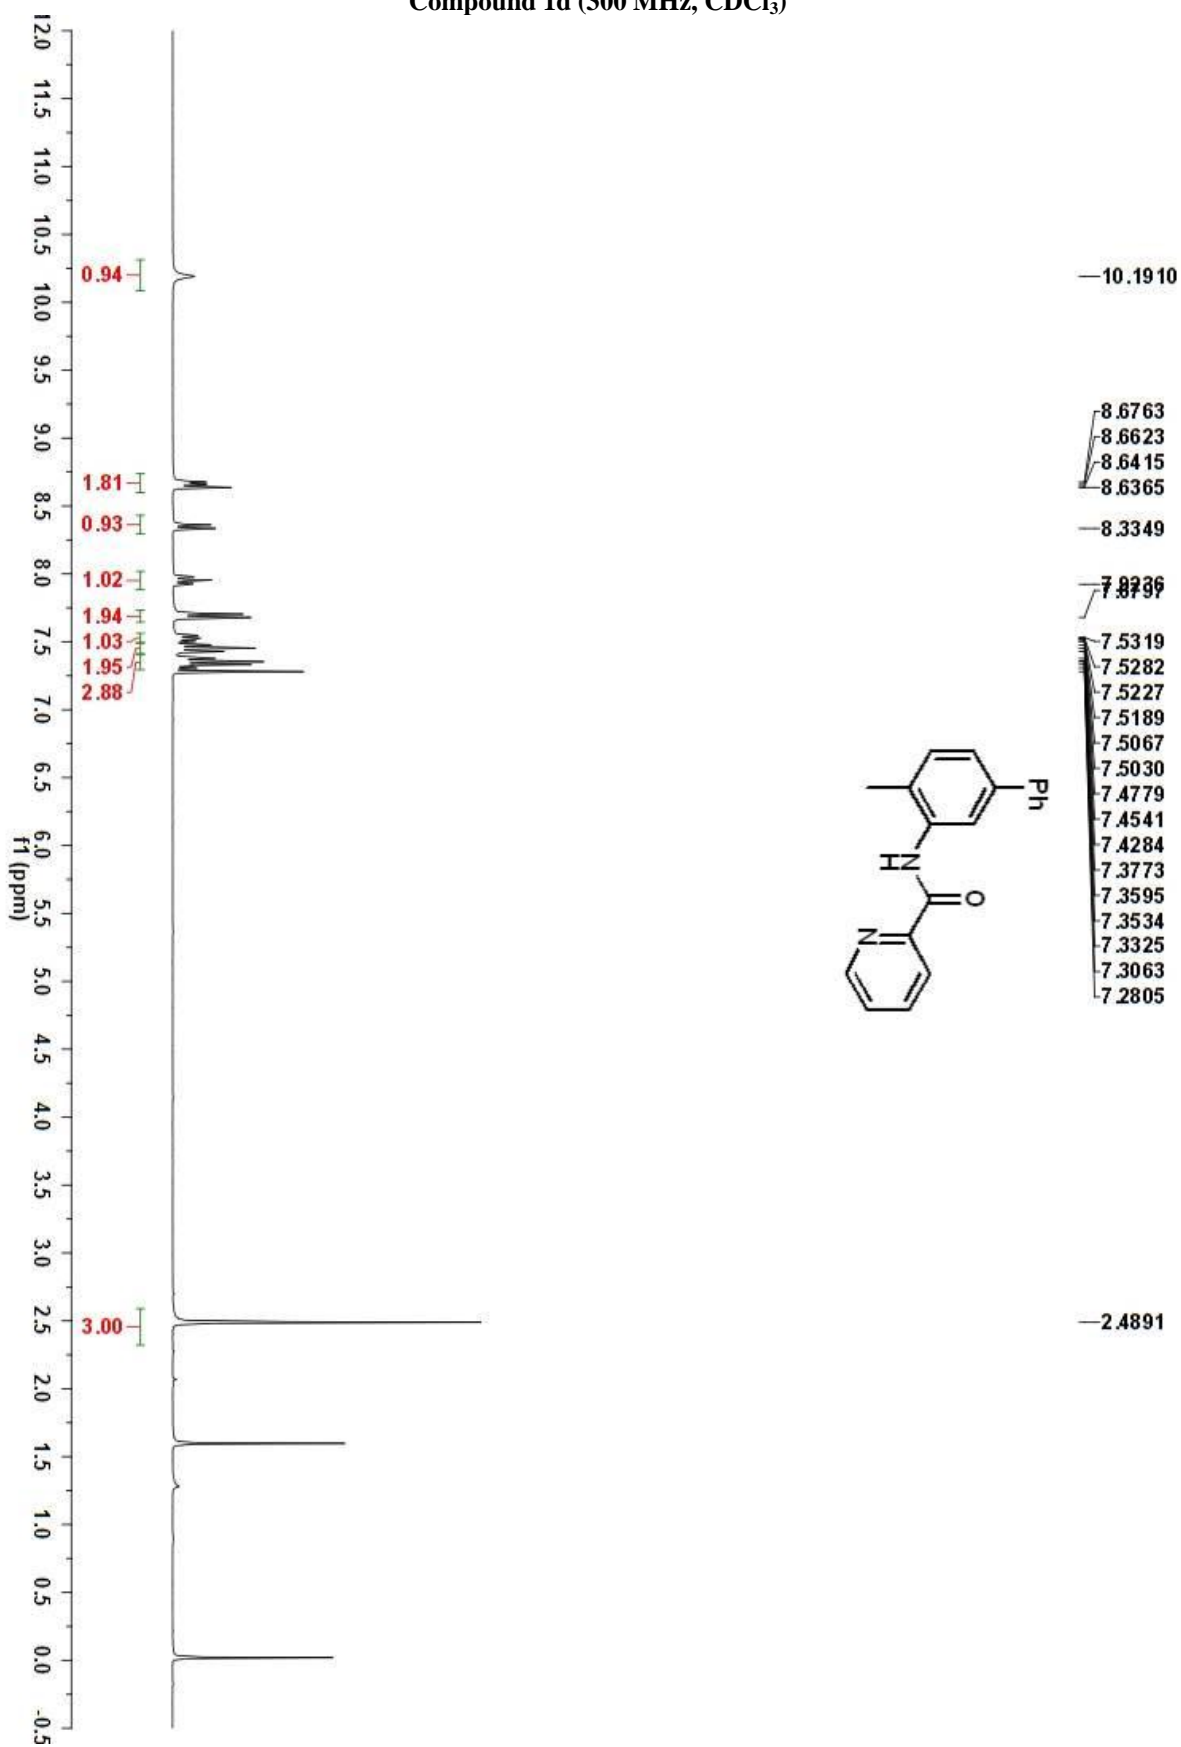

Compound 1d (75 MHz, CDCl<sub>3</sub>)

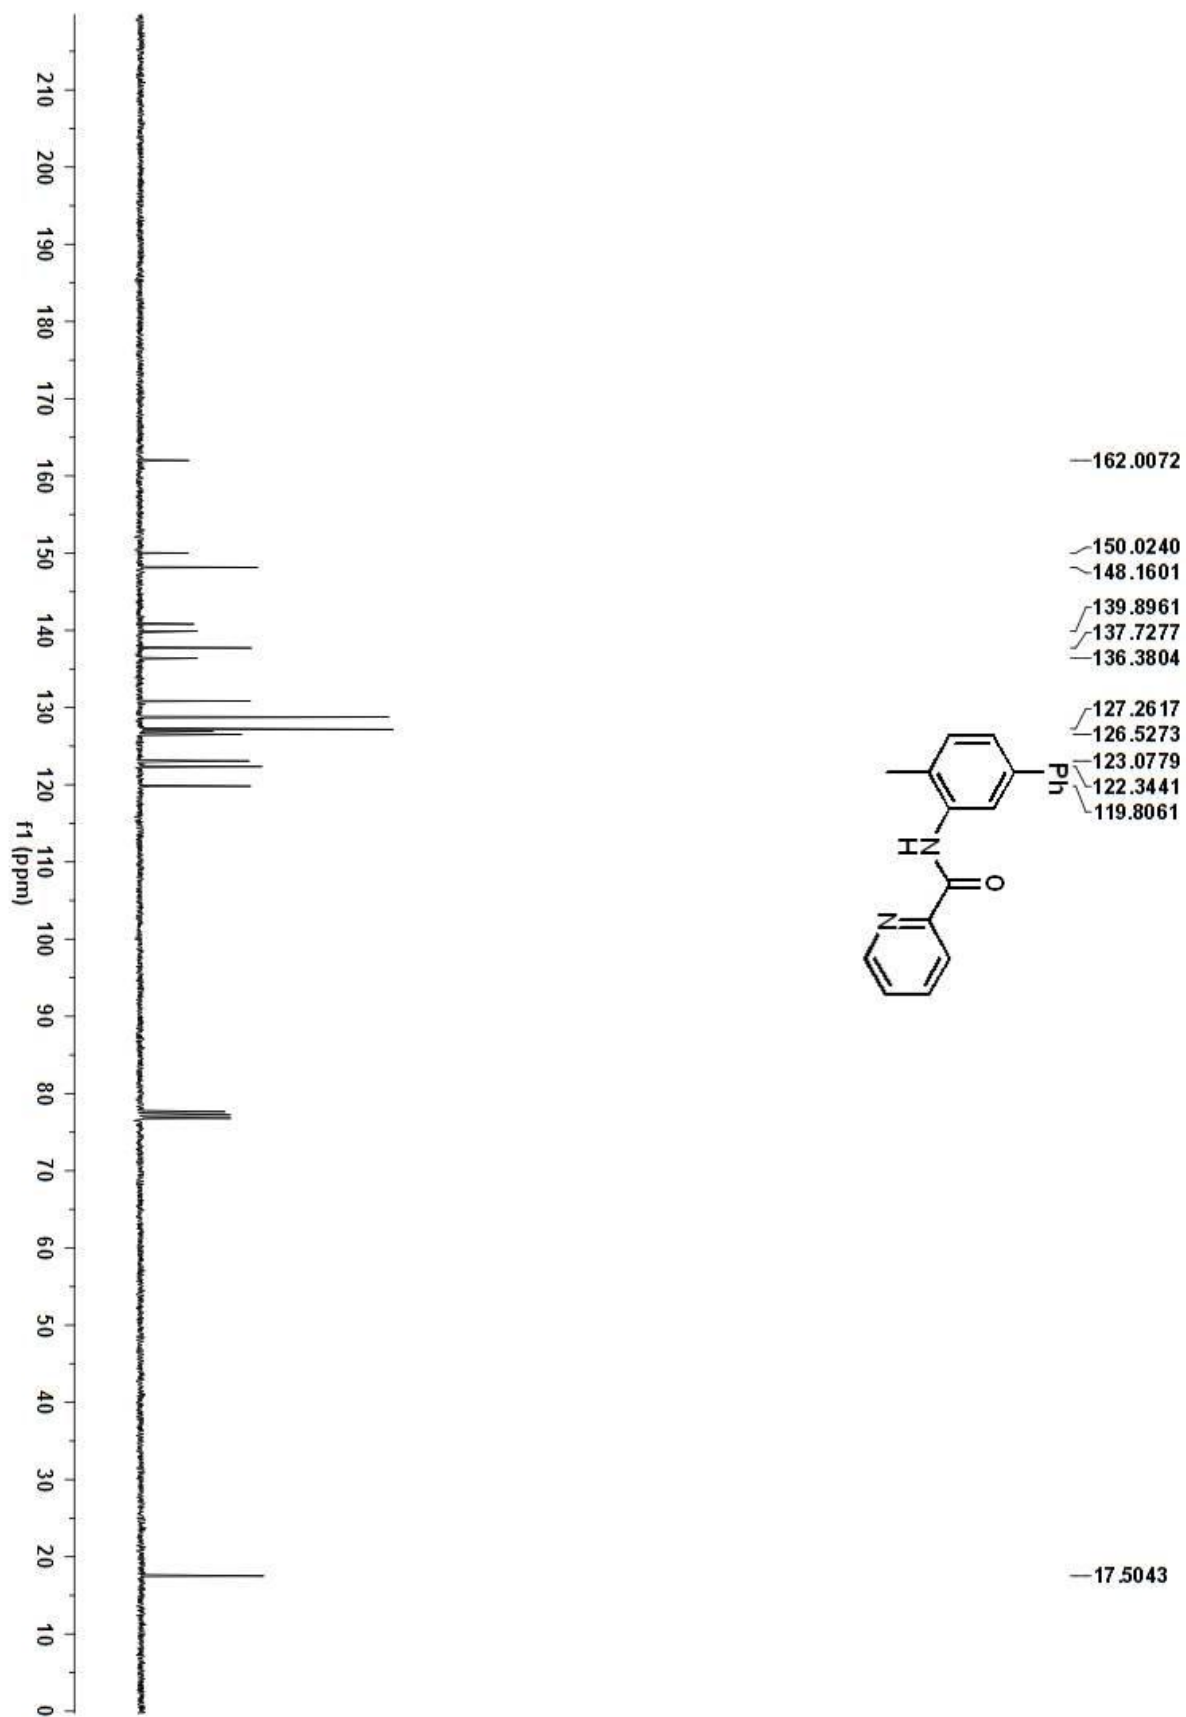

Compound 1e (300 MHz, CDCl<sub>3</sub>)

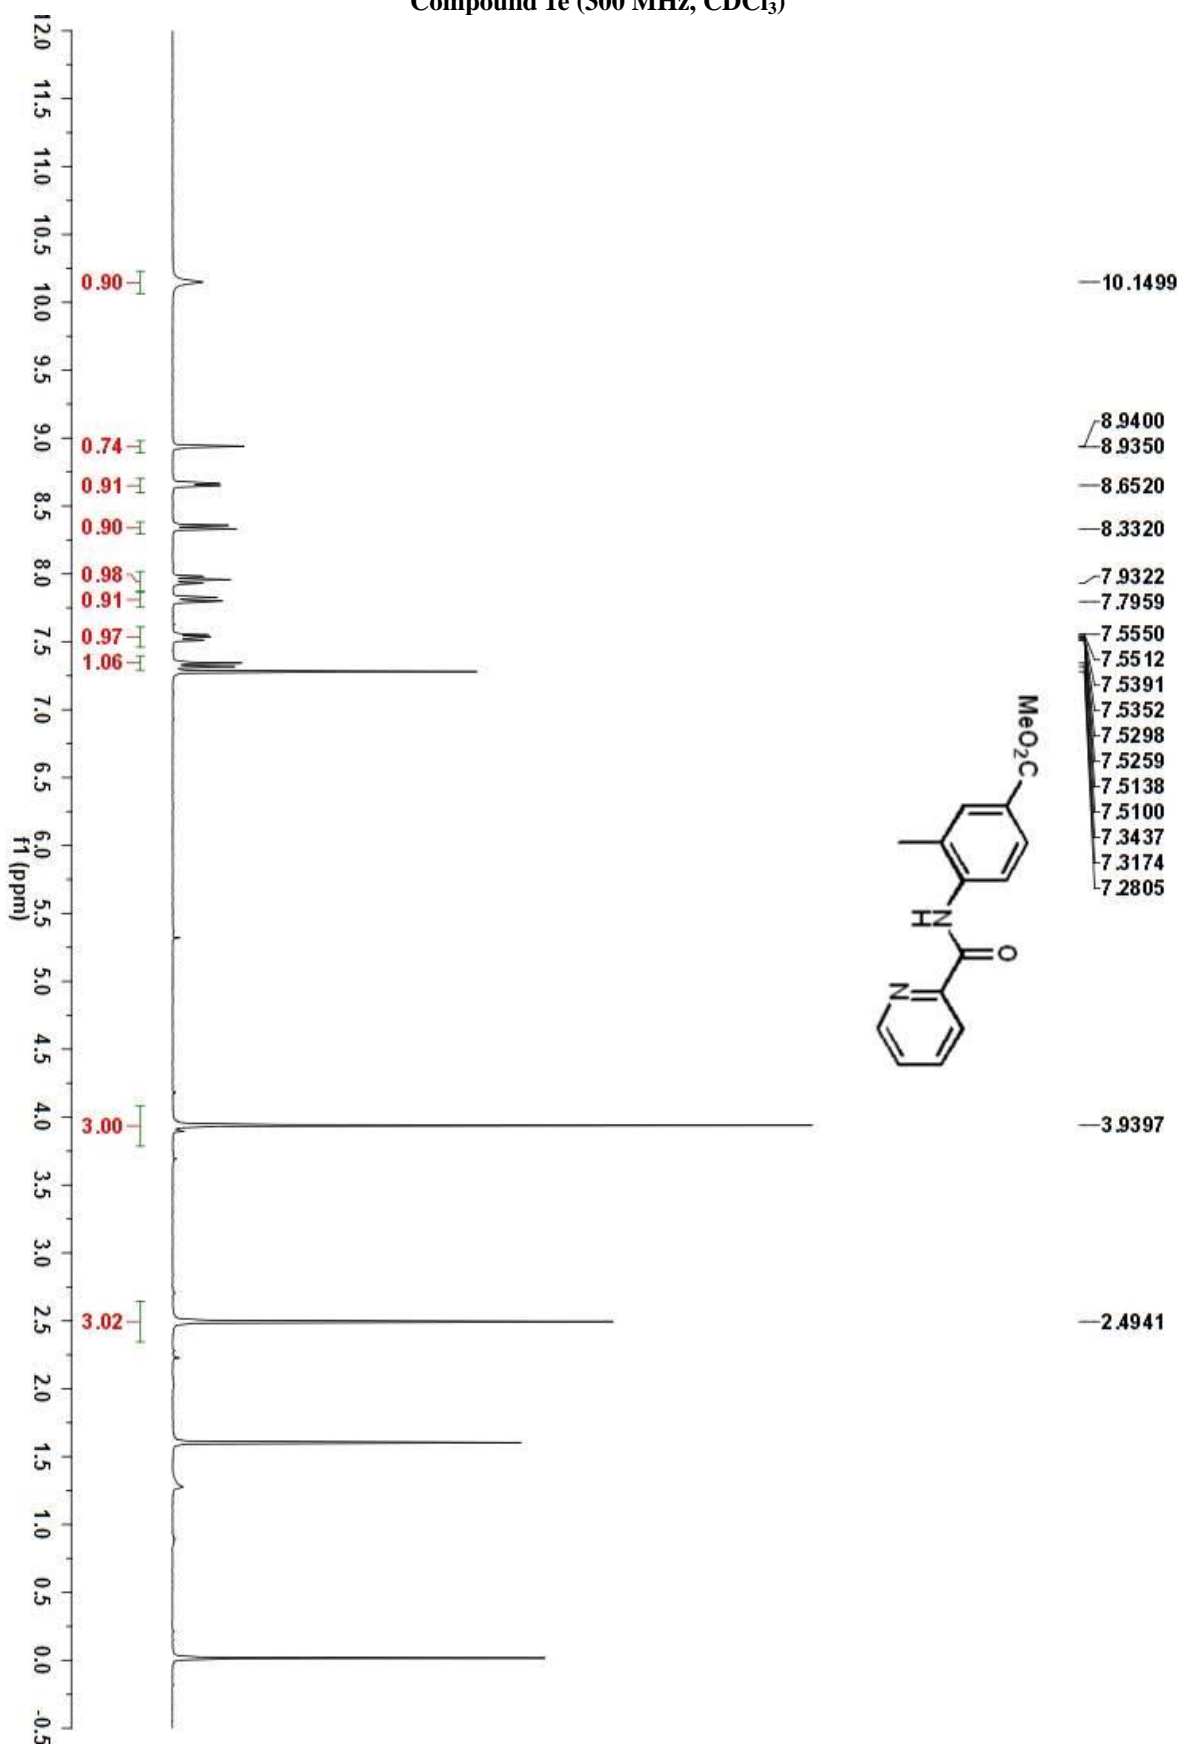

Compound 1e (75 MHz, CDCl<sub>3</sub>)

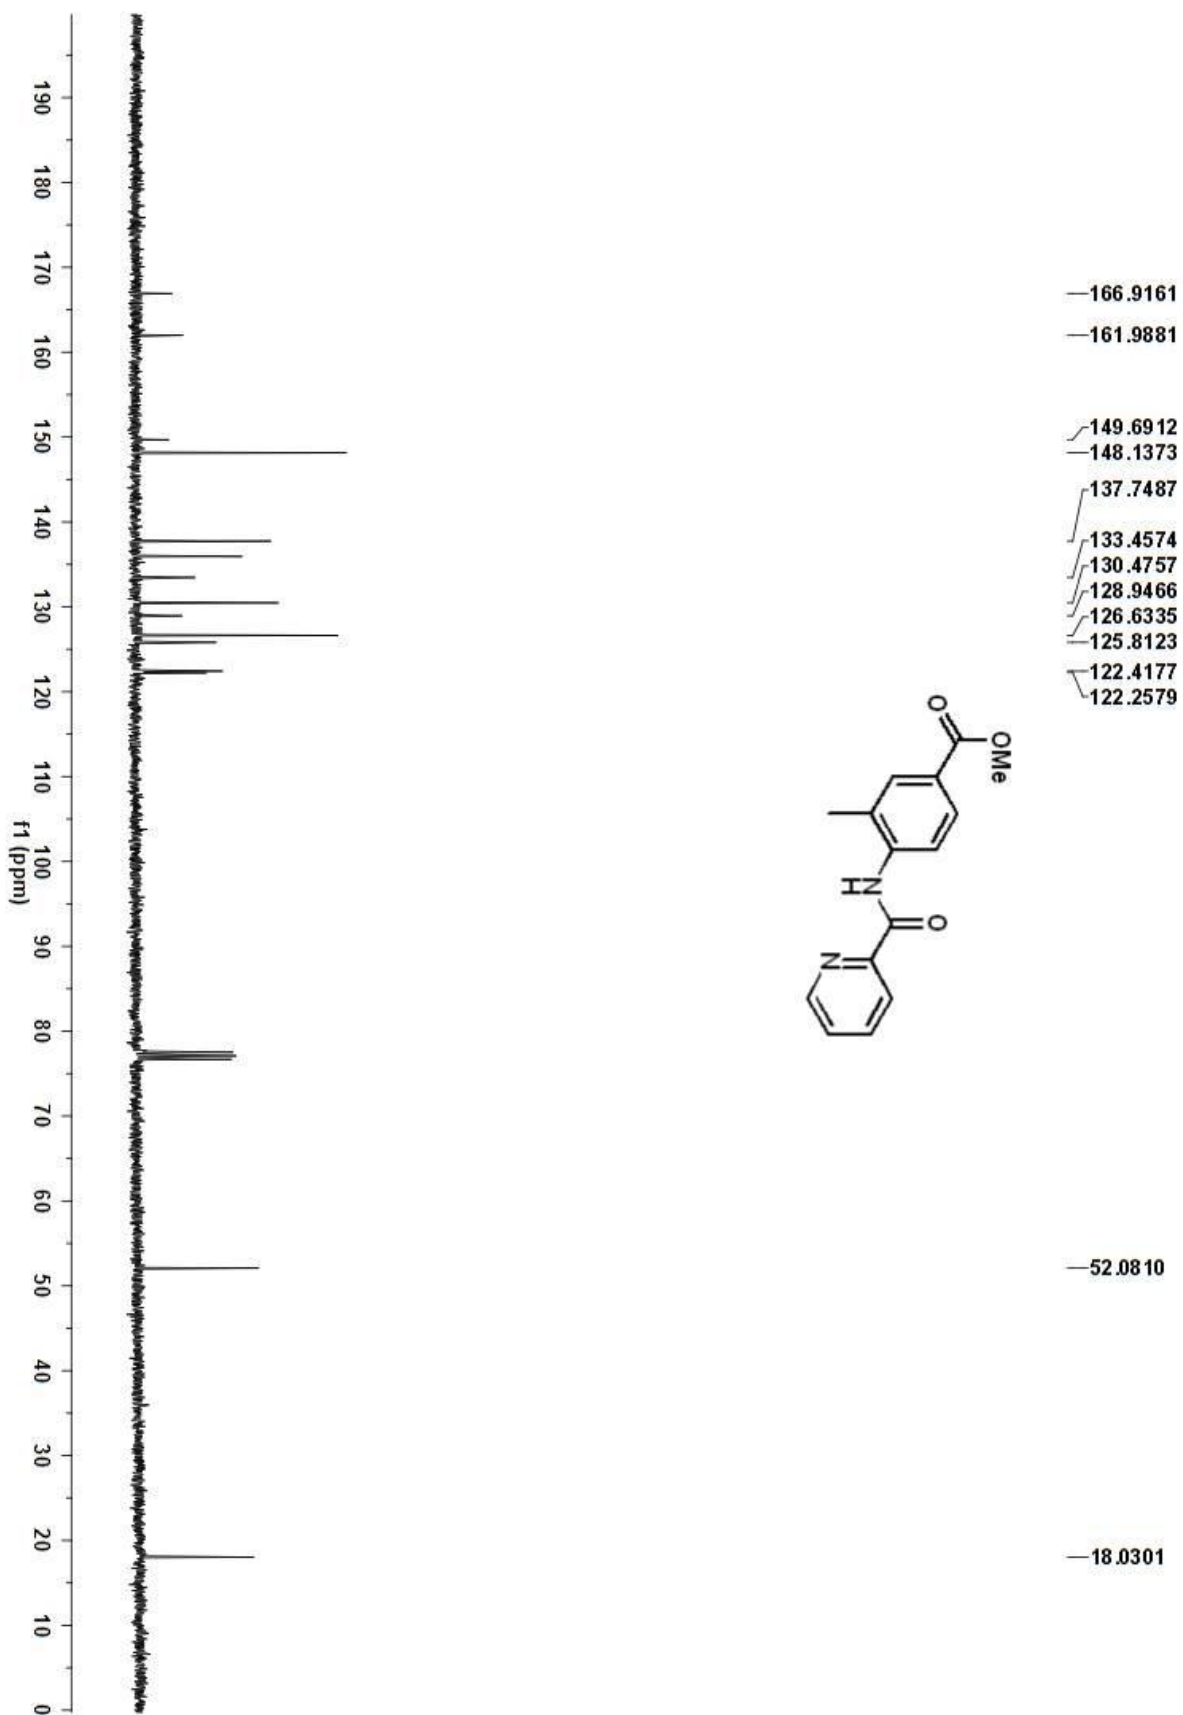



Compound 1f (300 MHz, CDCl<sub>3</sub>)

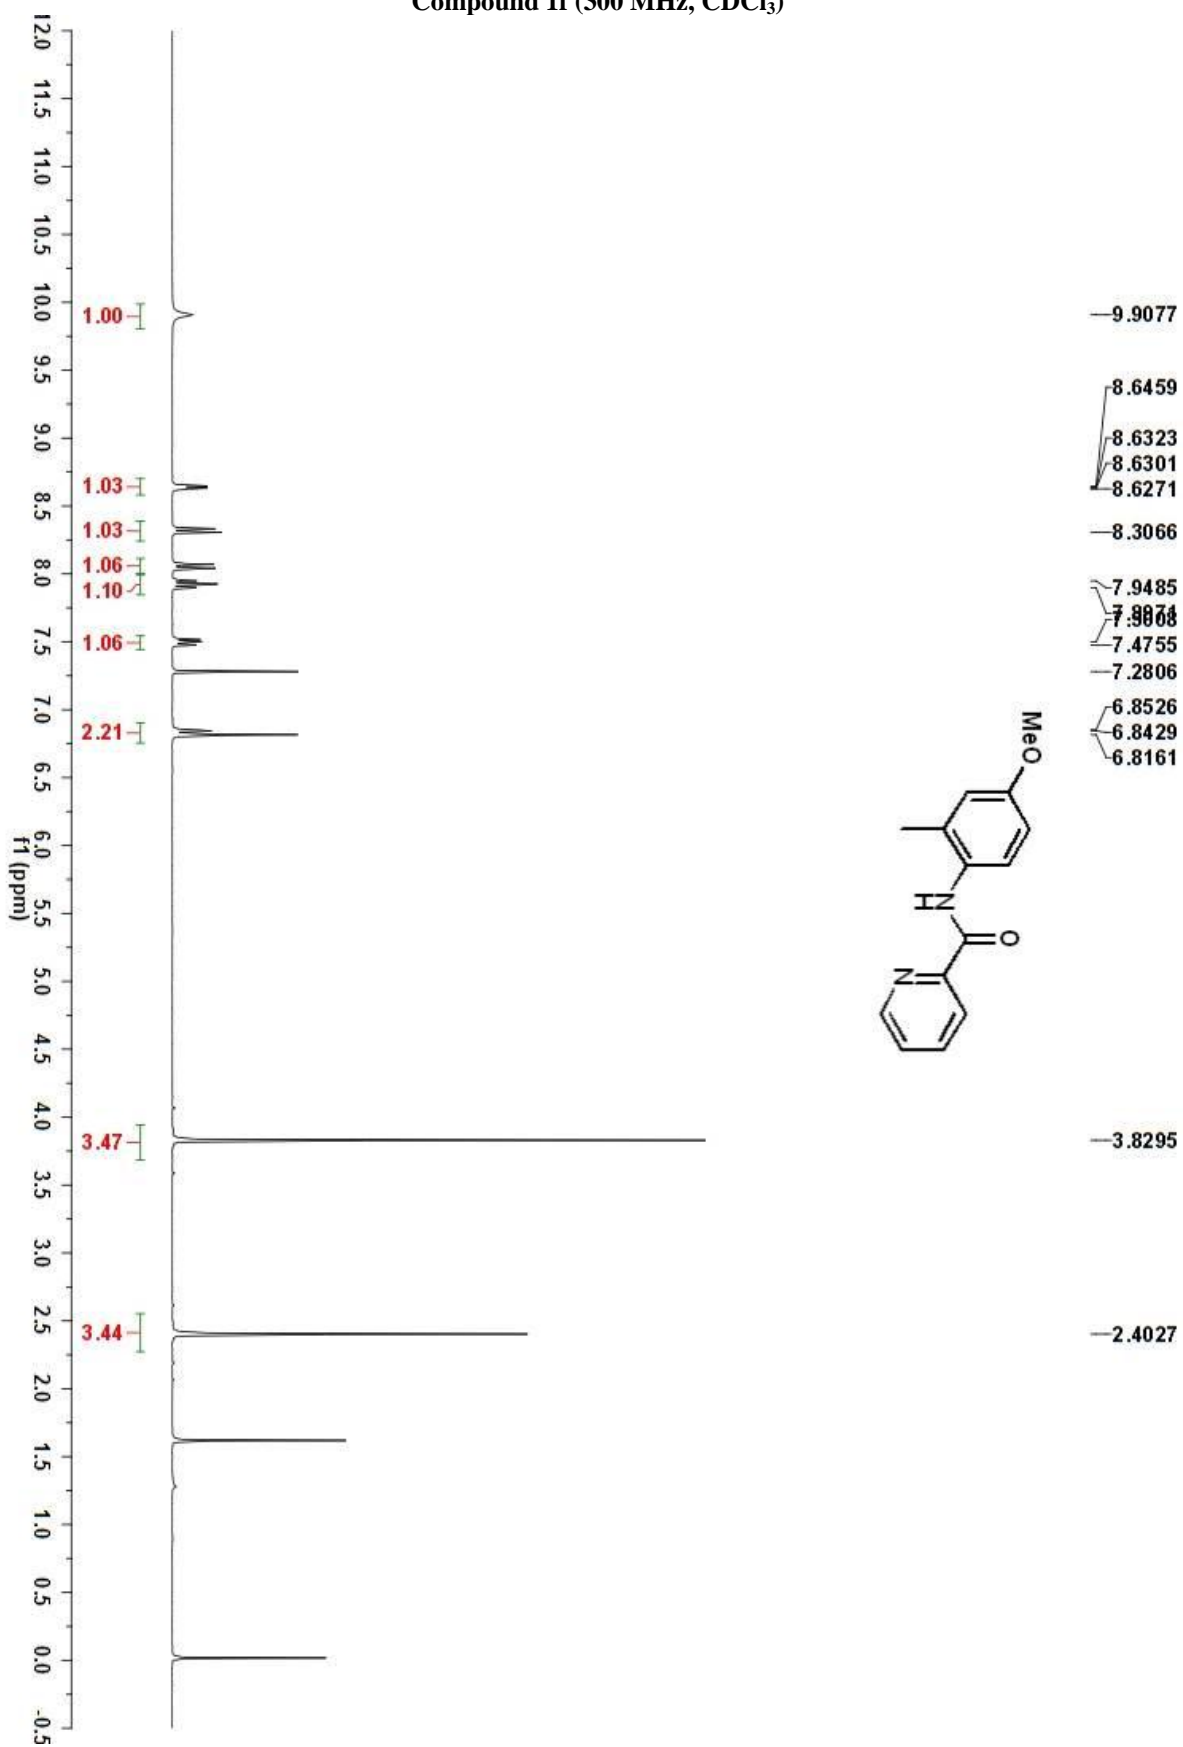

Compound 1f (75 MHz, CDCl<sub>3</sub>)

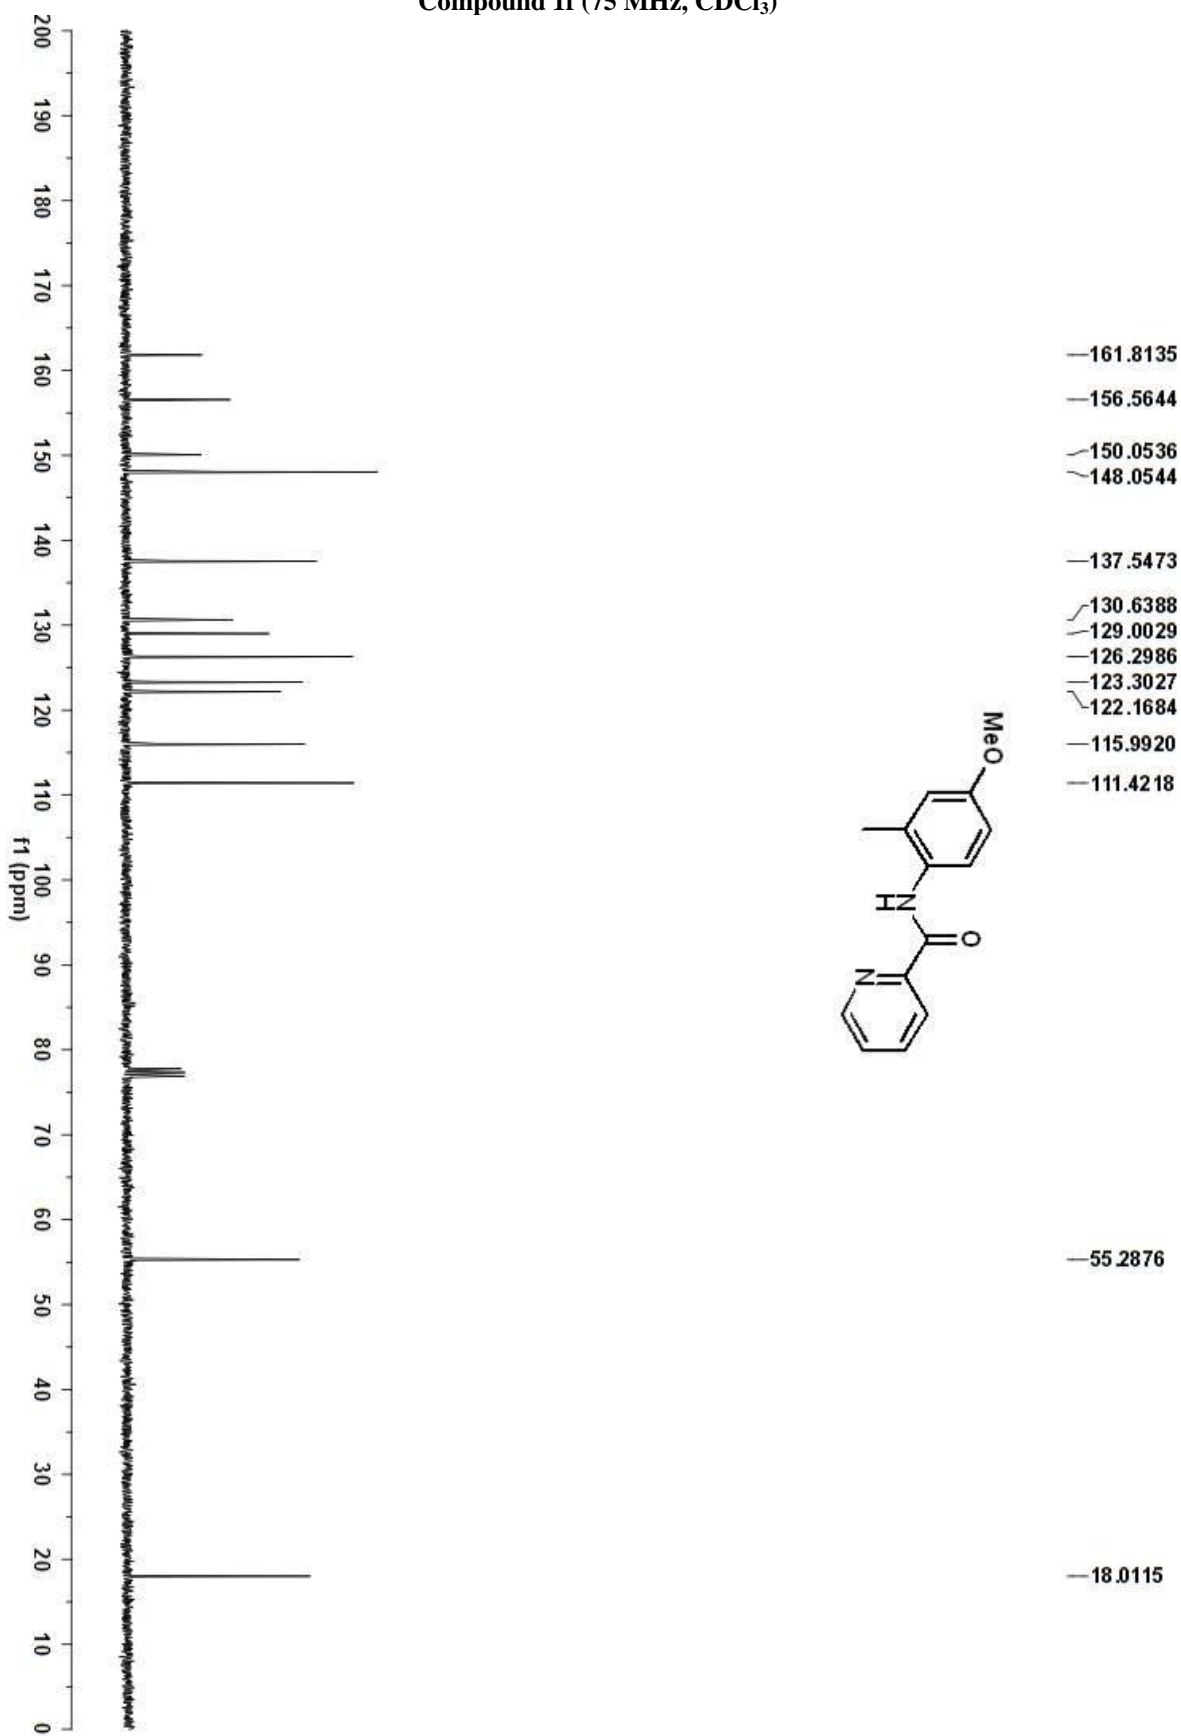

Compound 1g (300 MHz, CDCl<sub>3</sub>)

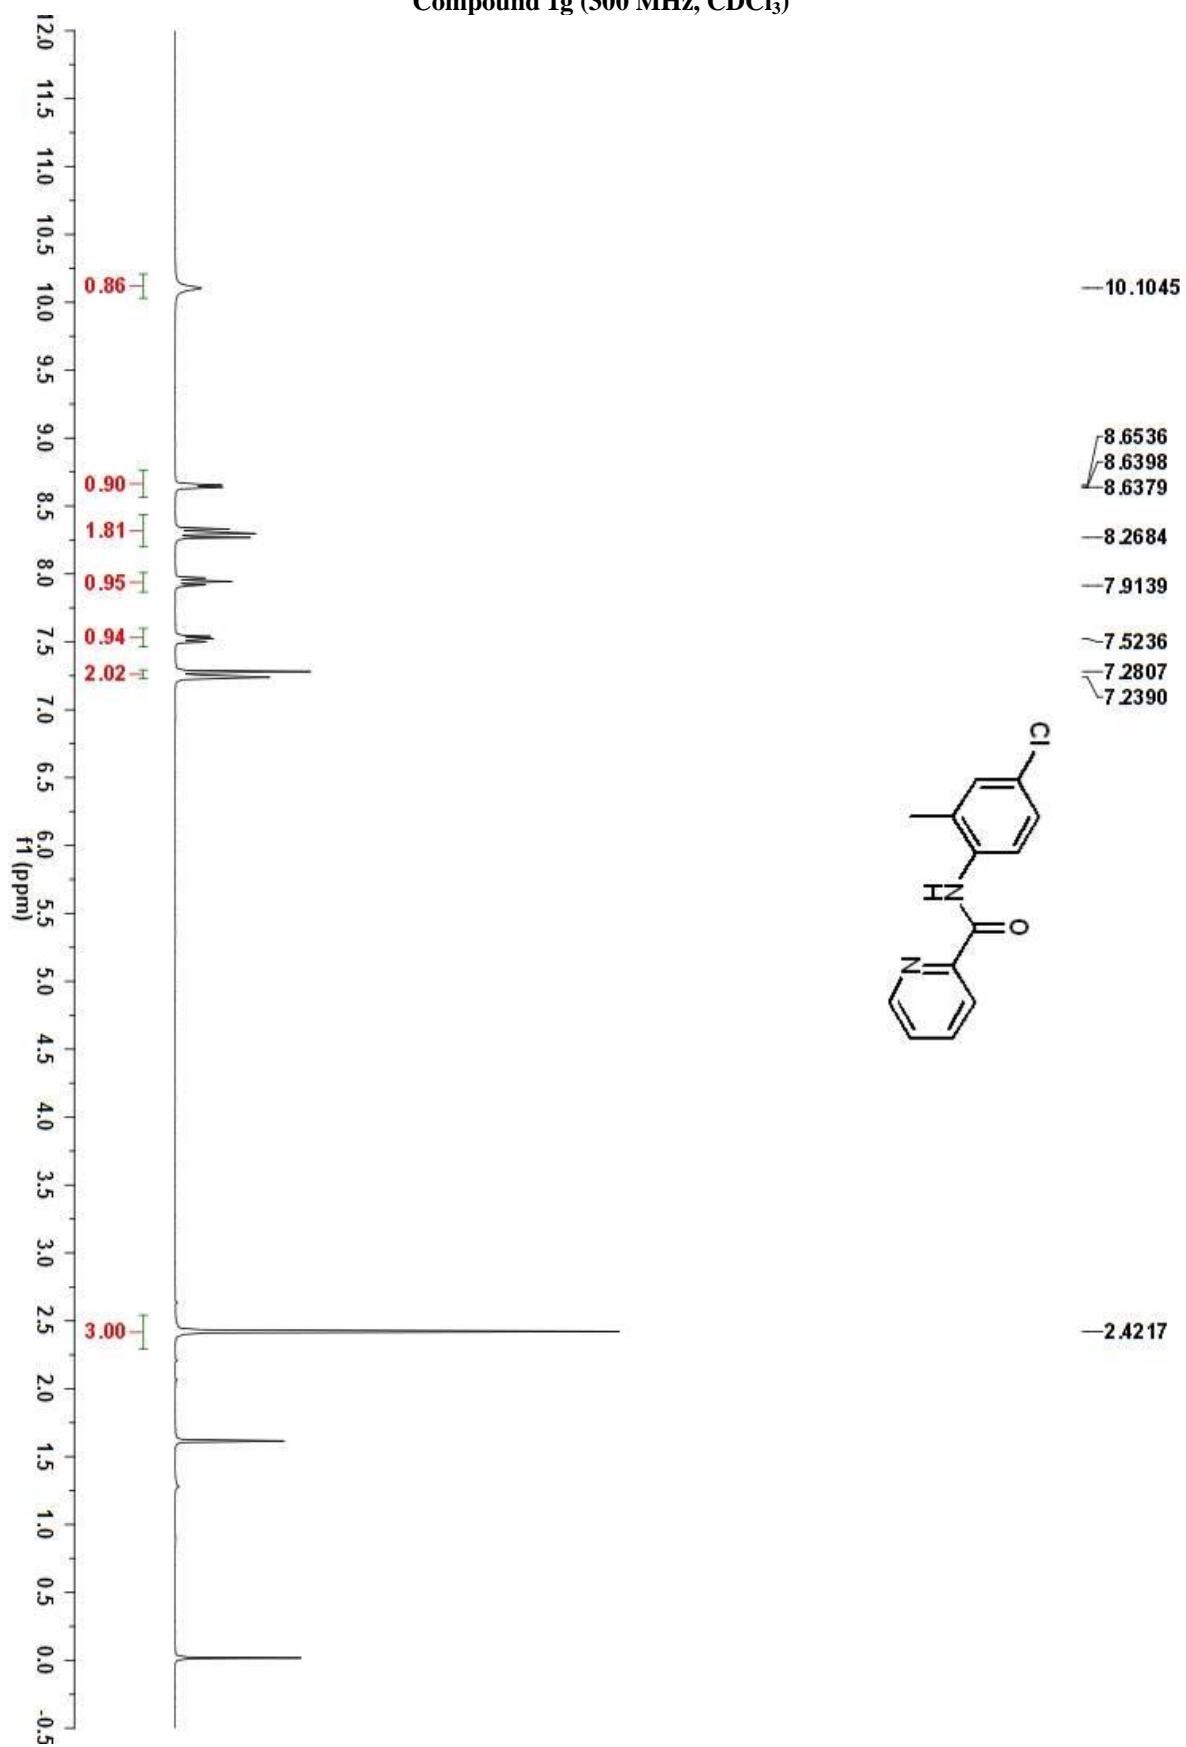

Compound 1g (75 MHz, CDCl<sub>3</sub>)

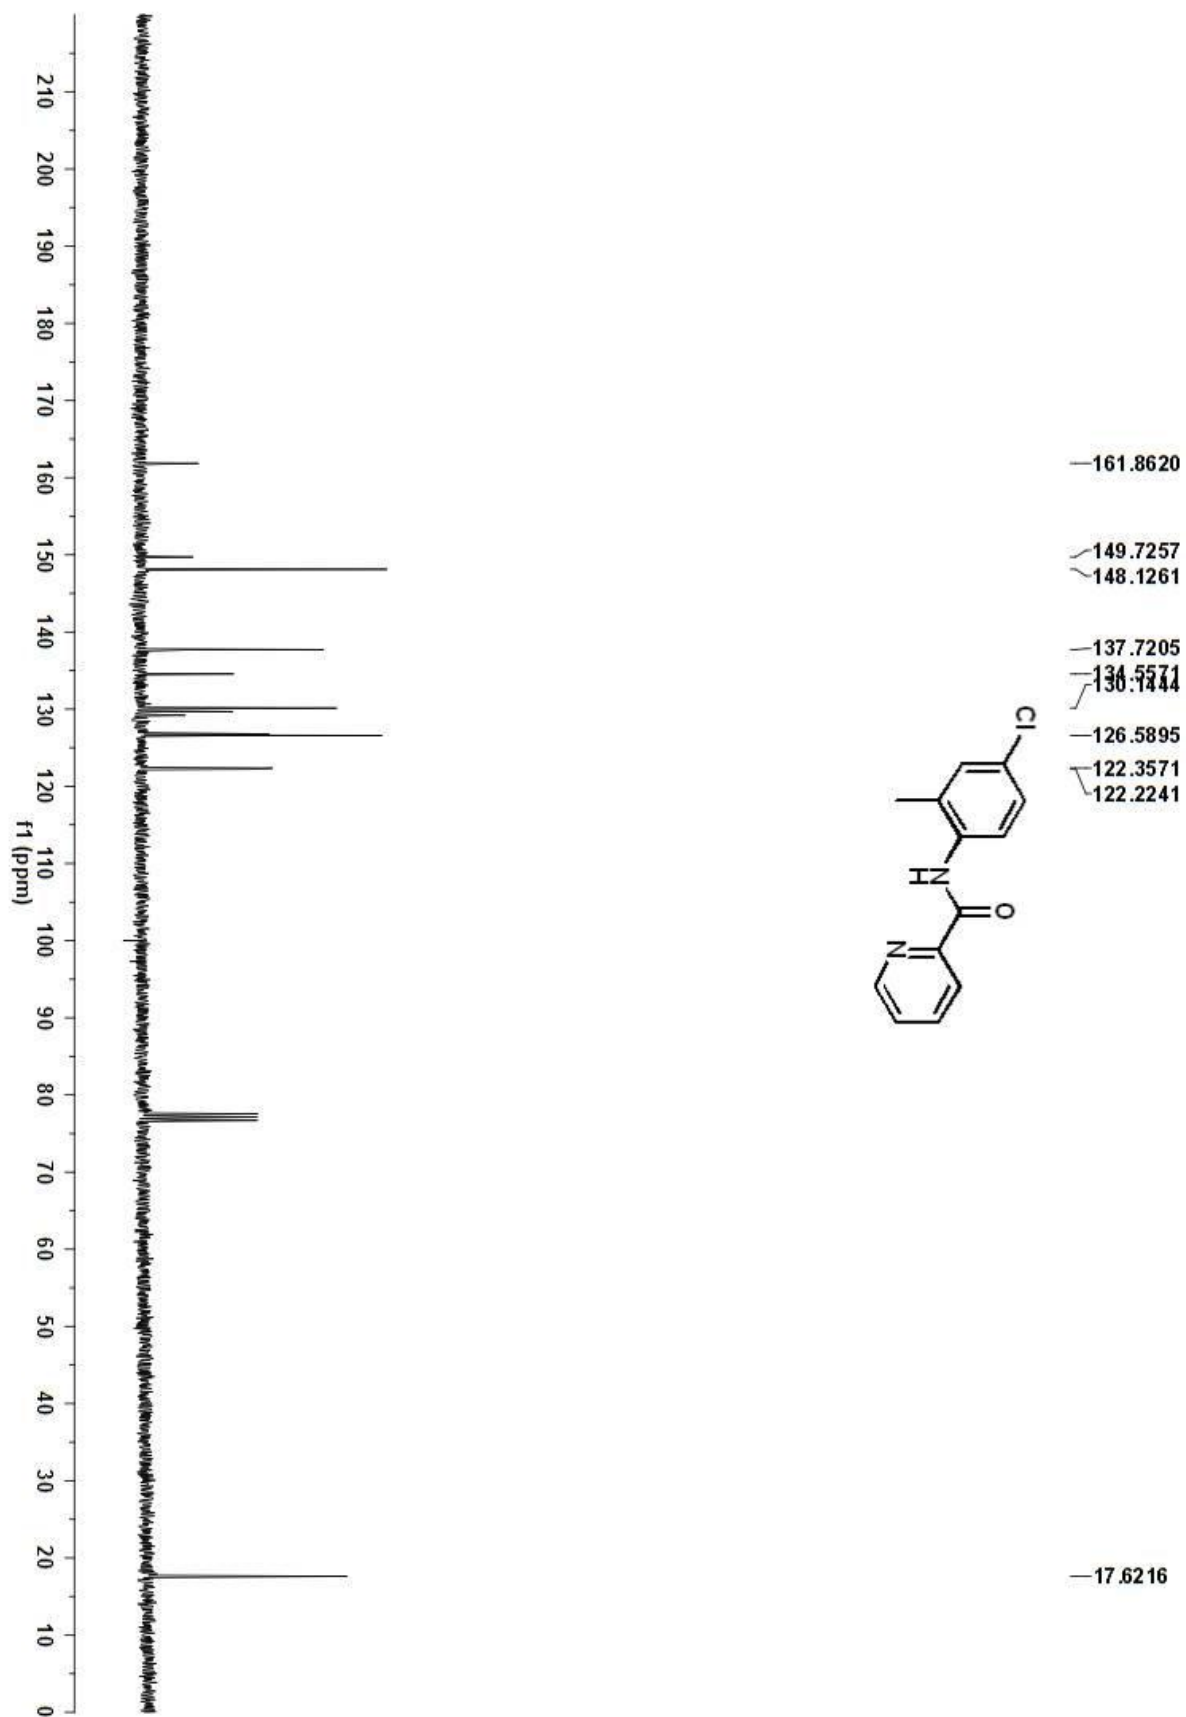

Compound 1h (300 MHz, CDCl<sub>3</sub>)

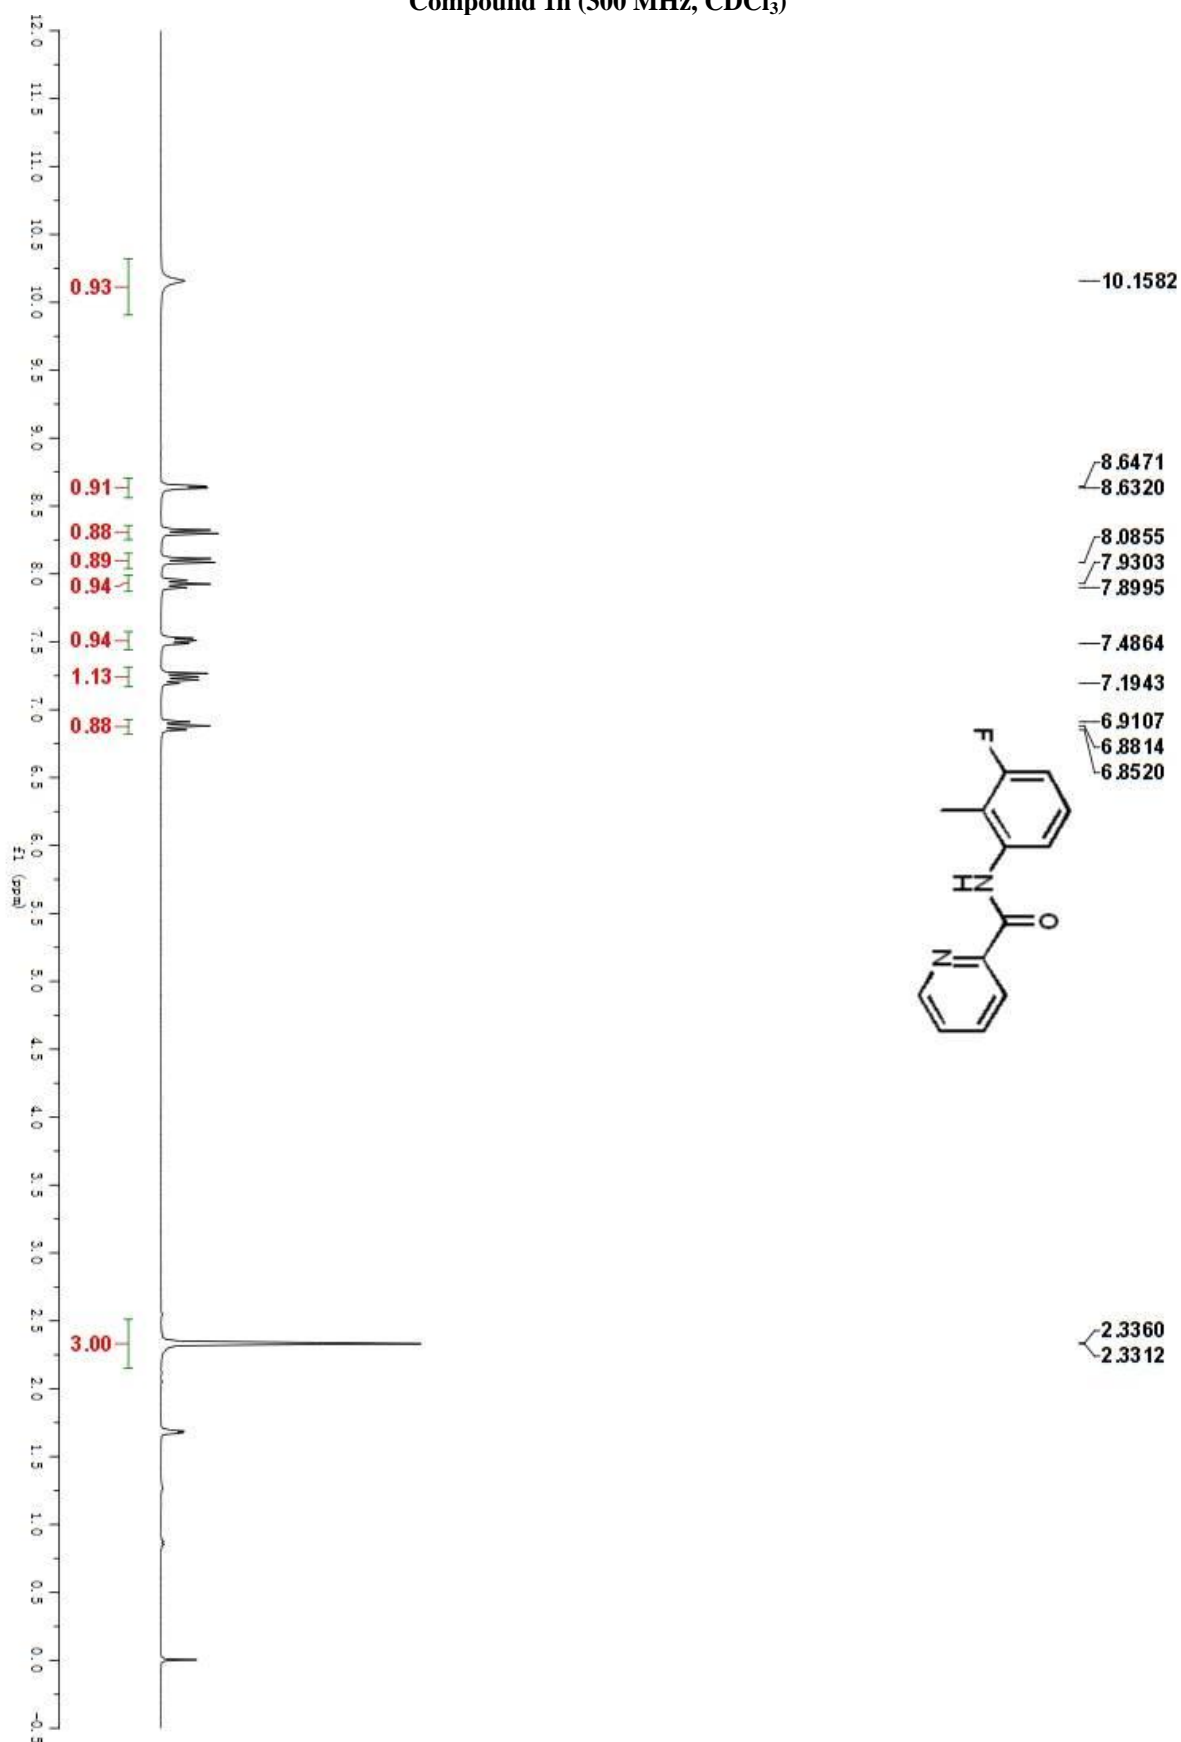

Compound 1h (75 MHz, CDCl<sub>3</sub>)

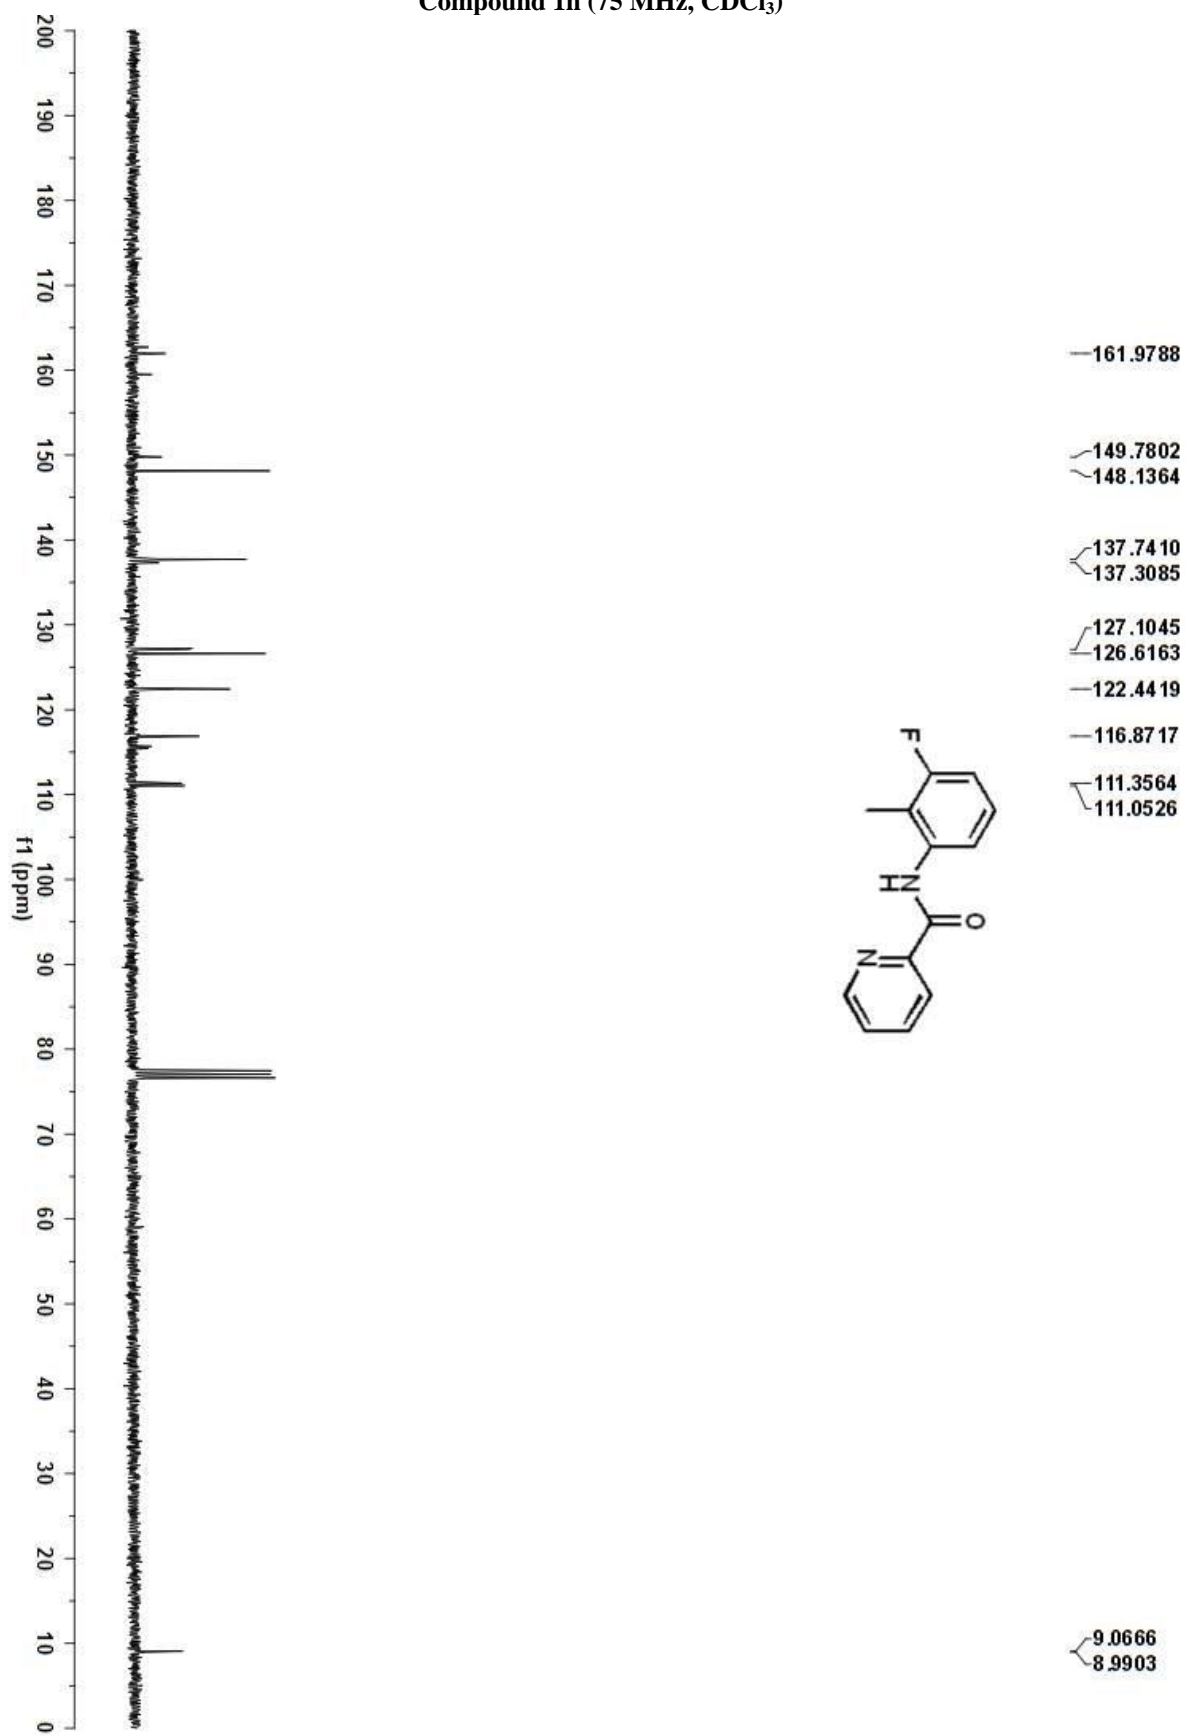

Compound 1i (300 MHz, CDCl<sub>3</sub>)

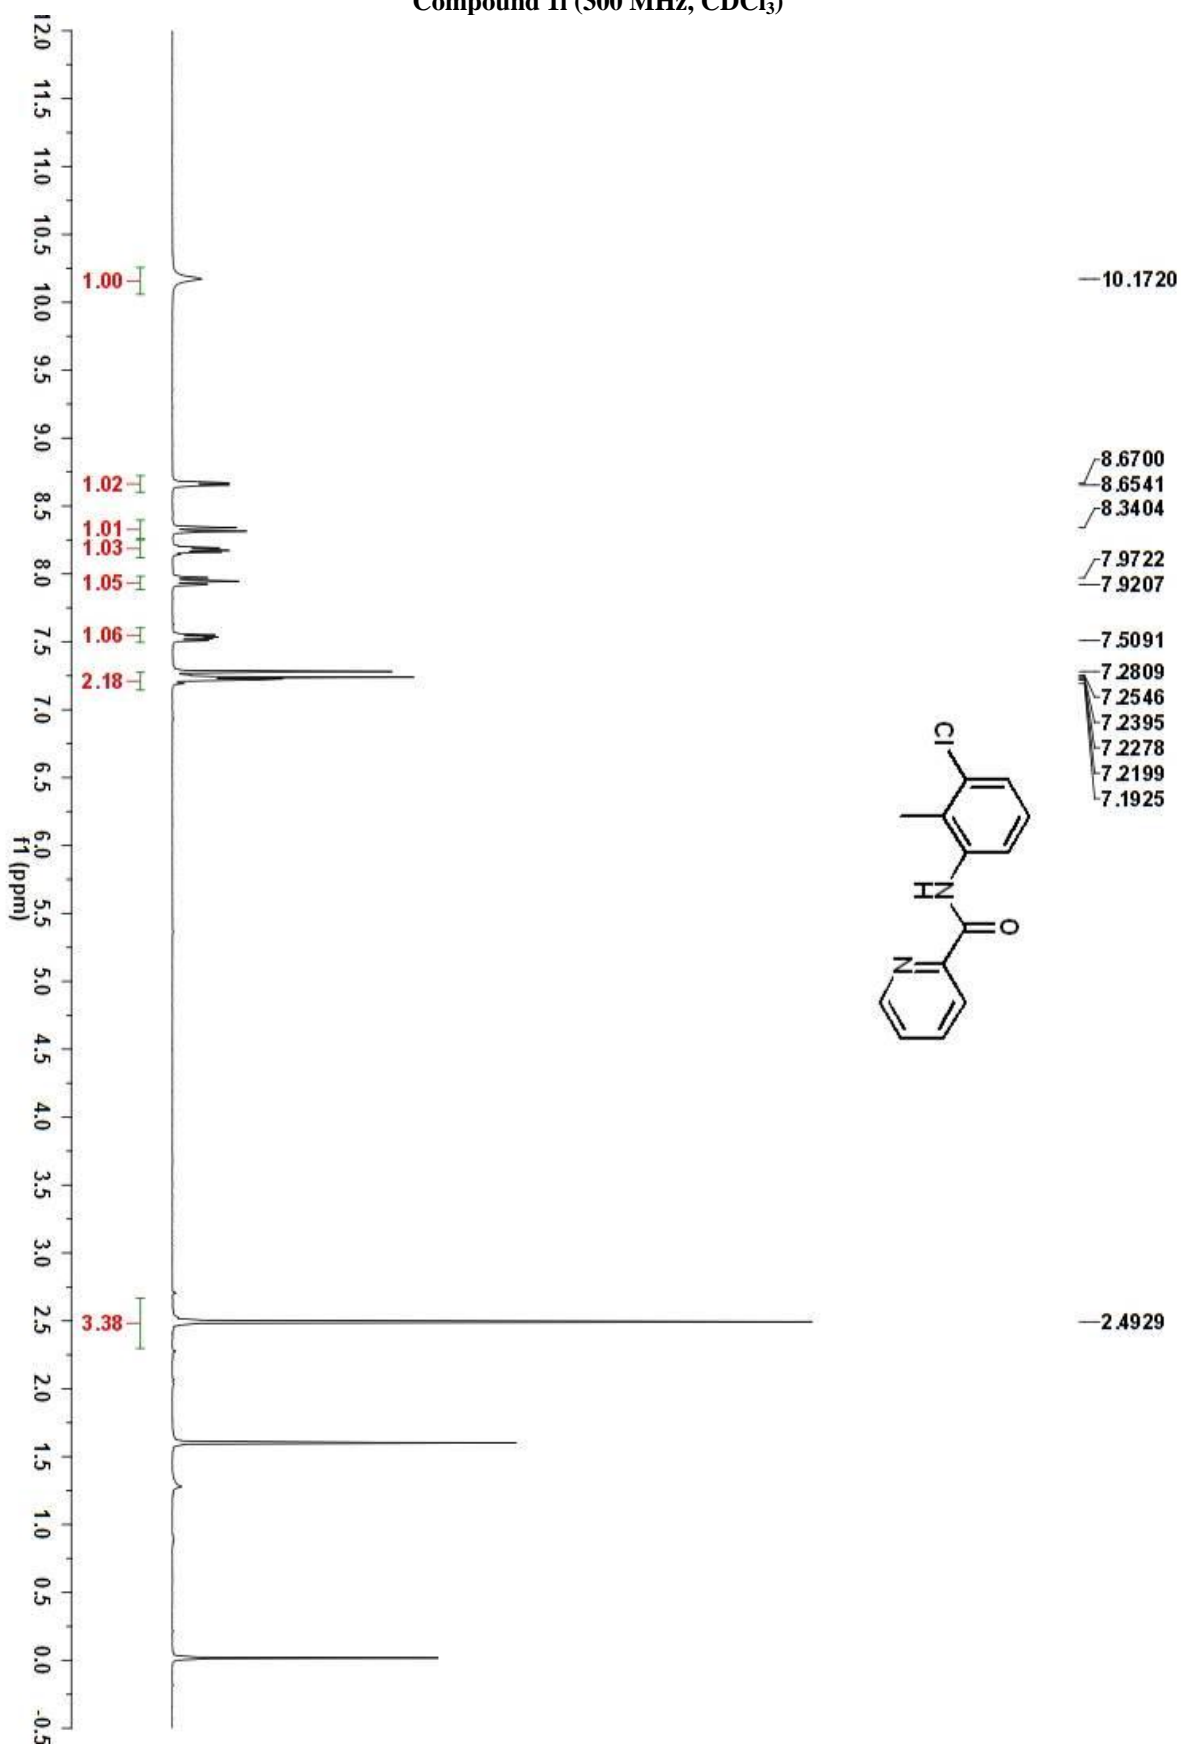

Compound 1i (75 MHz, CDCl<sub>3</sub>)

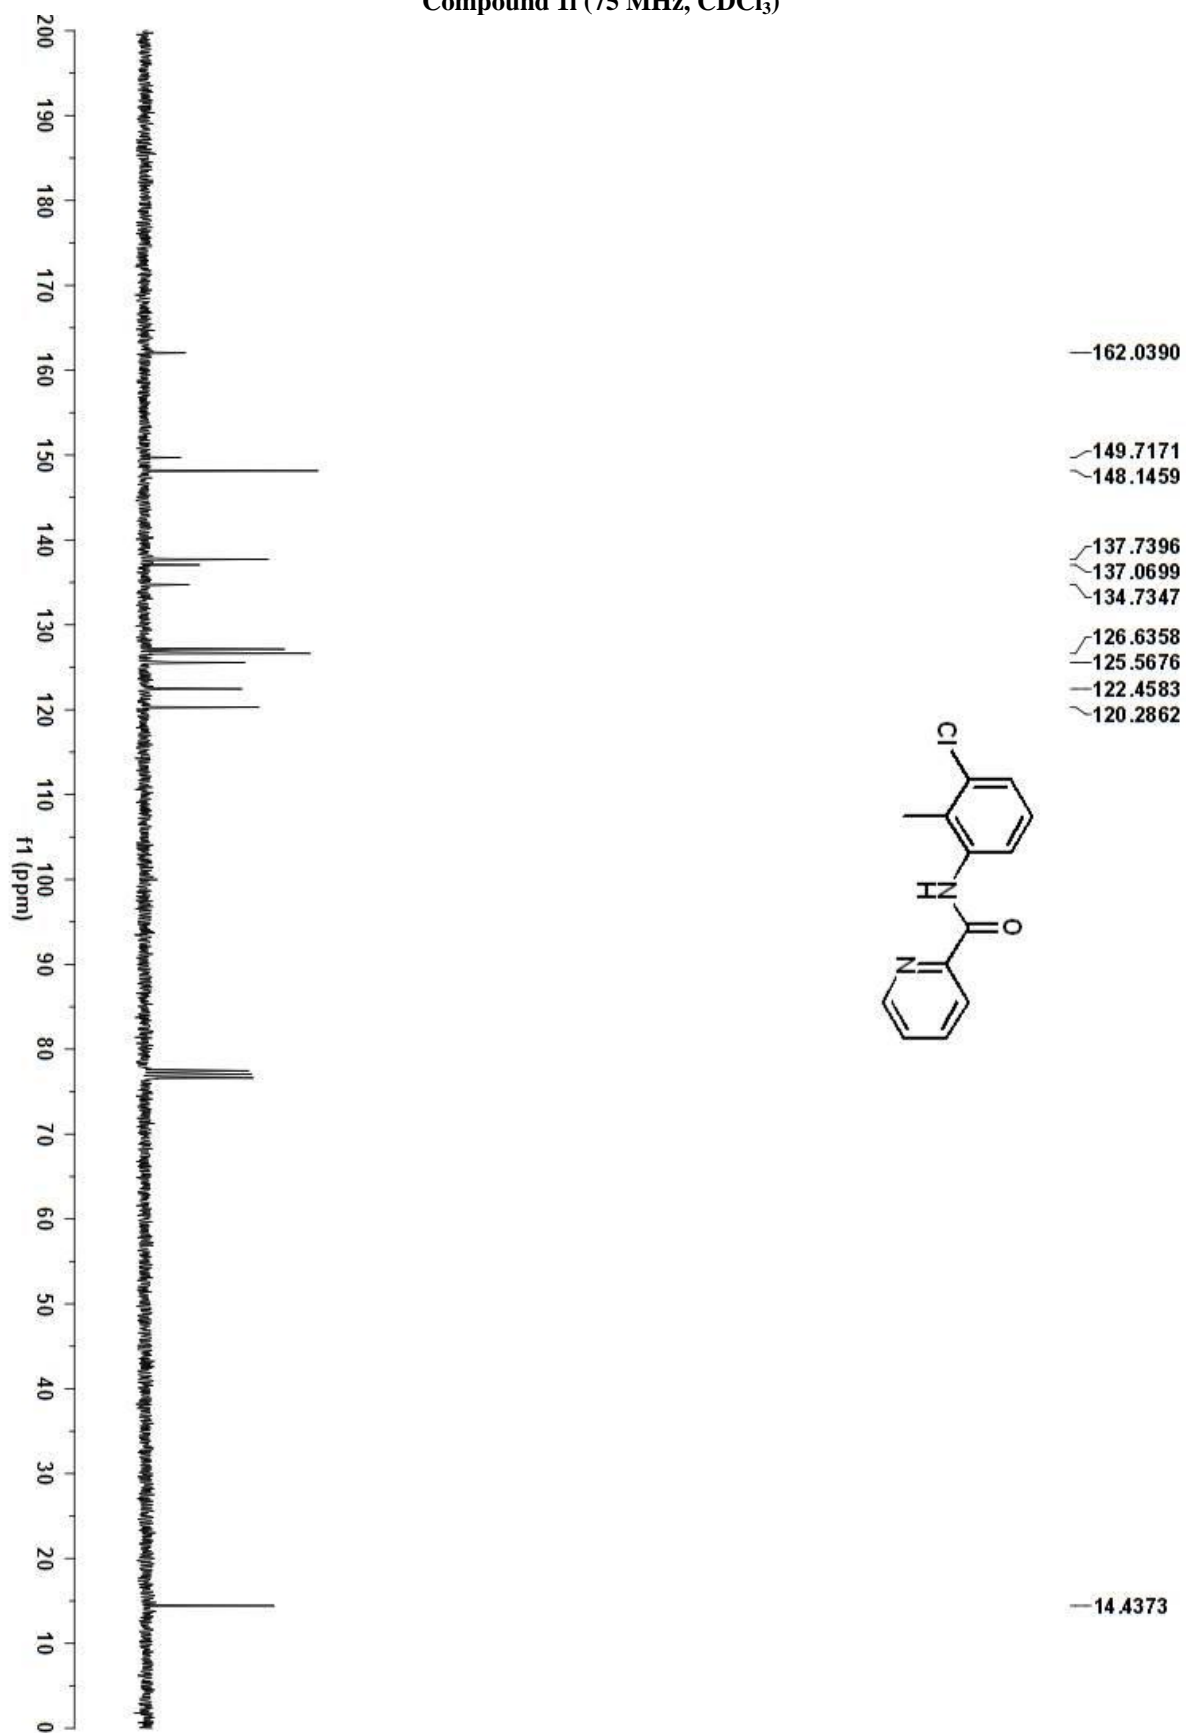



Compound 1j (300 MHz, CDCl<sub>3</sub>)

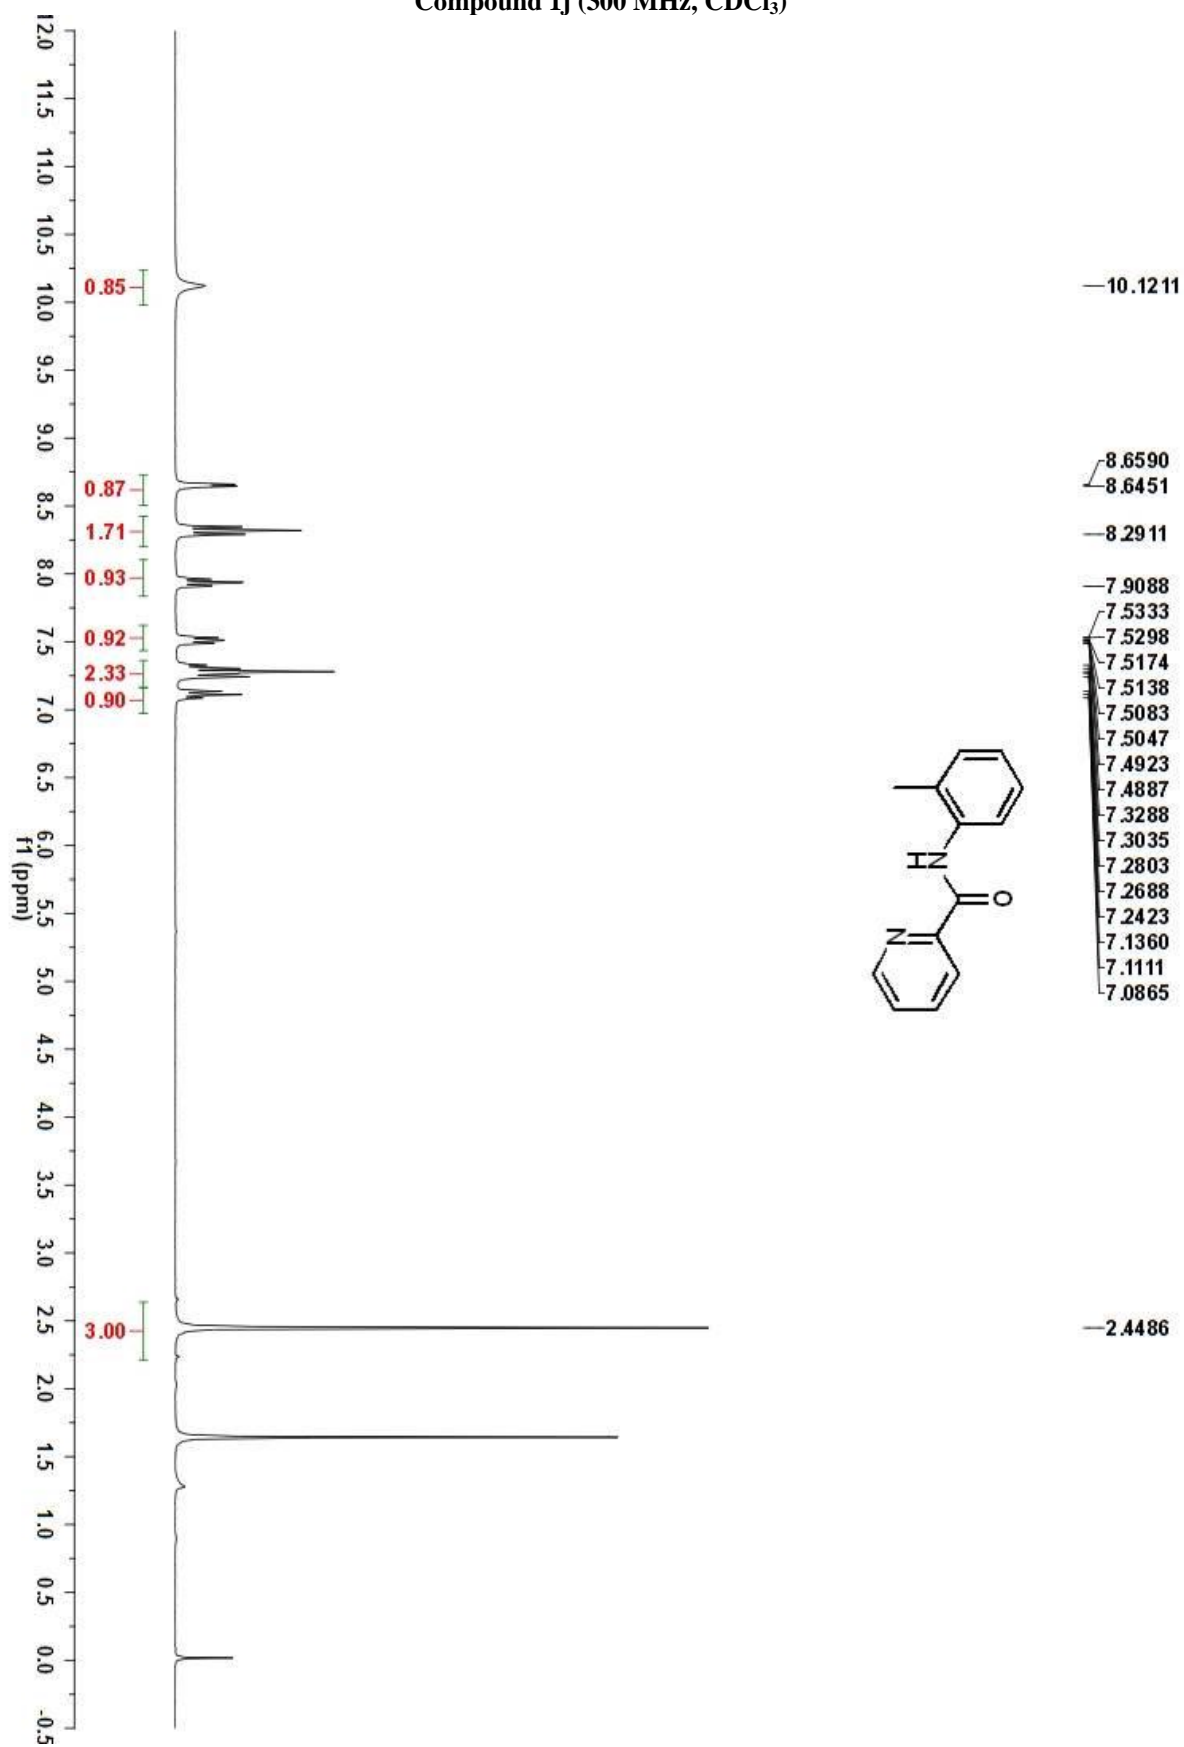

Compound 1j (75 MHz, CDCl<sub>3</sub>)

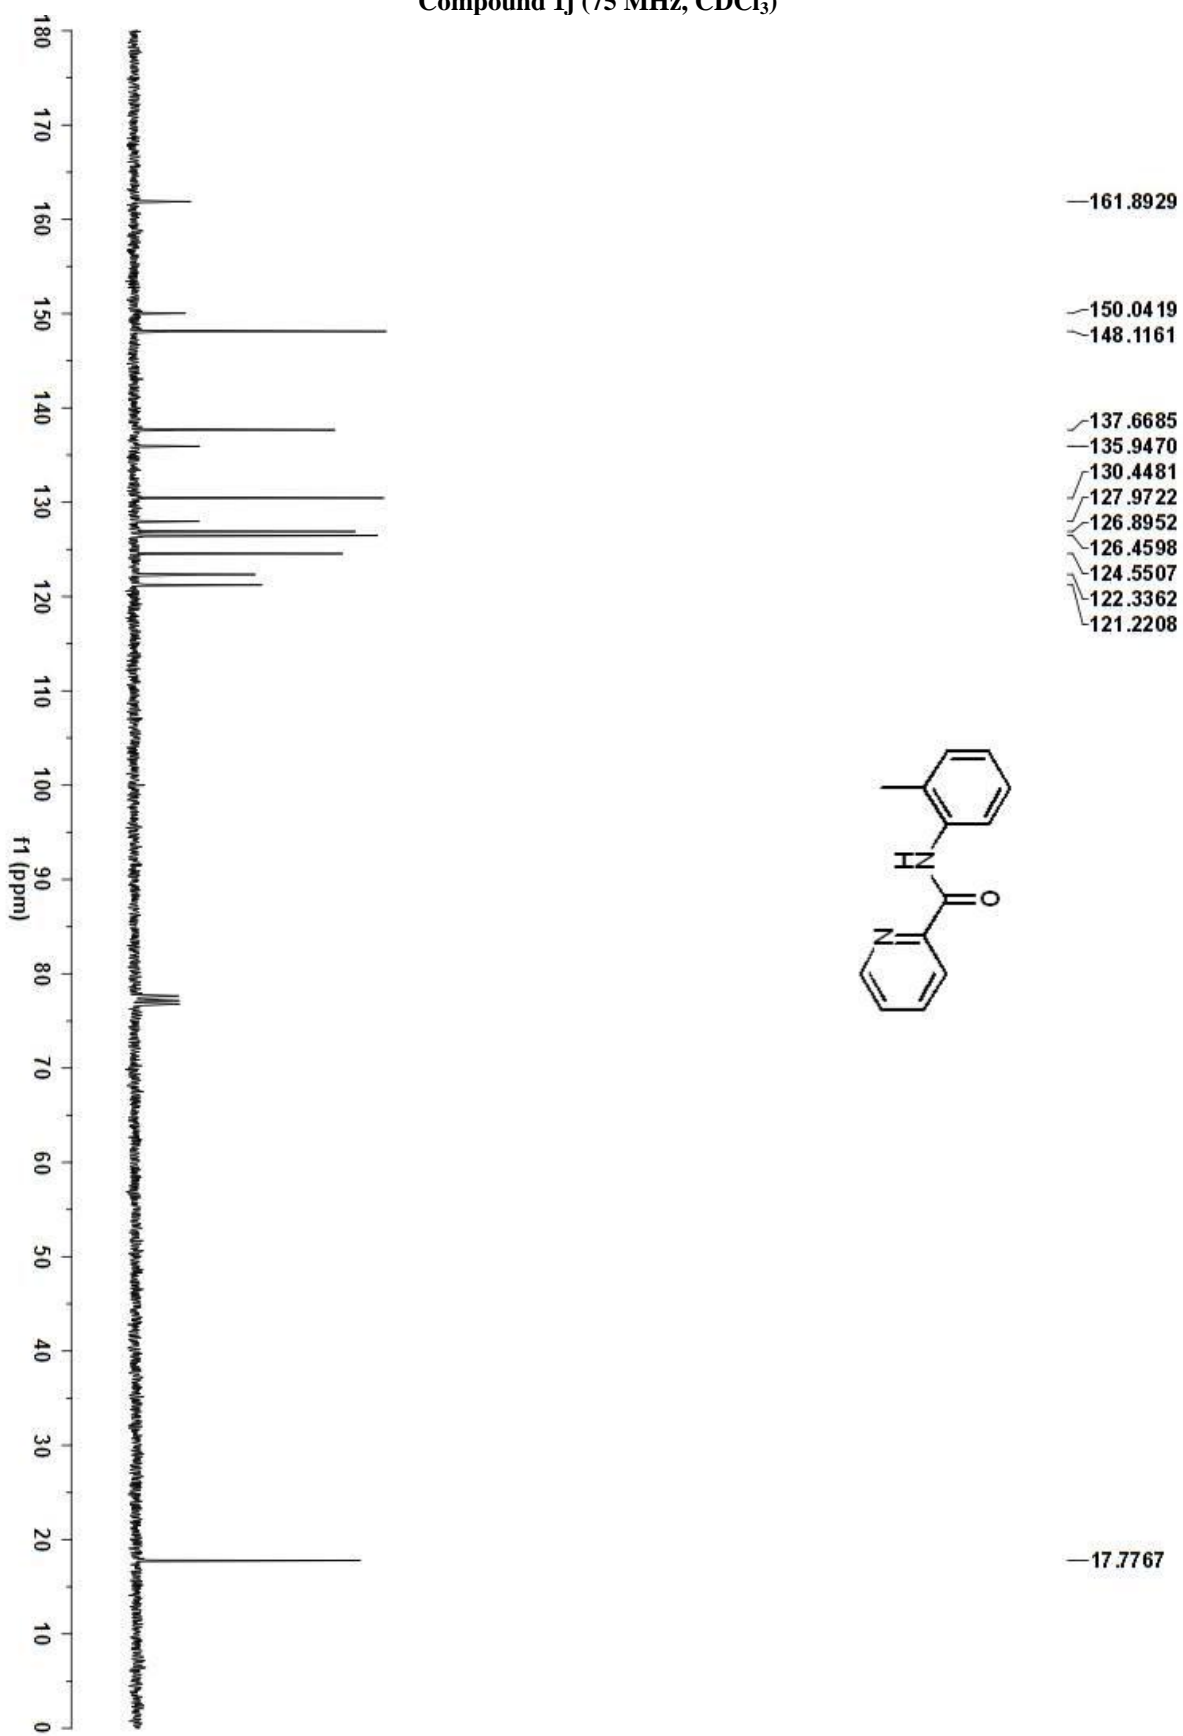

Compound 1k (300 MHz, CDCl<sub>3</sub>)

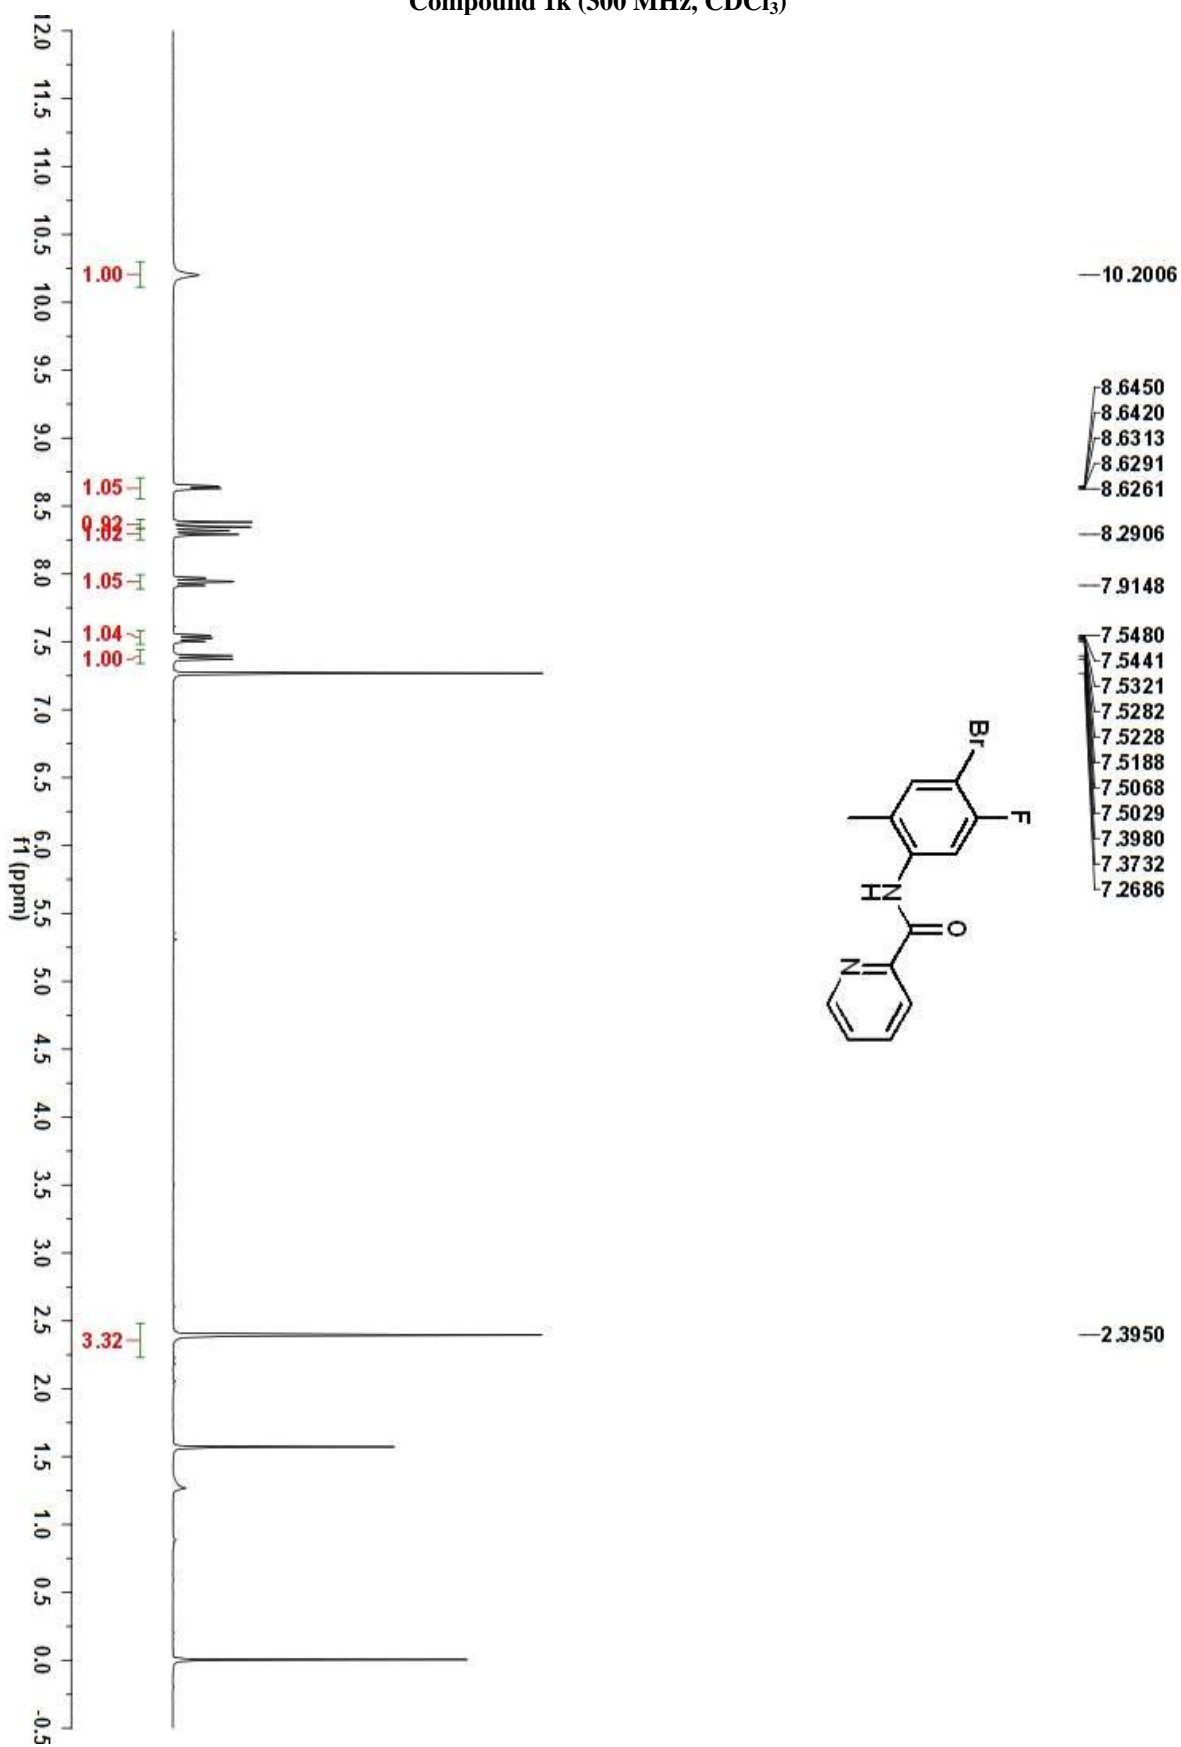

Compound 1k (75 MHz, CDCl<sub>3</sub>)

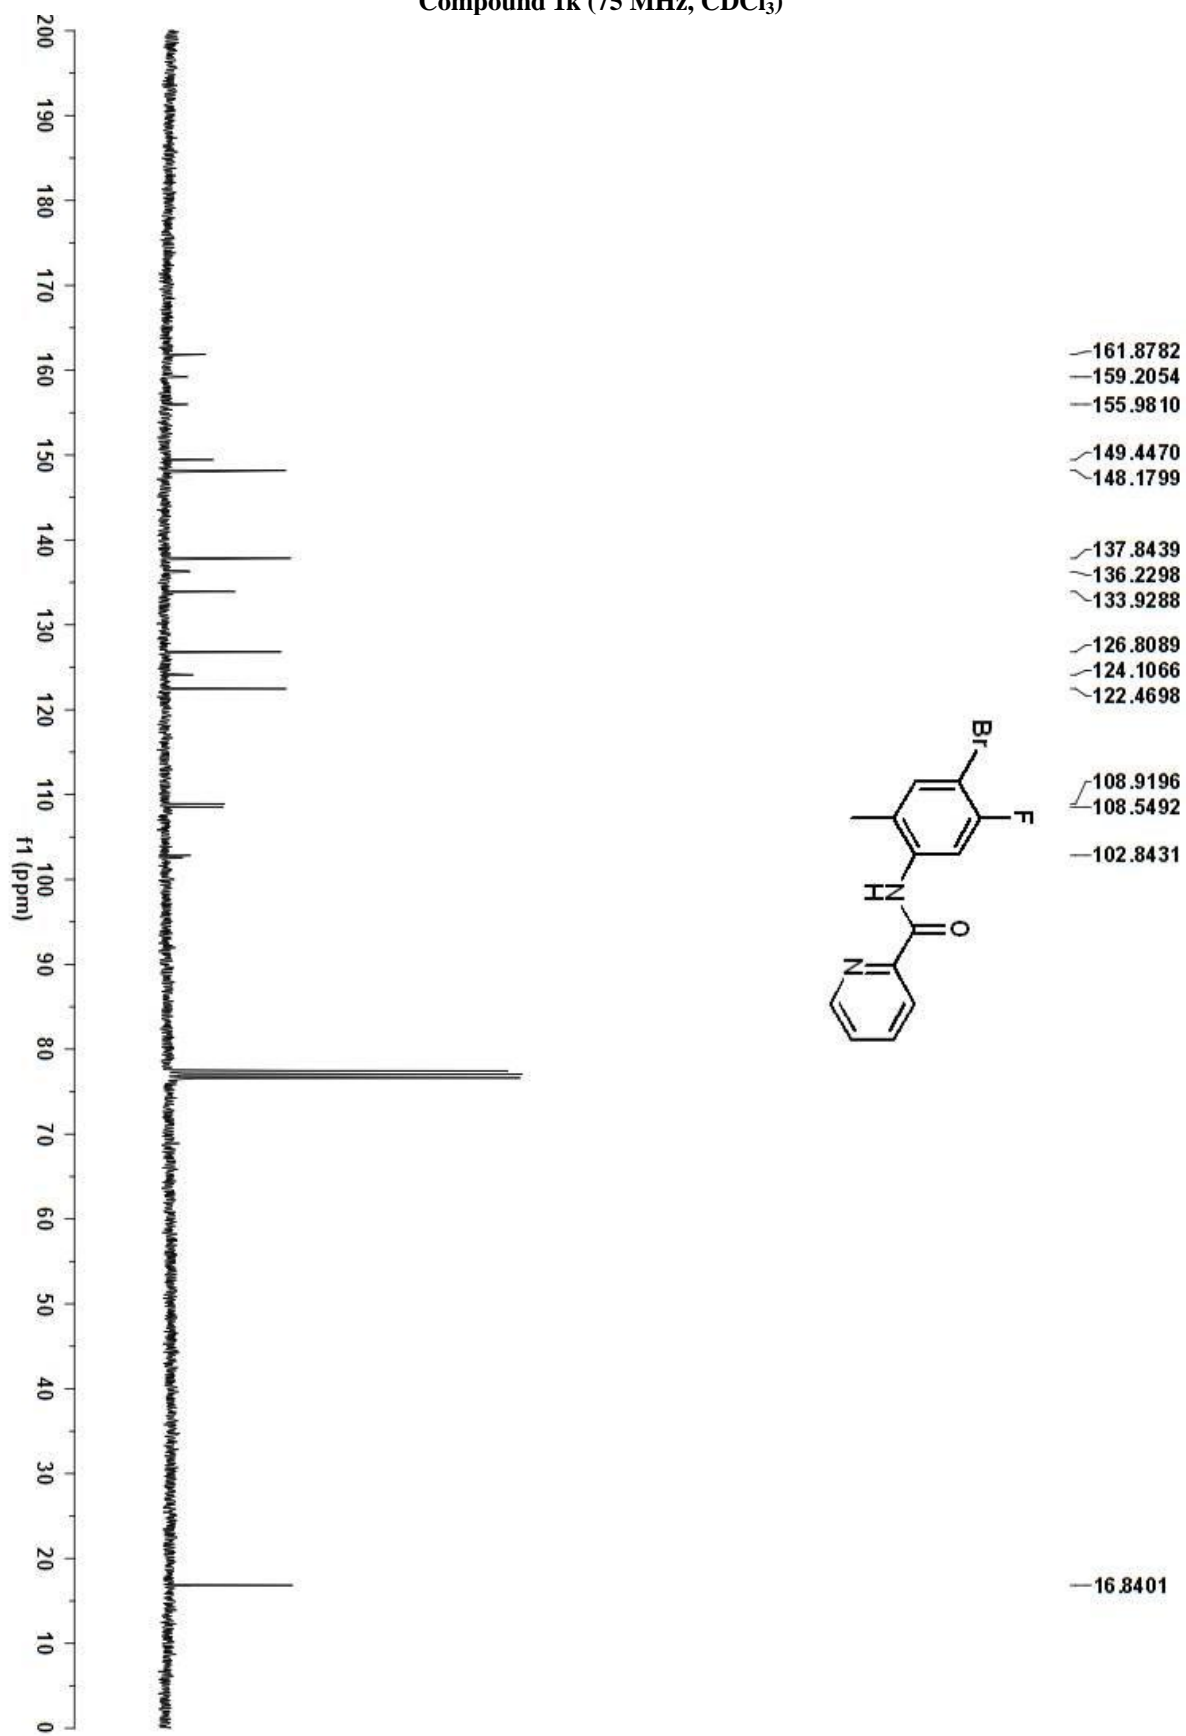

Compound 11 (300 MHz, CDCl<sub>3</sub>)

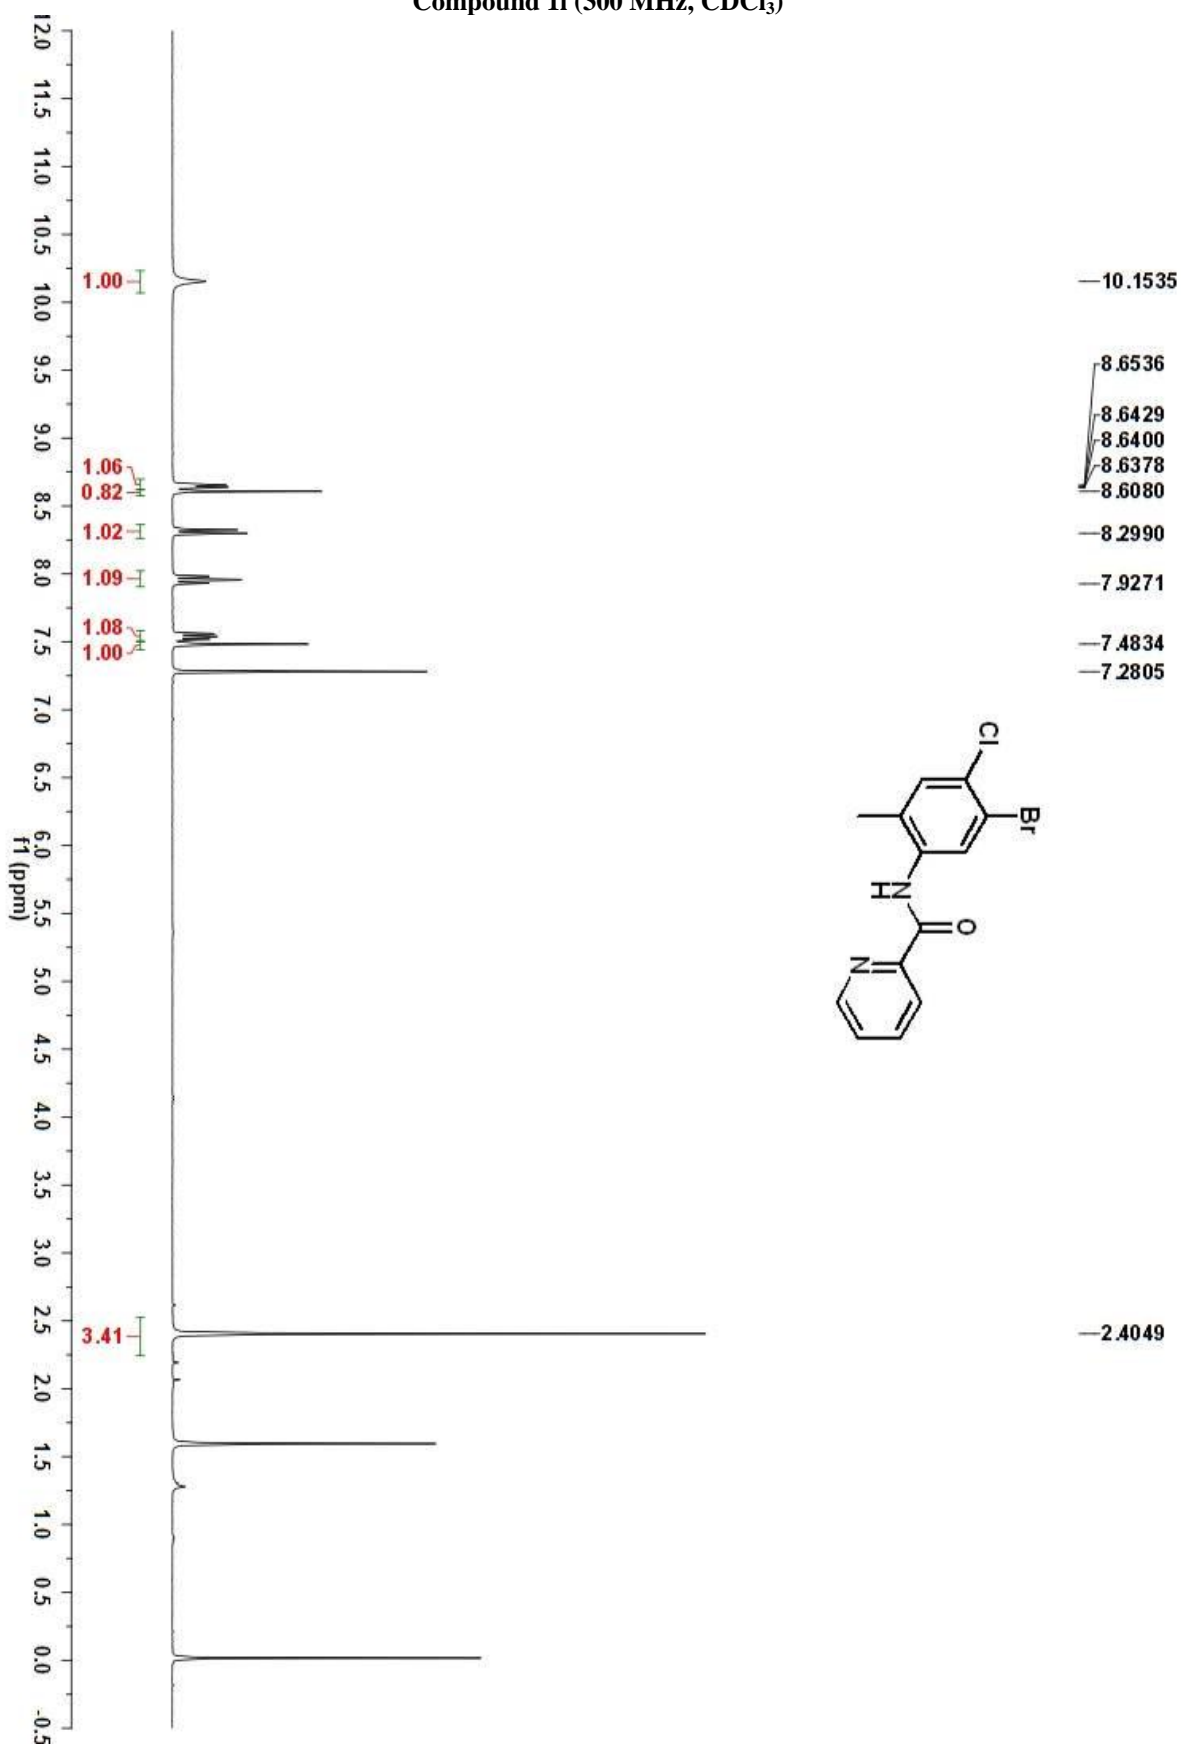

Compound 1l (75 MHz, CDCl<sub>3</sub>)

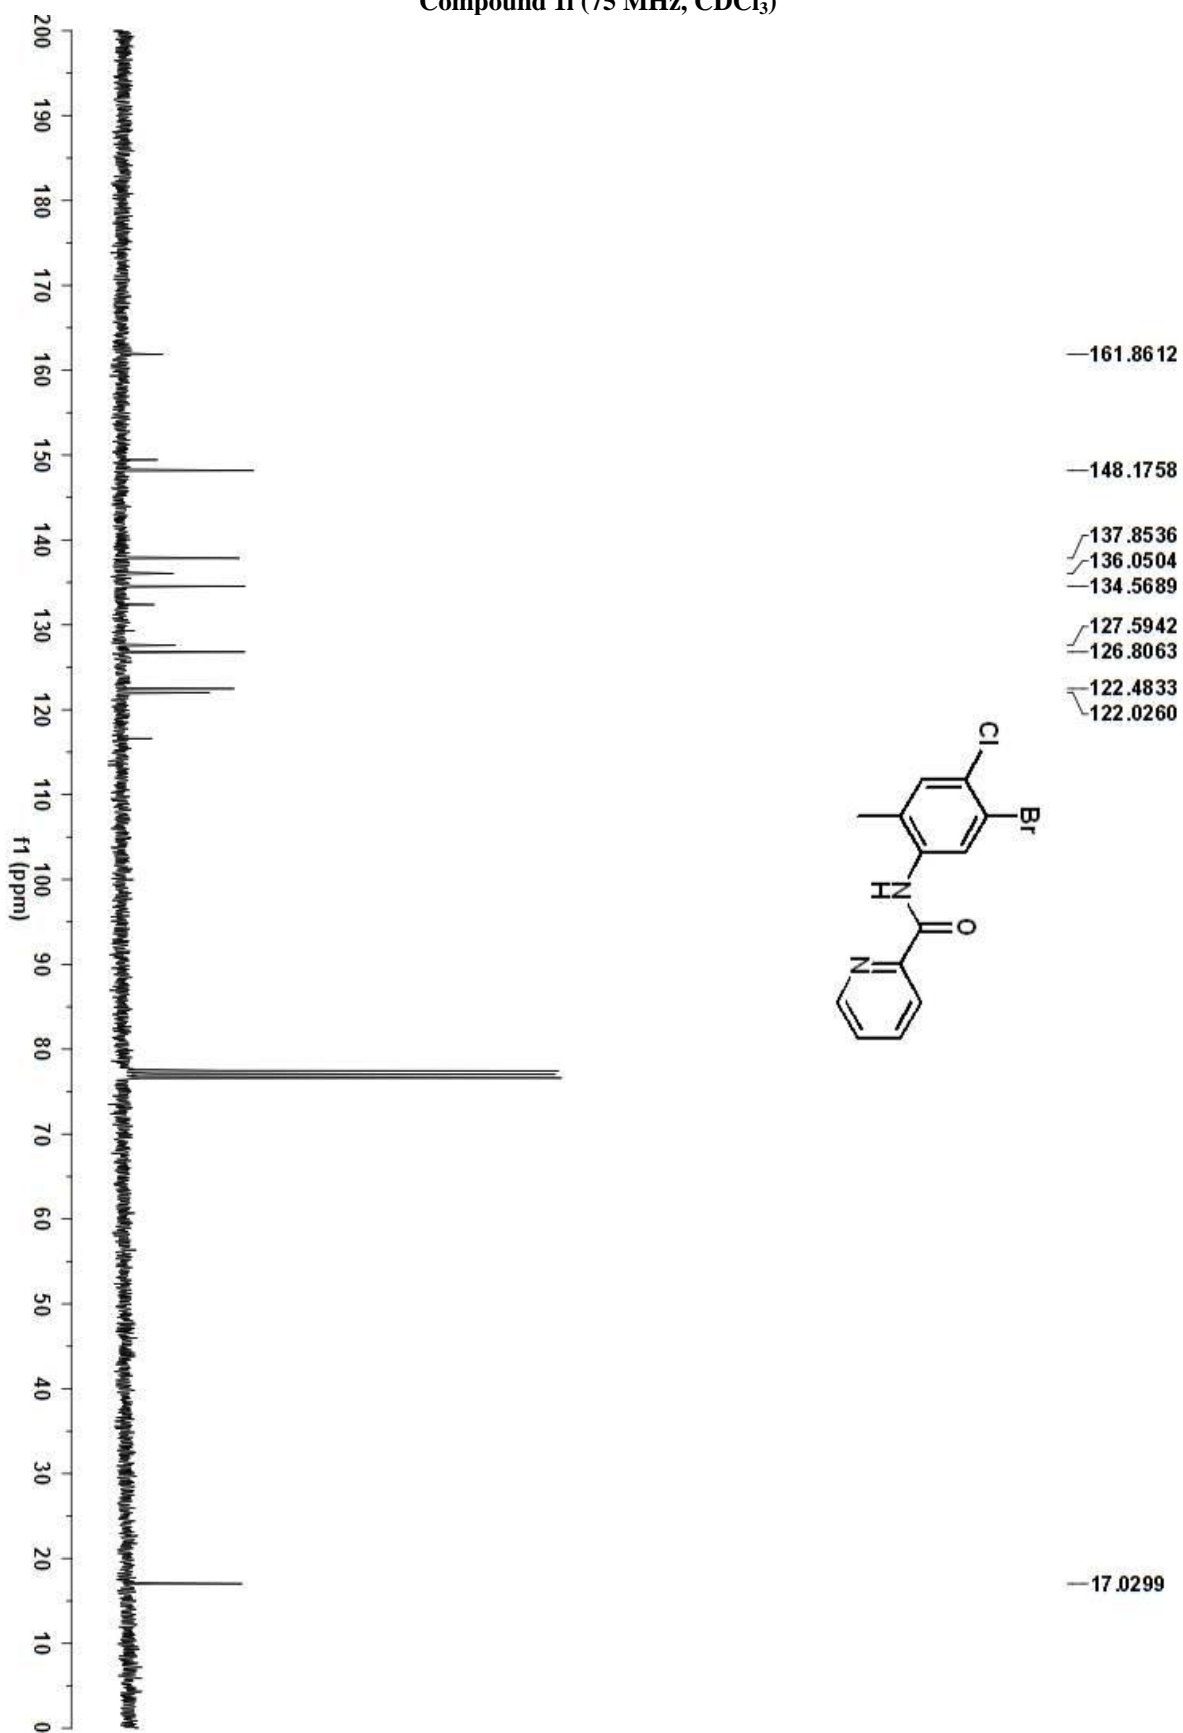

Compound 1m (300 MHz, CDCl<sub>3</sub>)

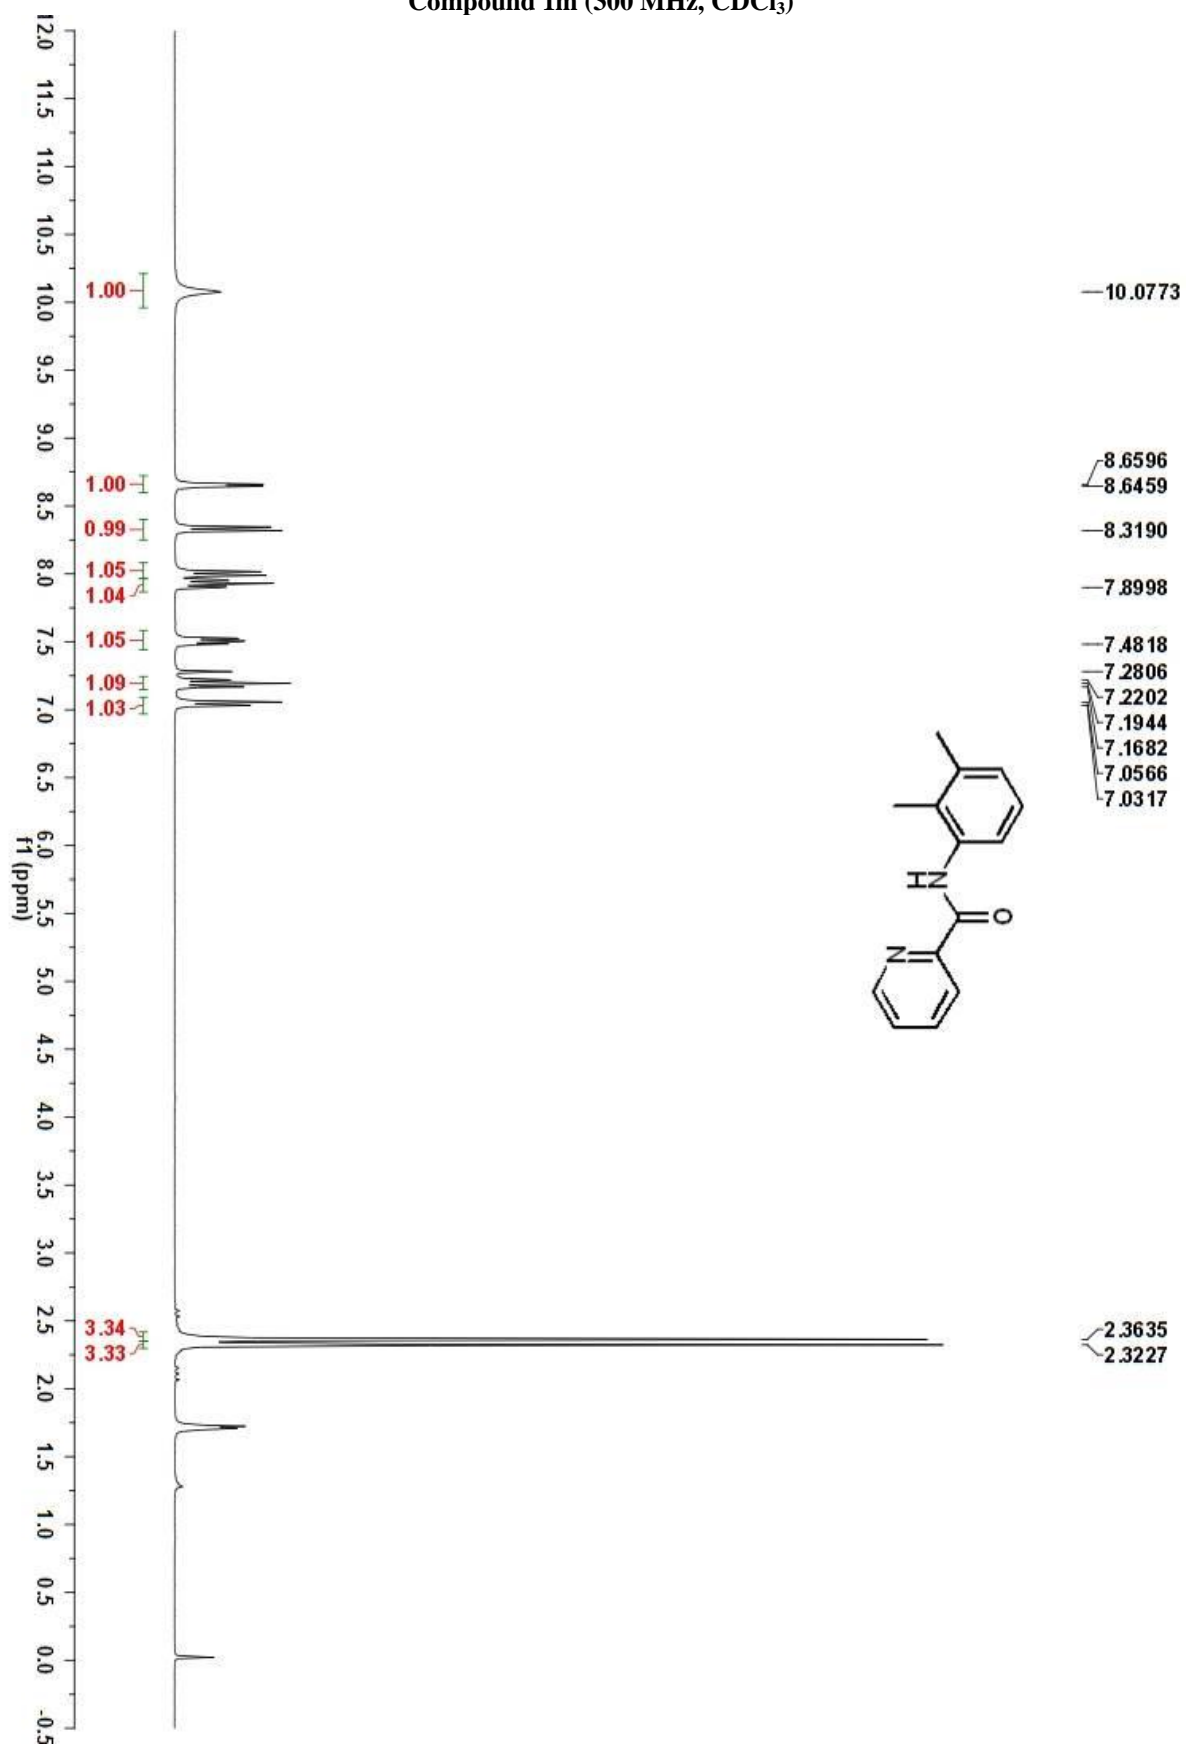

Compound 1m (75 MHz, CDCl<sub>3</sub>)

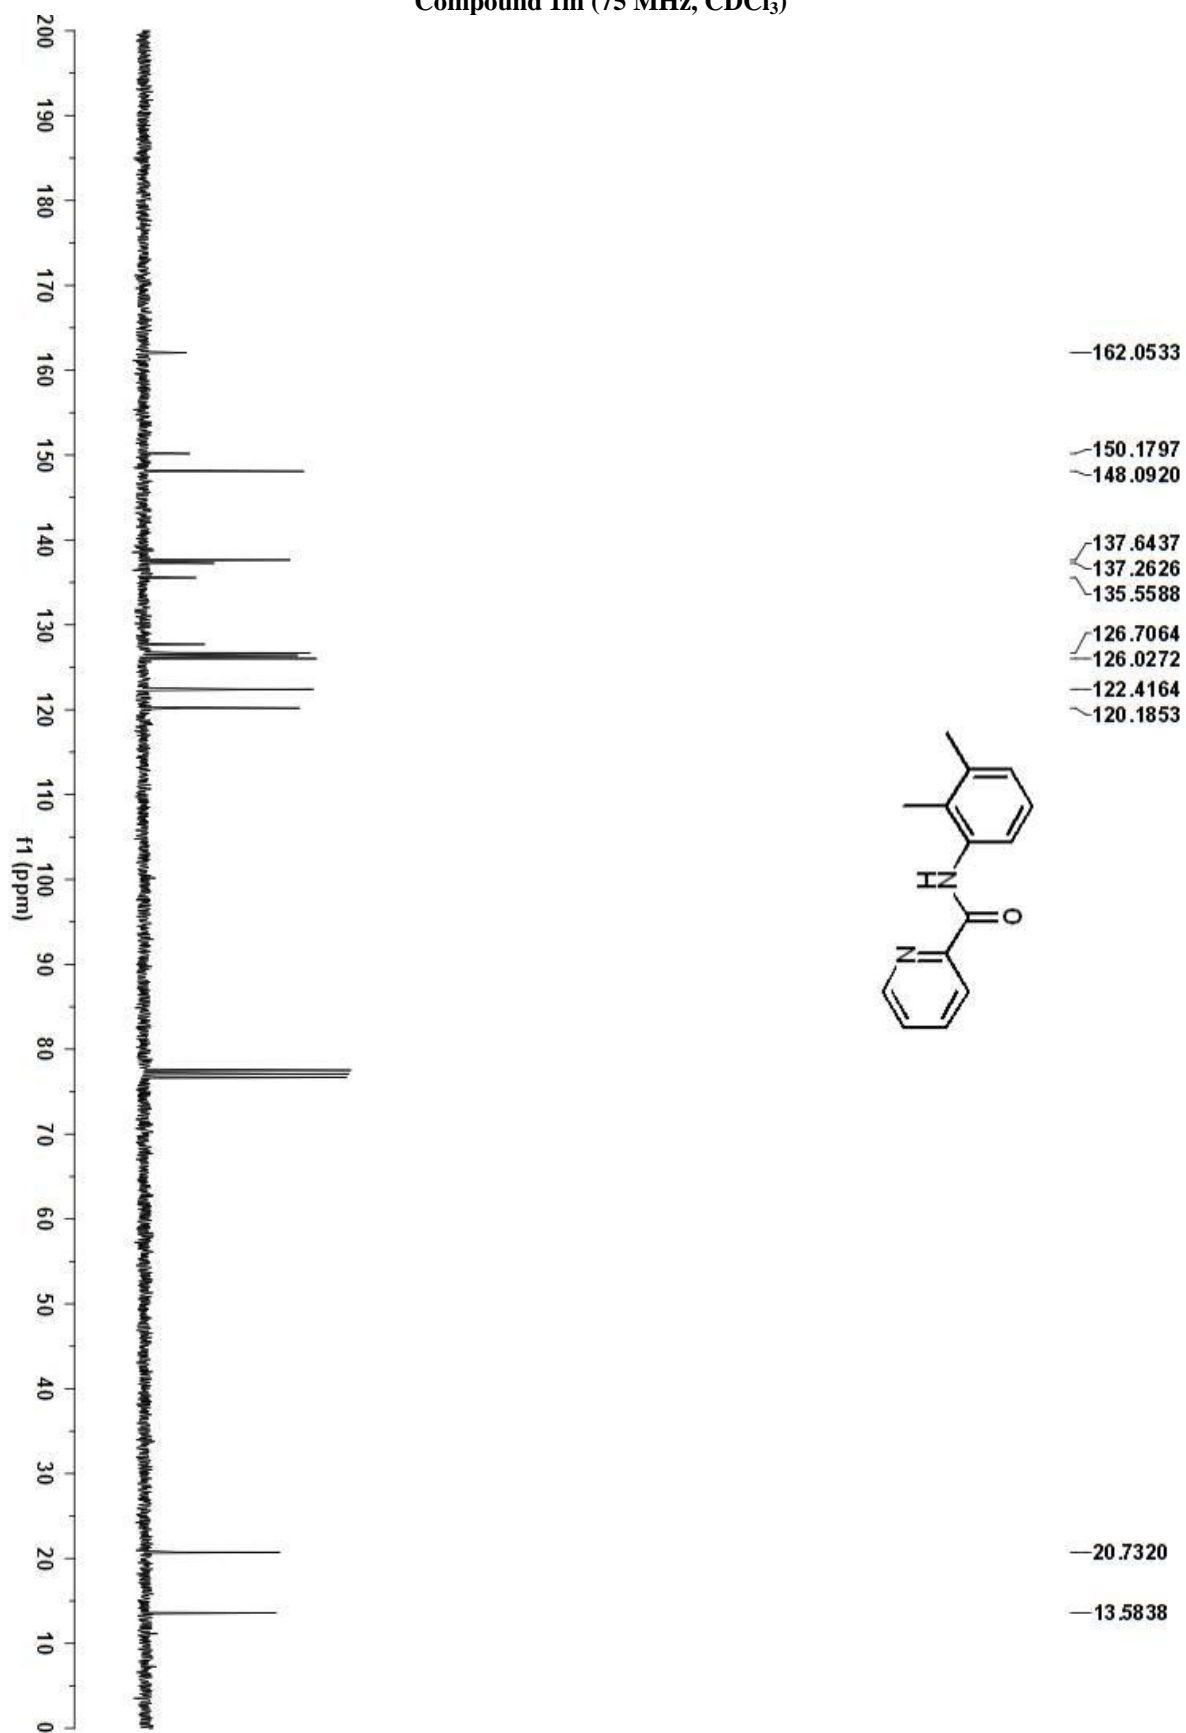



Compound 1n (300 MHz, CDCl<sub>3</sub>)

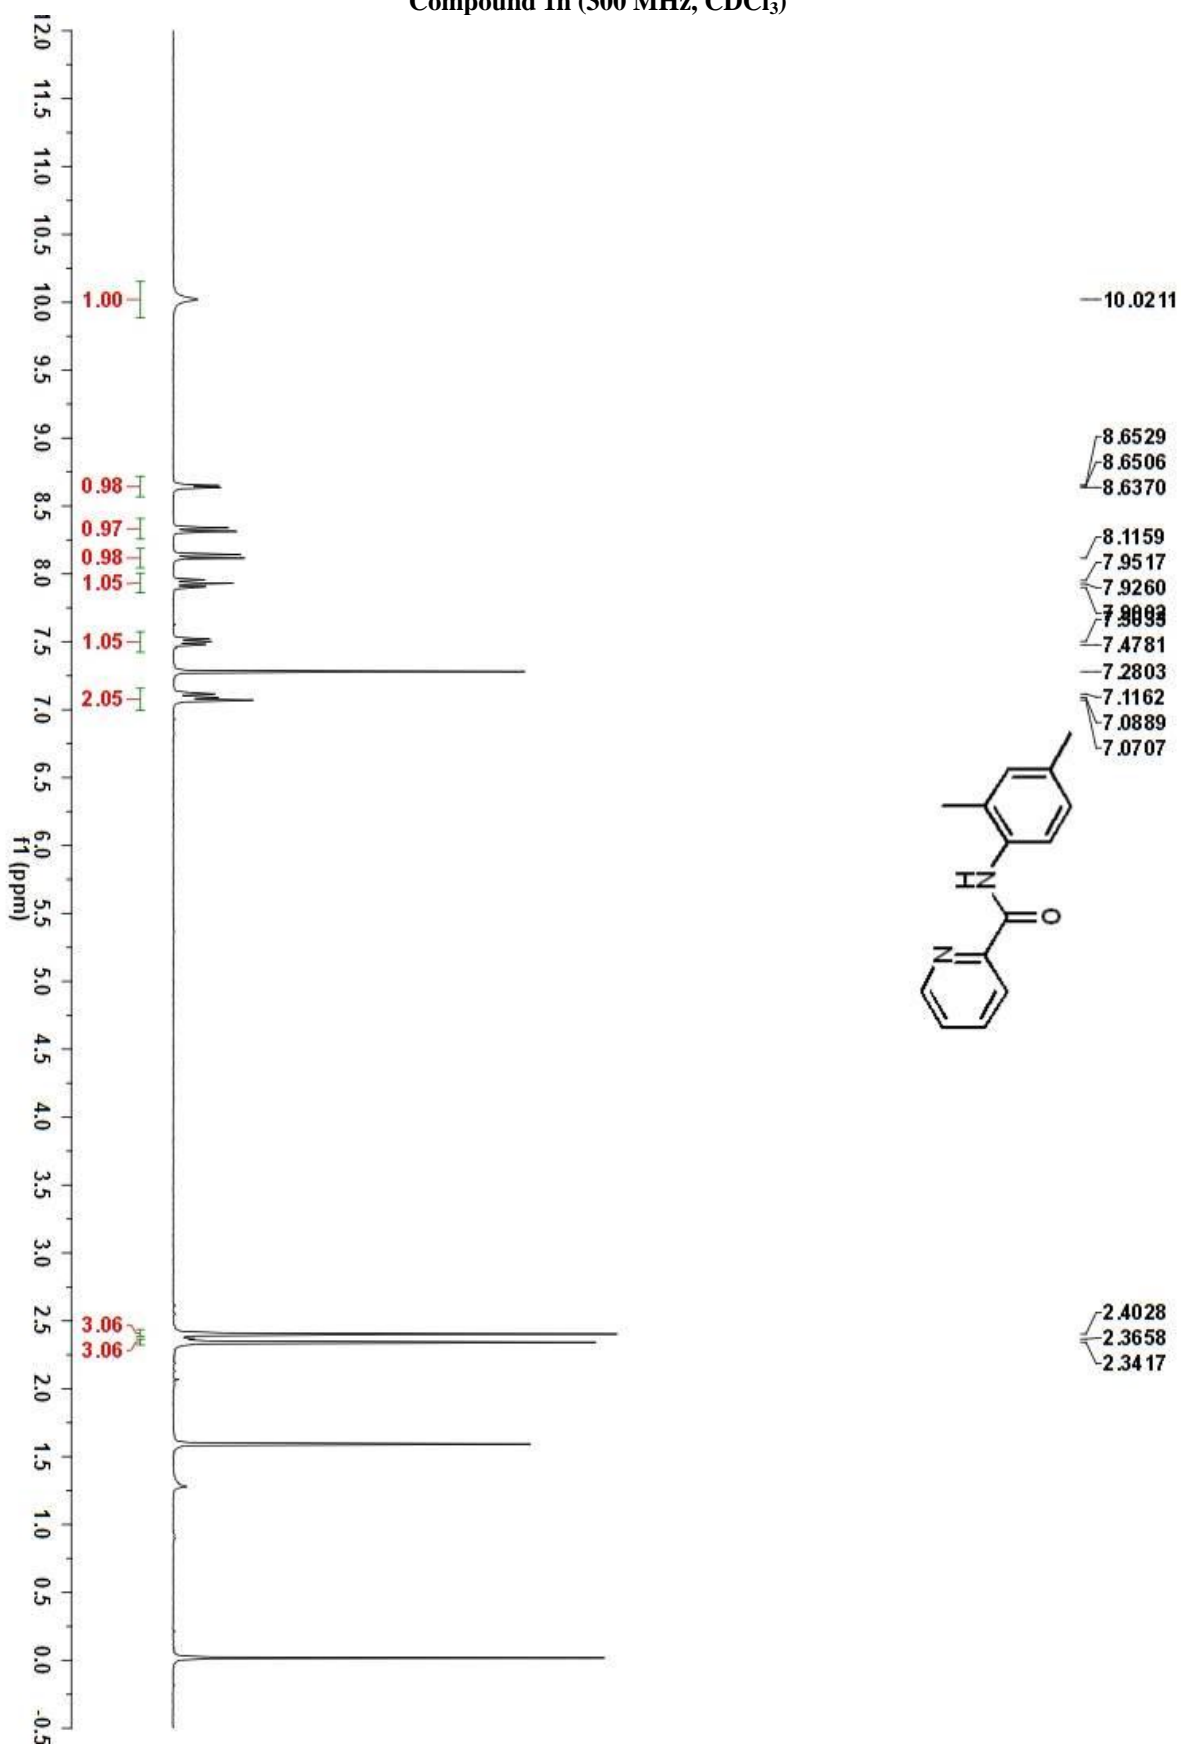

Compound 1n (75 MHz, CDCl<sub>3</sub>)

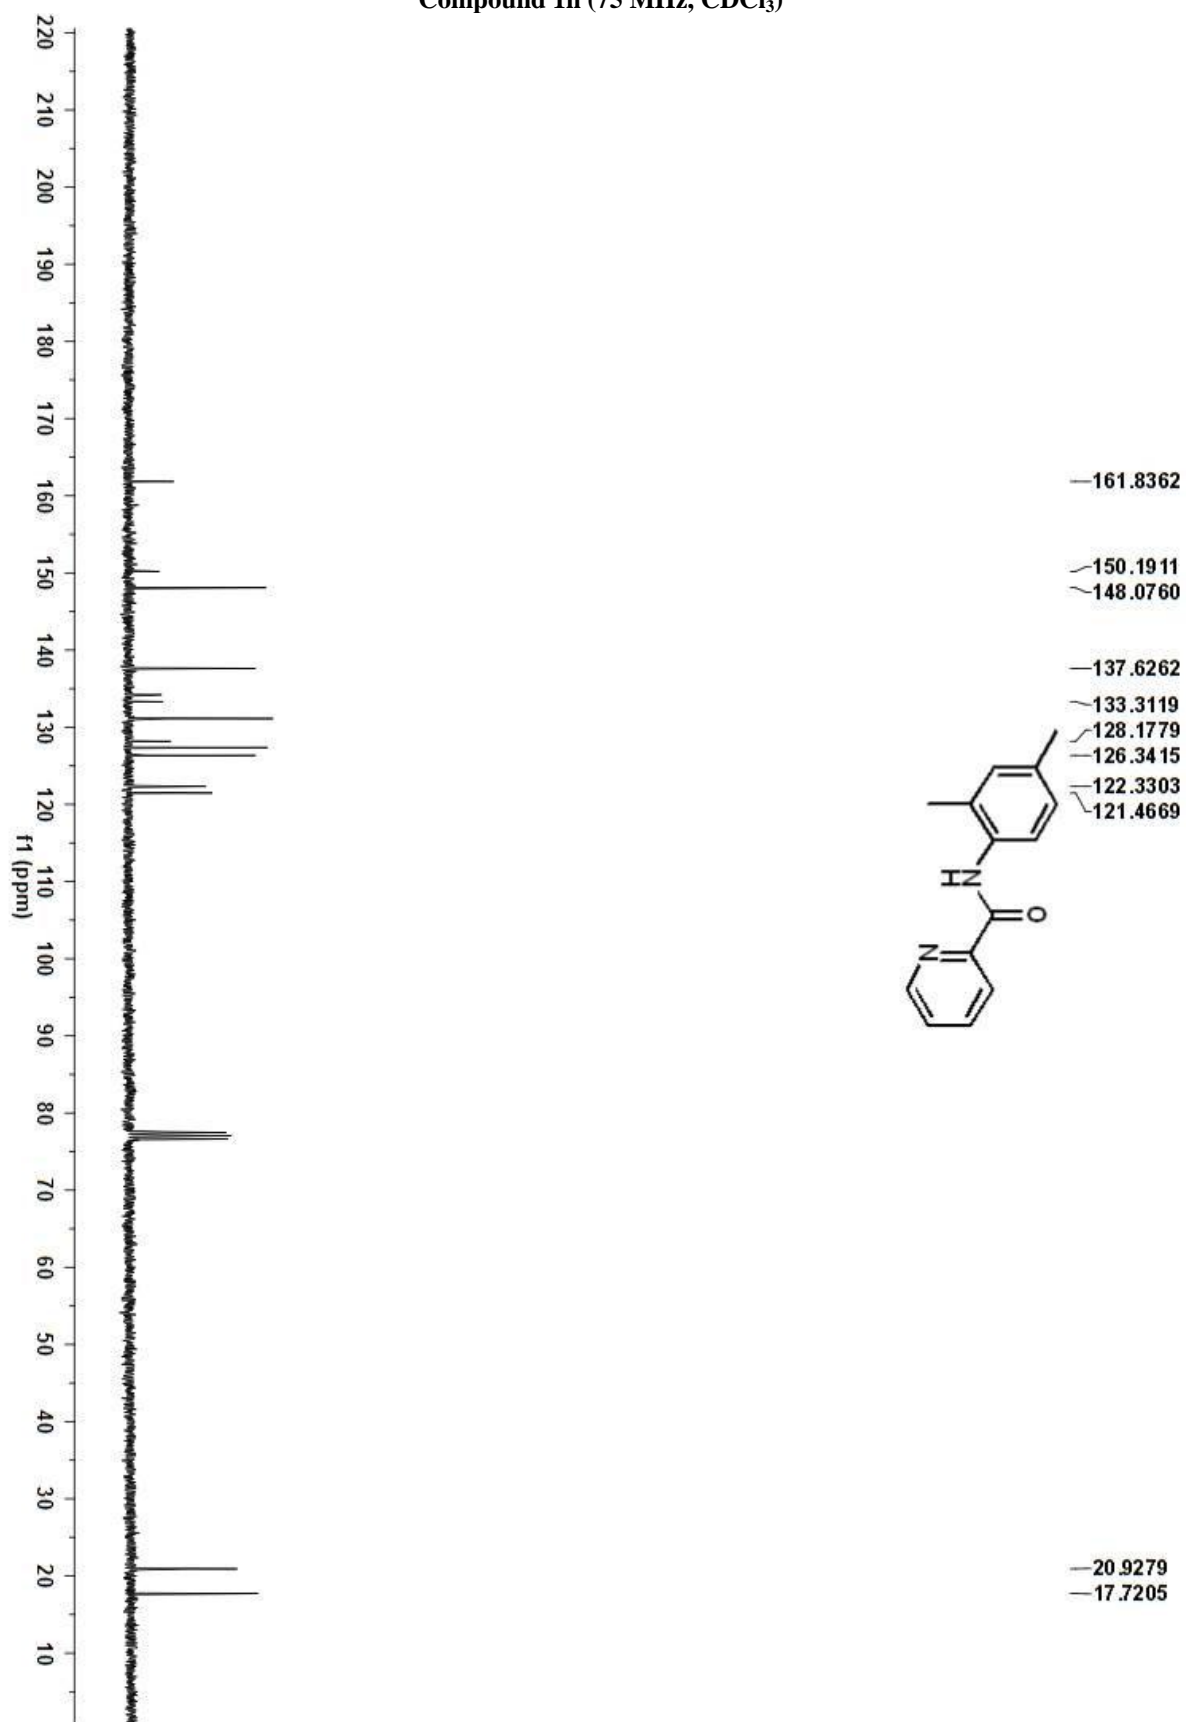

Compound 1o (300 MHz, CDCl<sub>3</sub>)

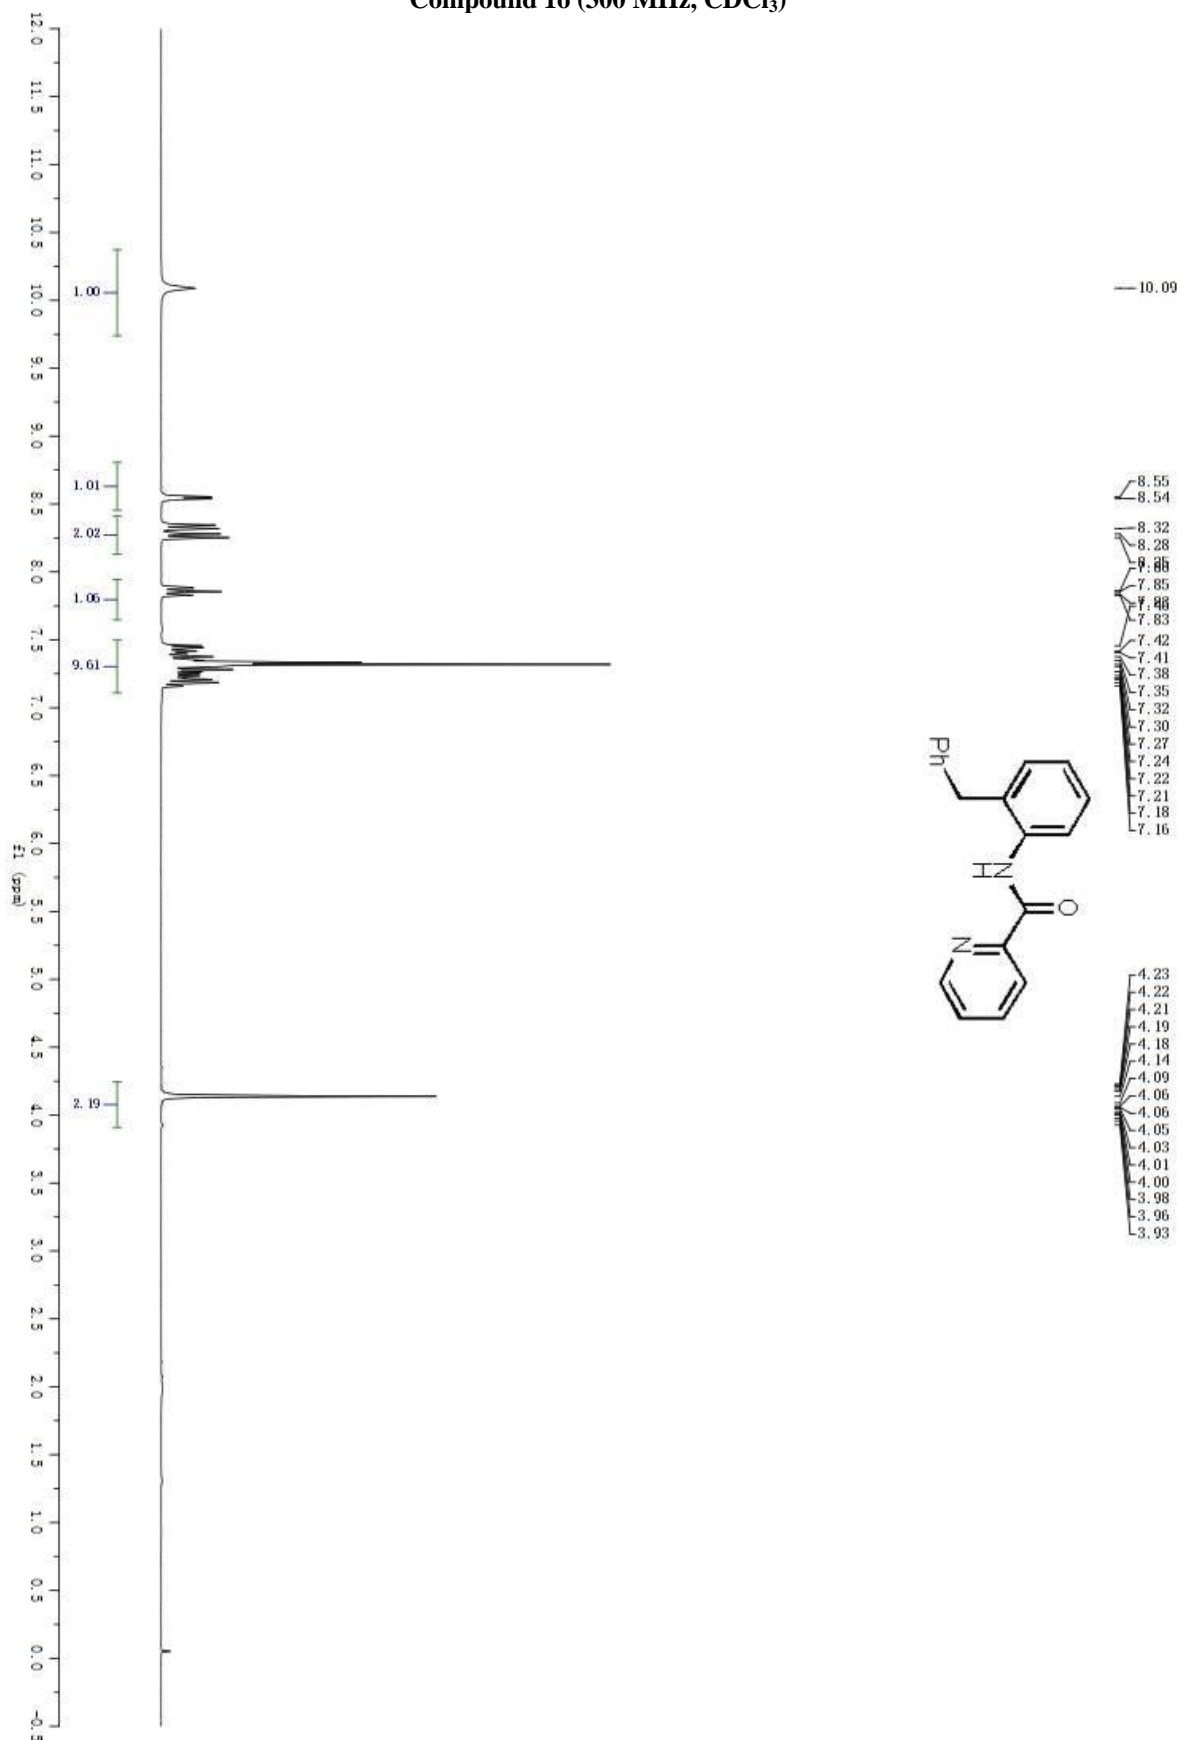

Compound 1o (75 MHz, CDCl<sub>3</sub>)

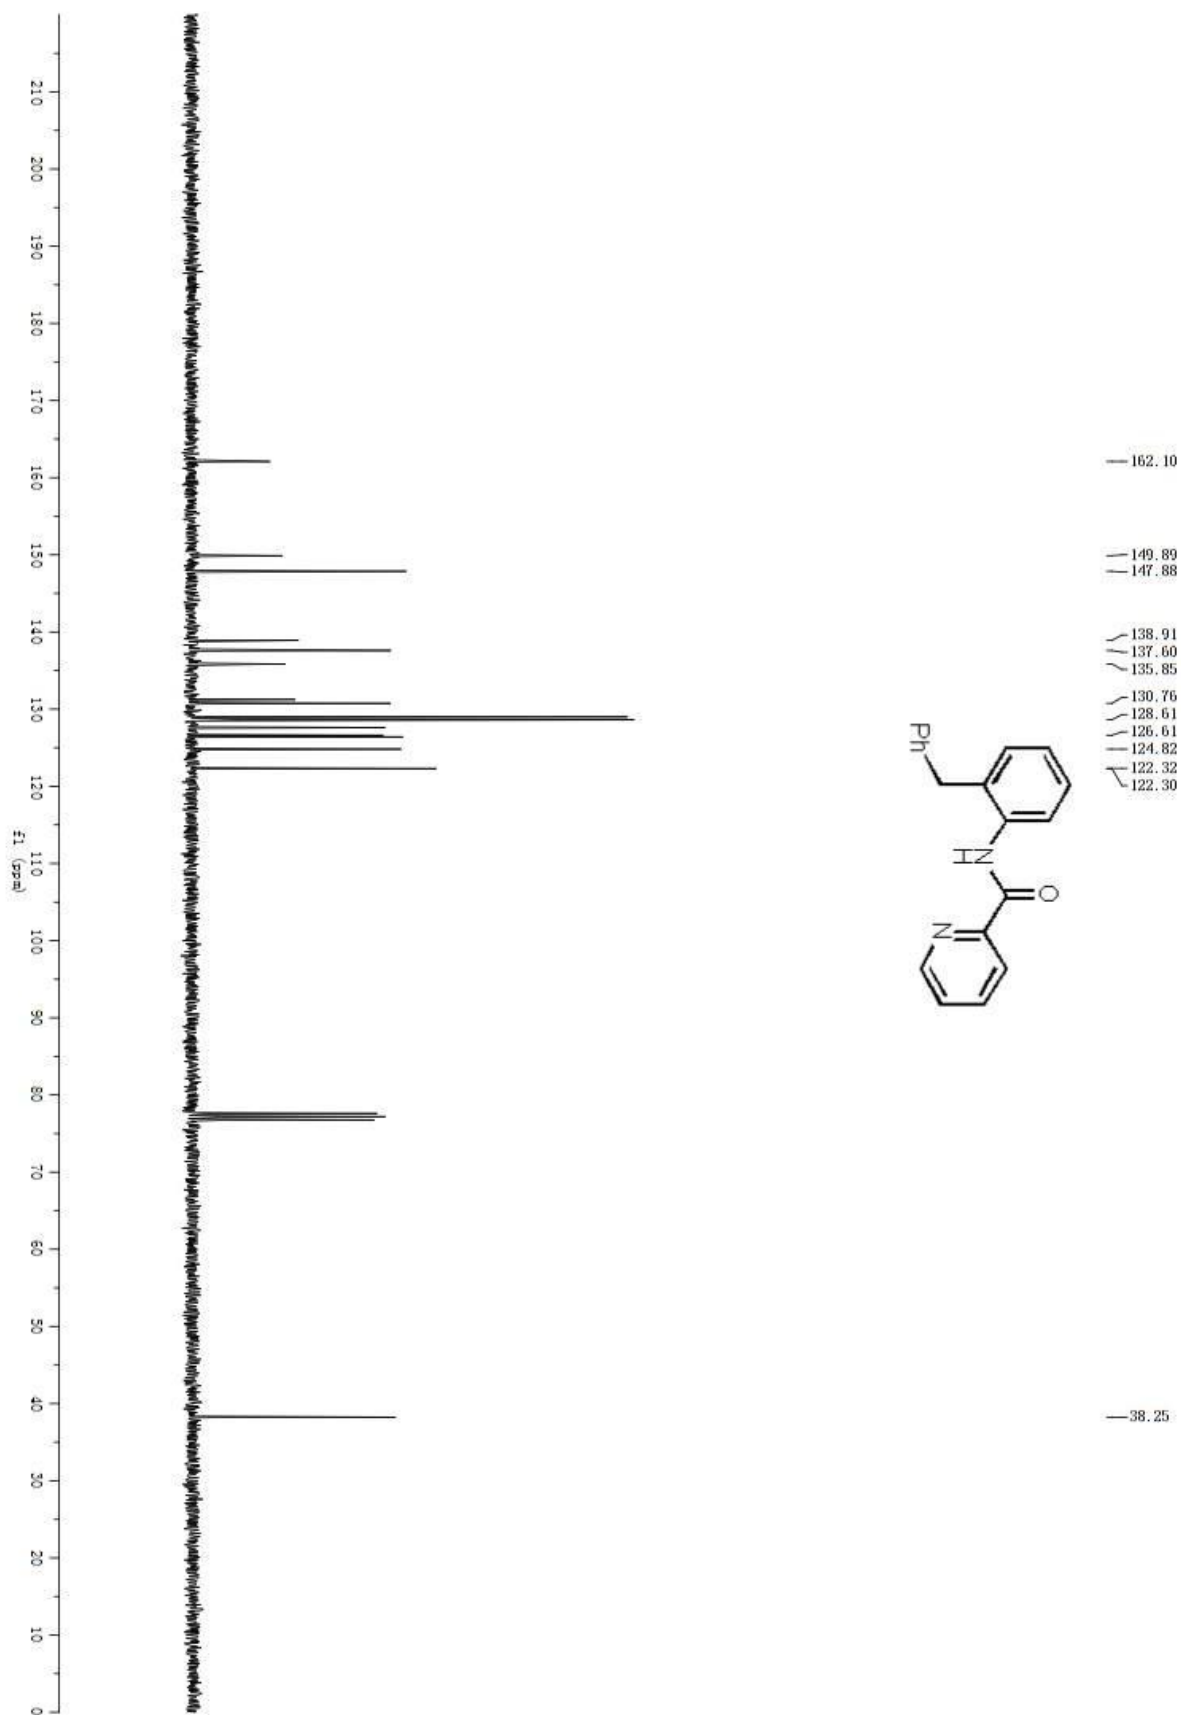

Compound 1p (300 MHz, CDCl<sub>3</sub>)

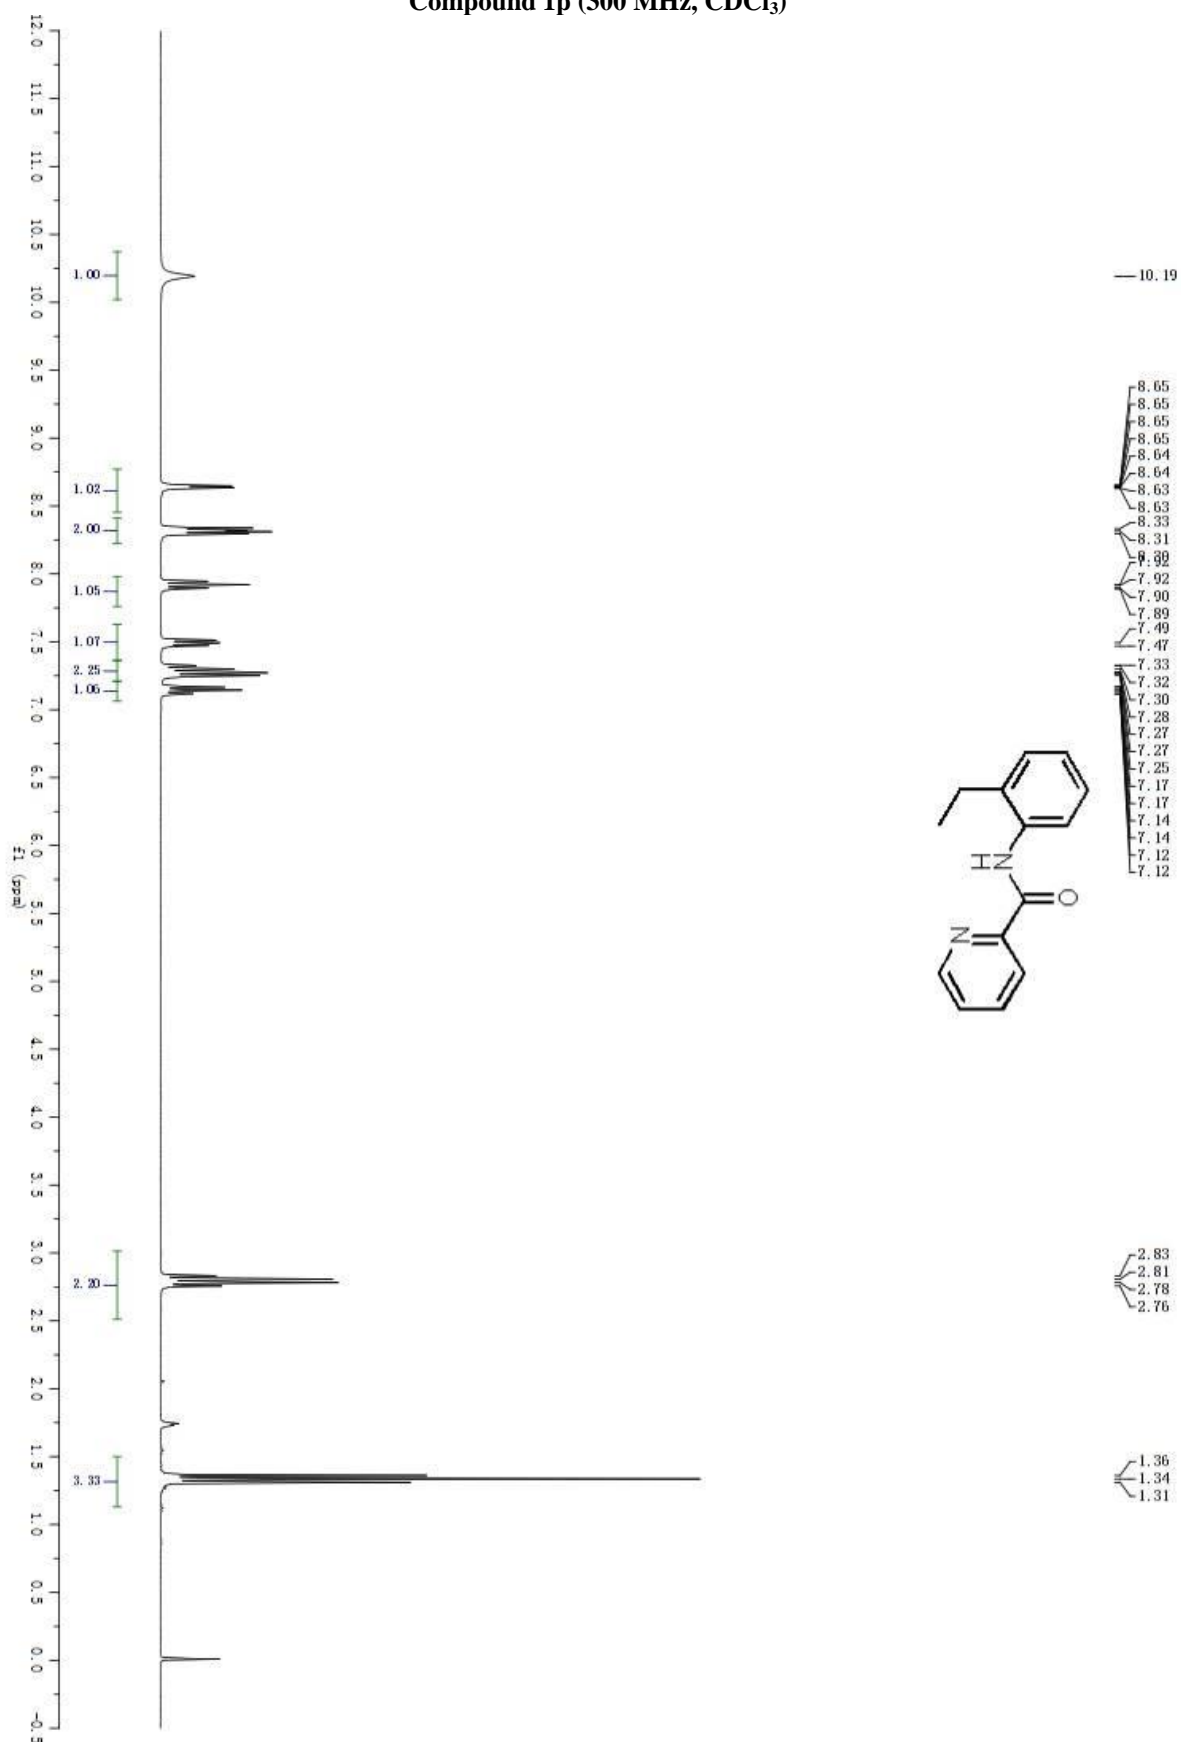

Compound 1p (75 MHz, CDCl<sub>3</sub>)

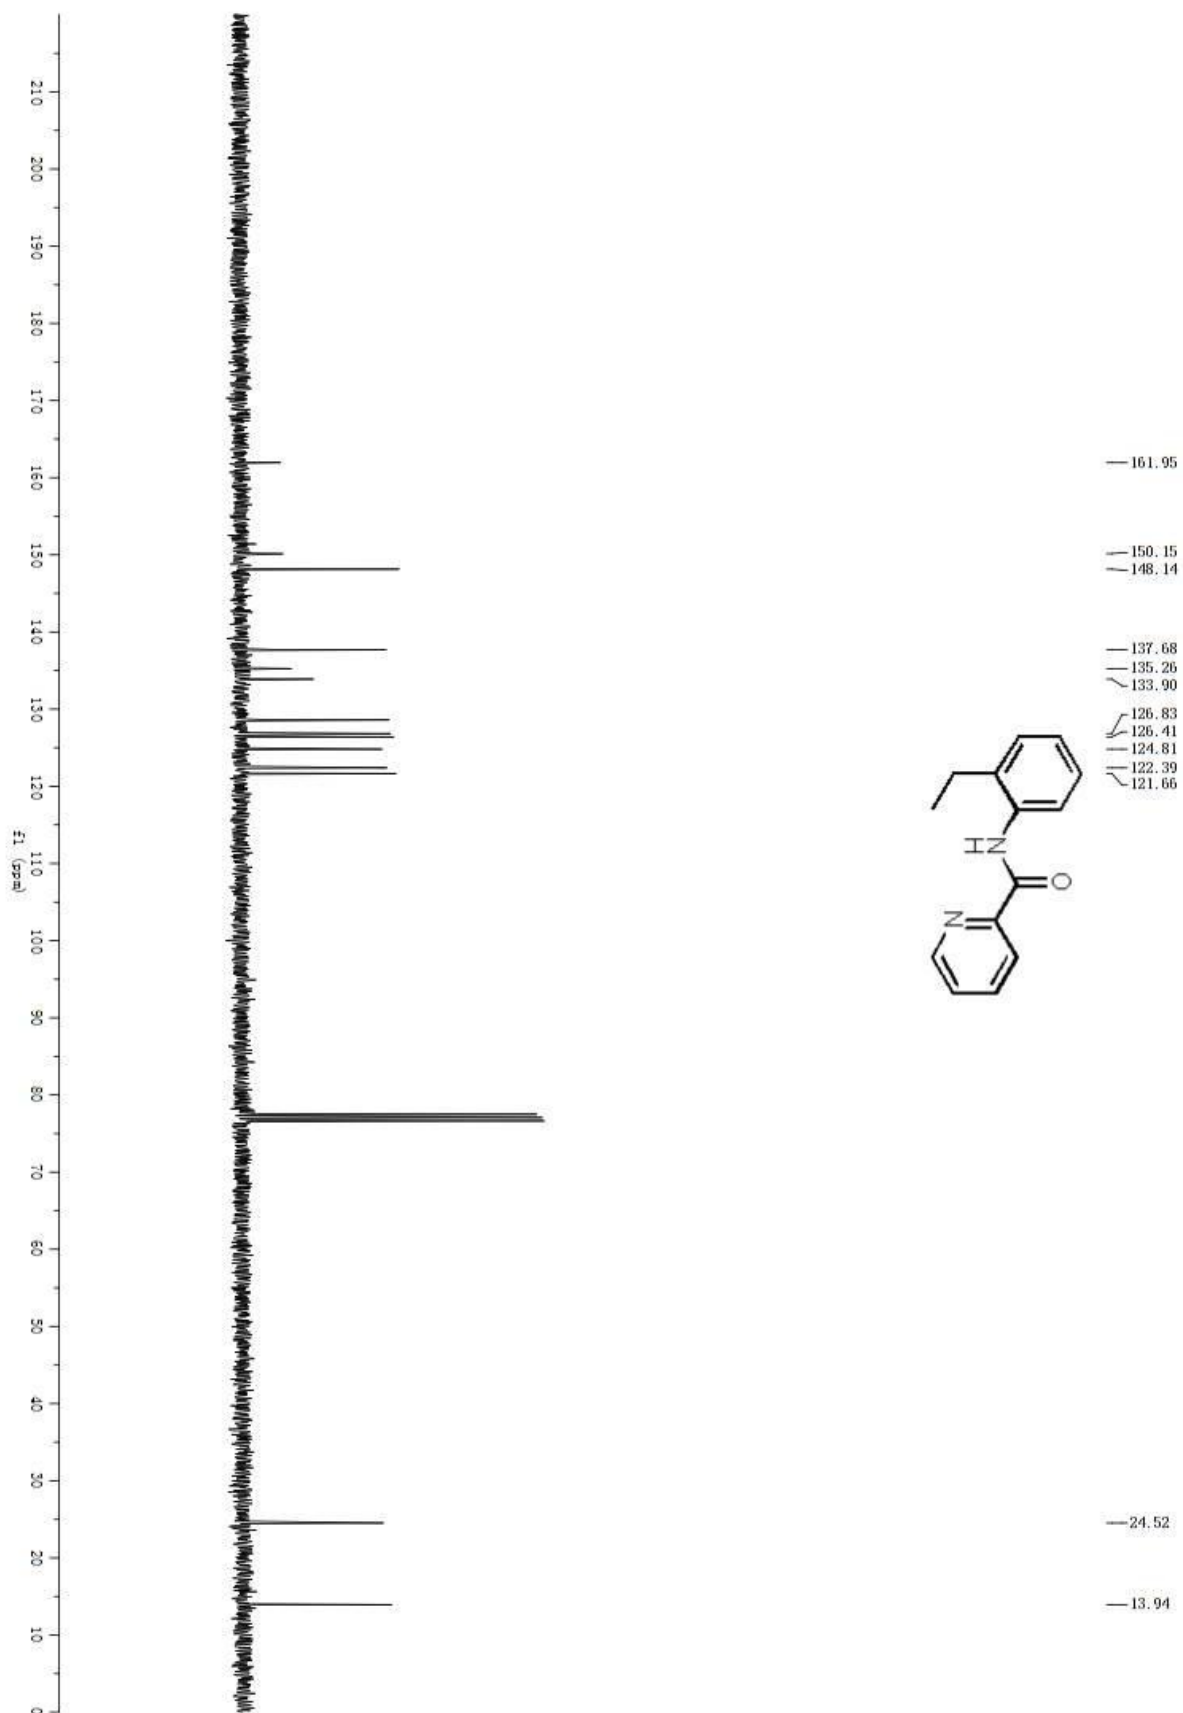

Compound 1q (300 MHz, CDCl<sub>3</sub>)

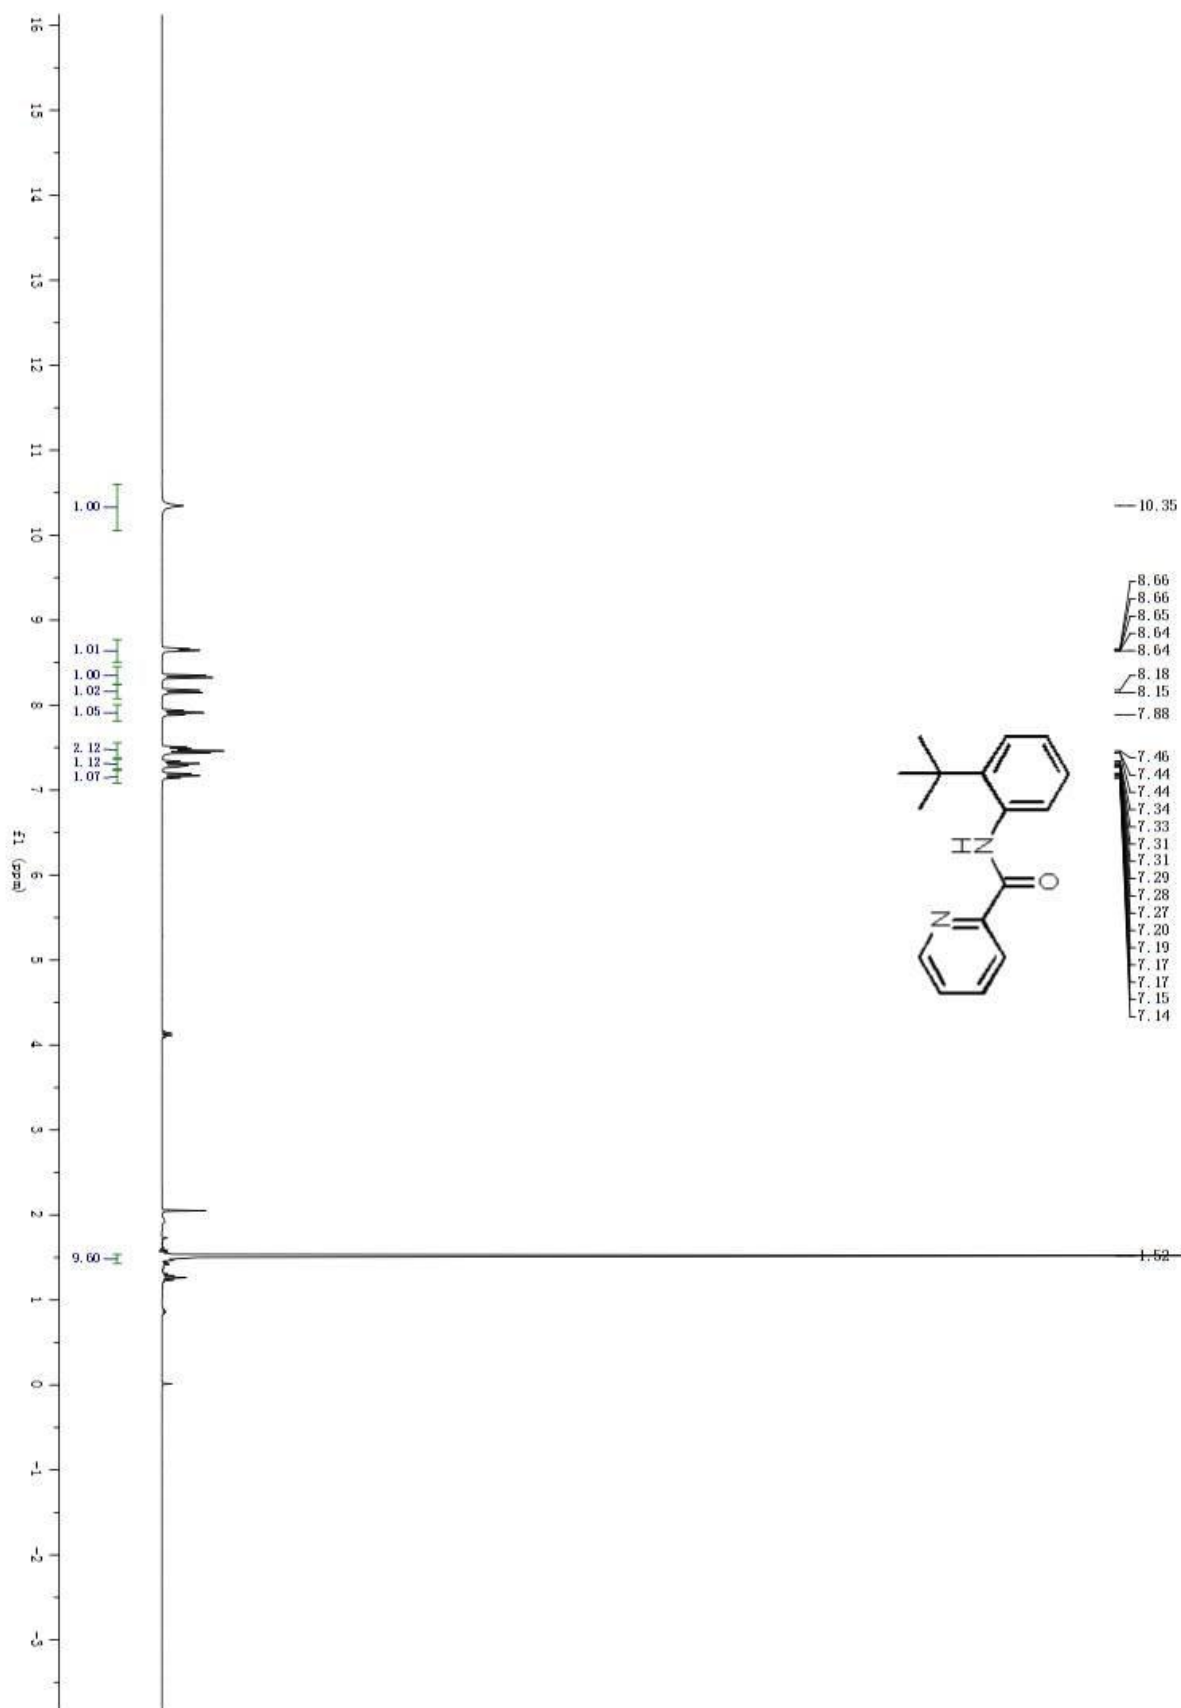

Compound 1q (75 MHz, CDCl<sub>3</sub>)

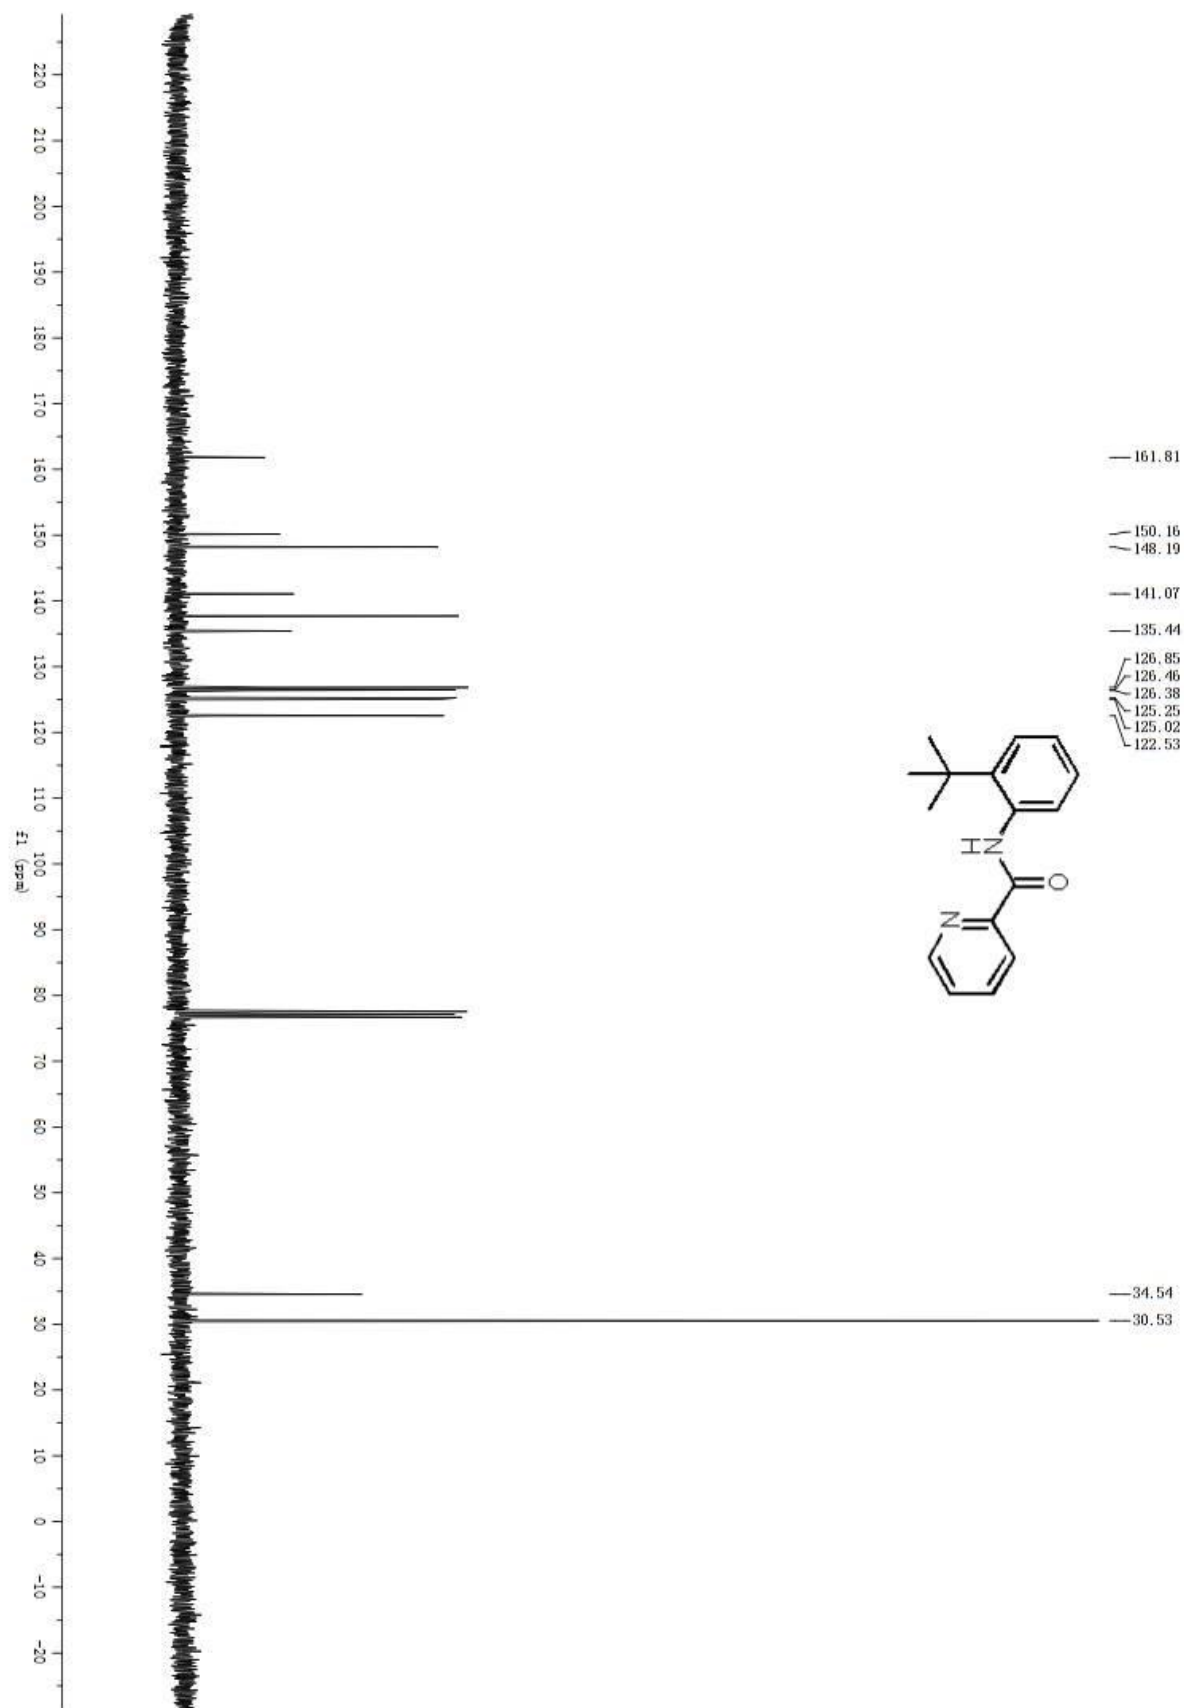



Compound 1r (300 MHz, CDCl<sub>3</sub>)

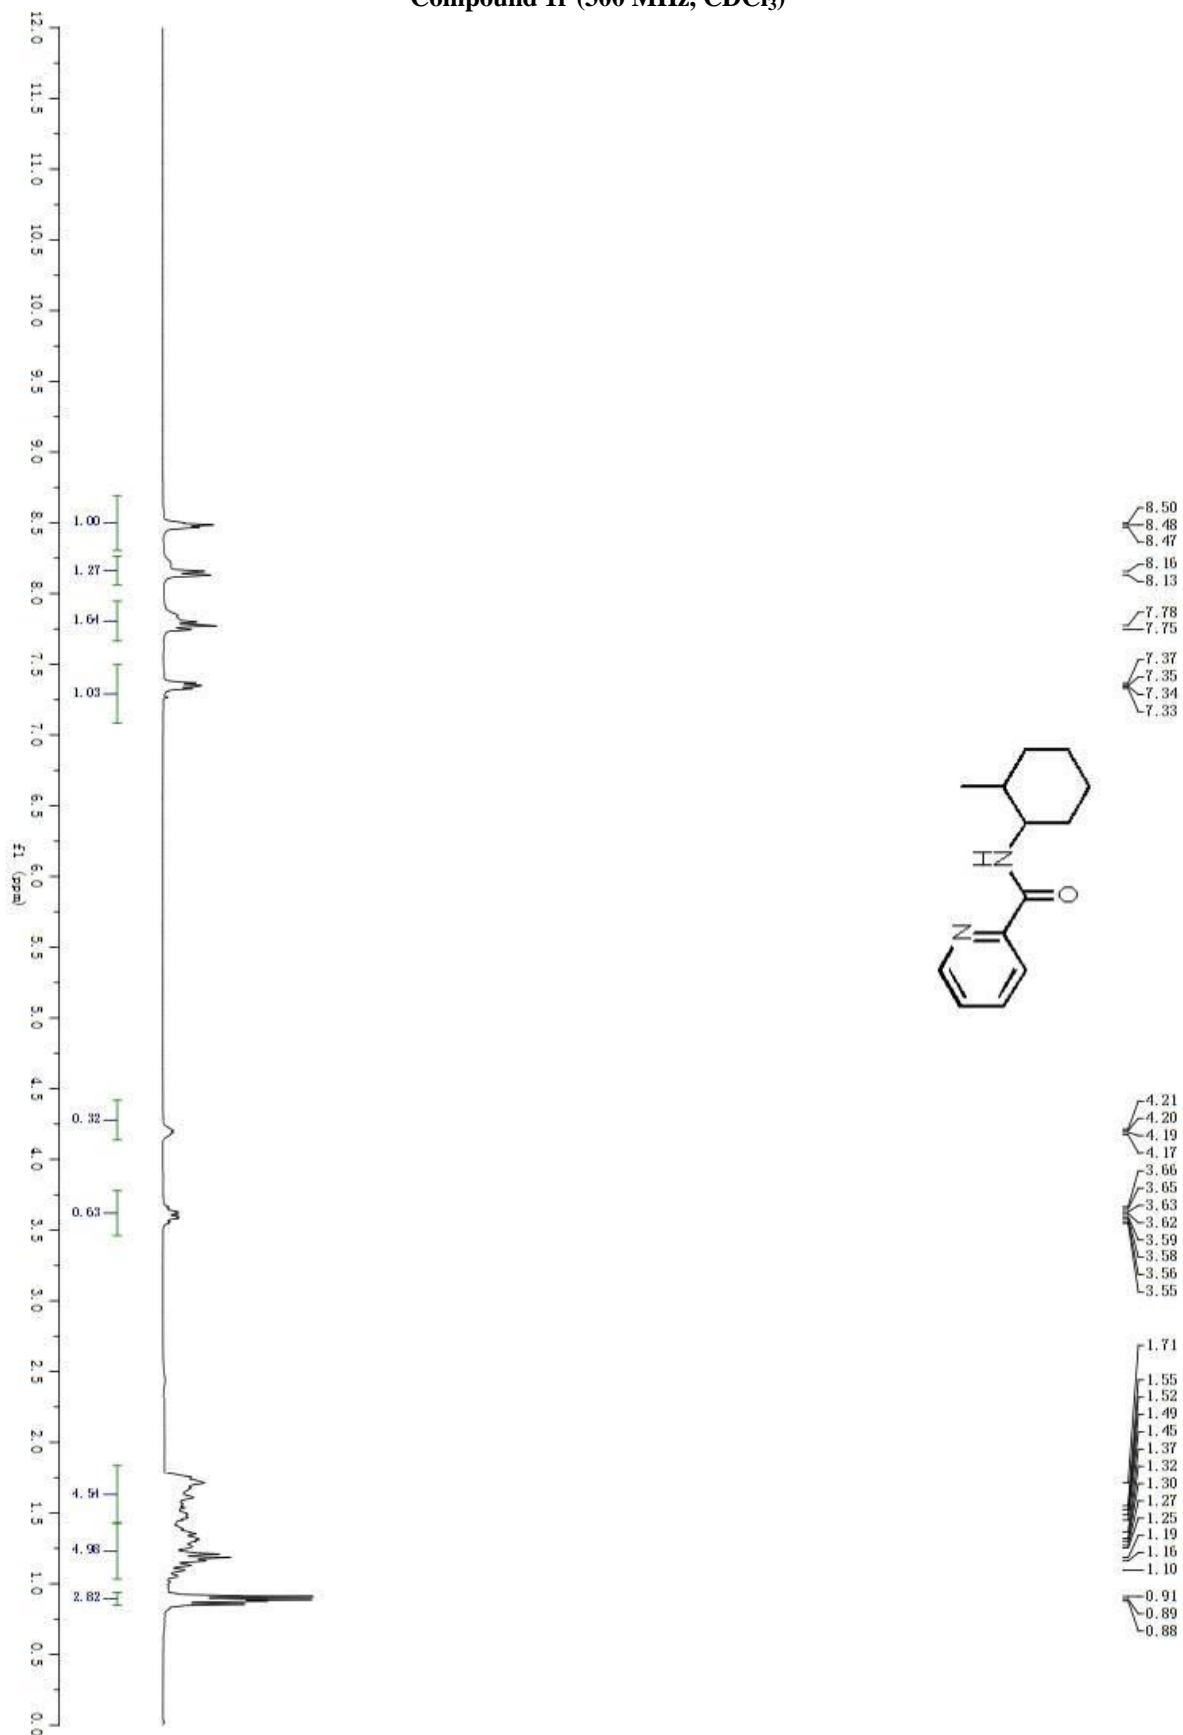

Compound 1r (75 MHz, CDCl<sub>3</sub>)

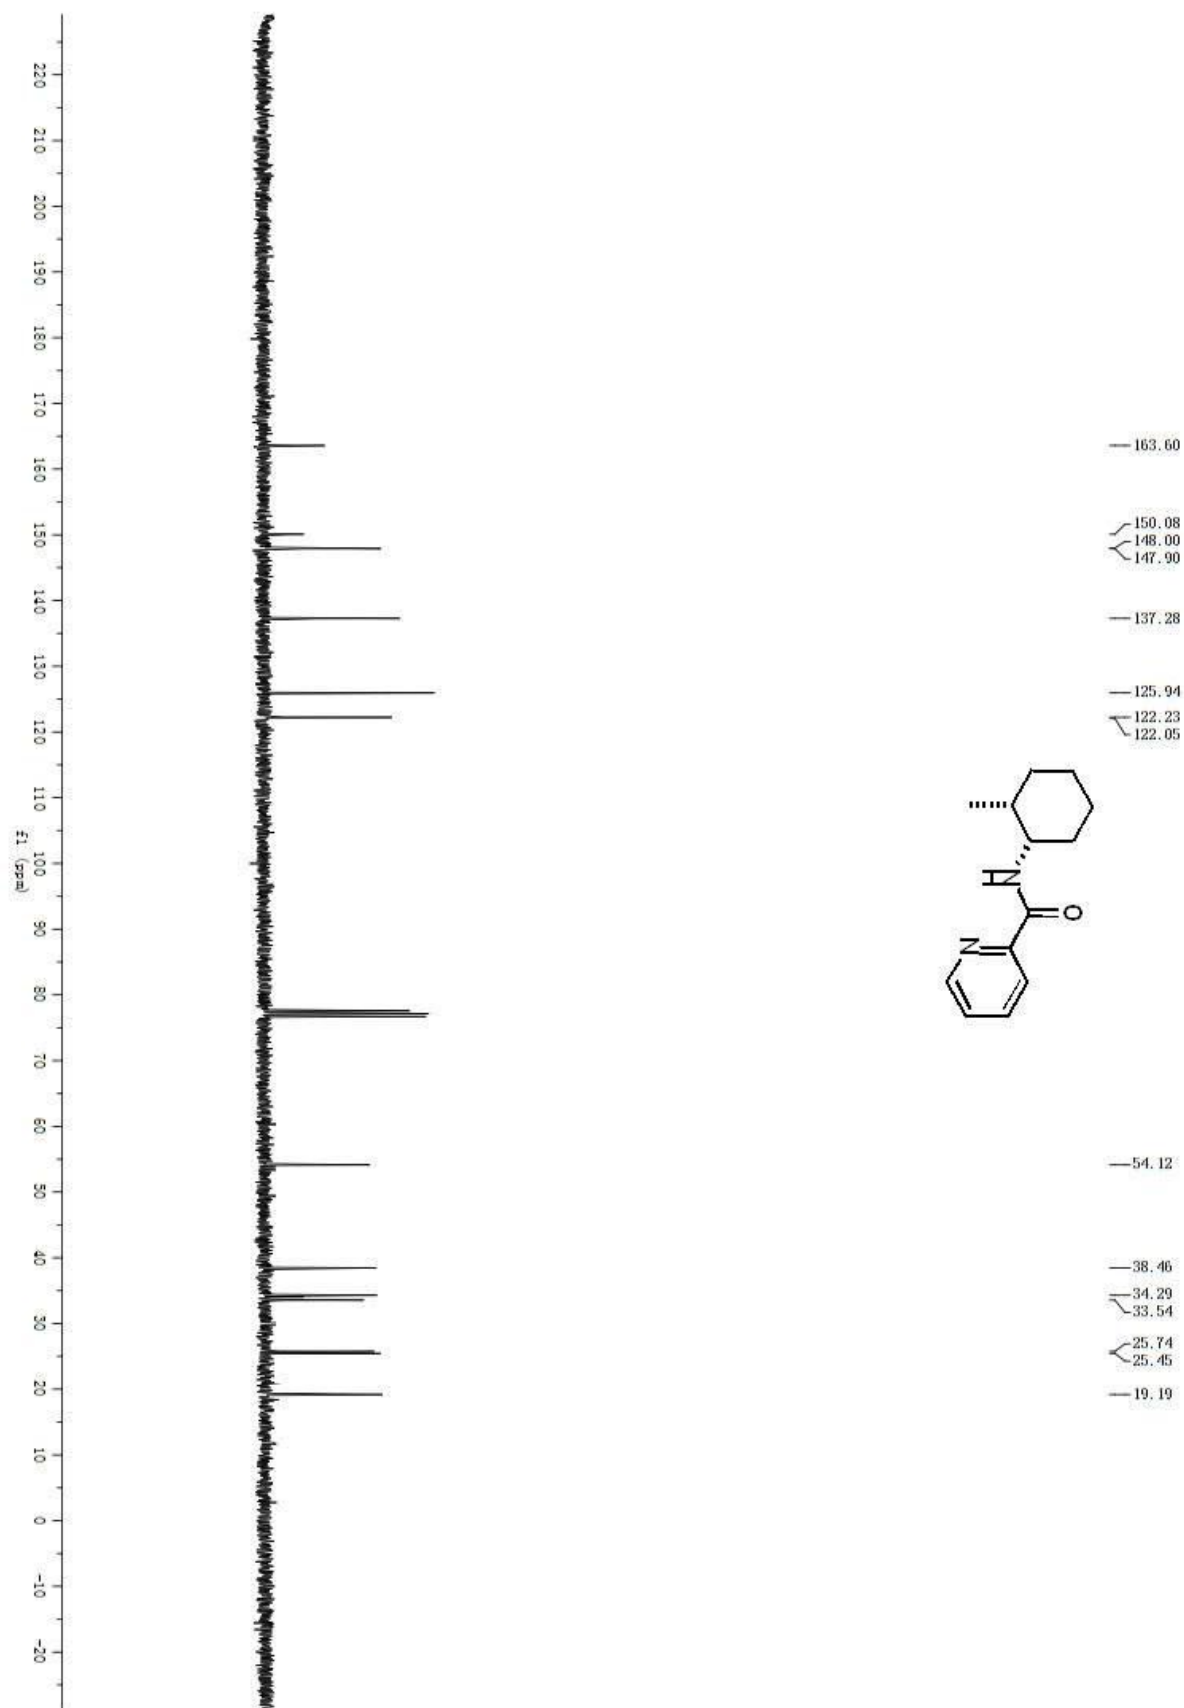

Compound 1s (300 MHz, CDCl<sub>3</sub>)

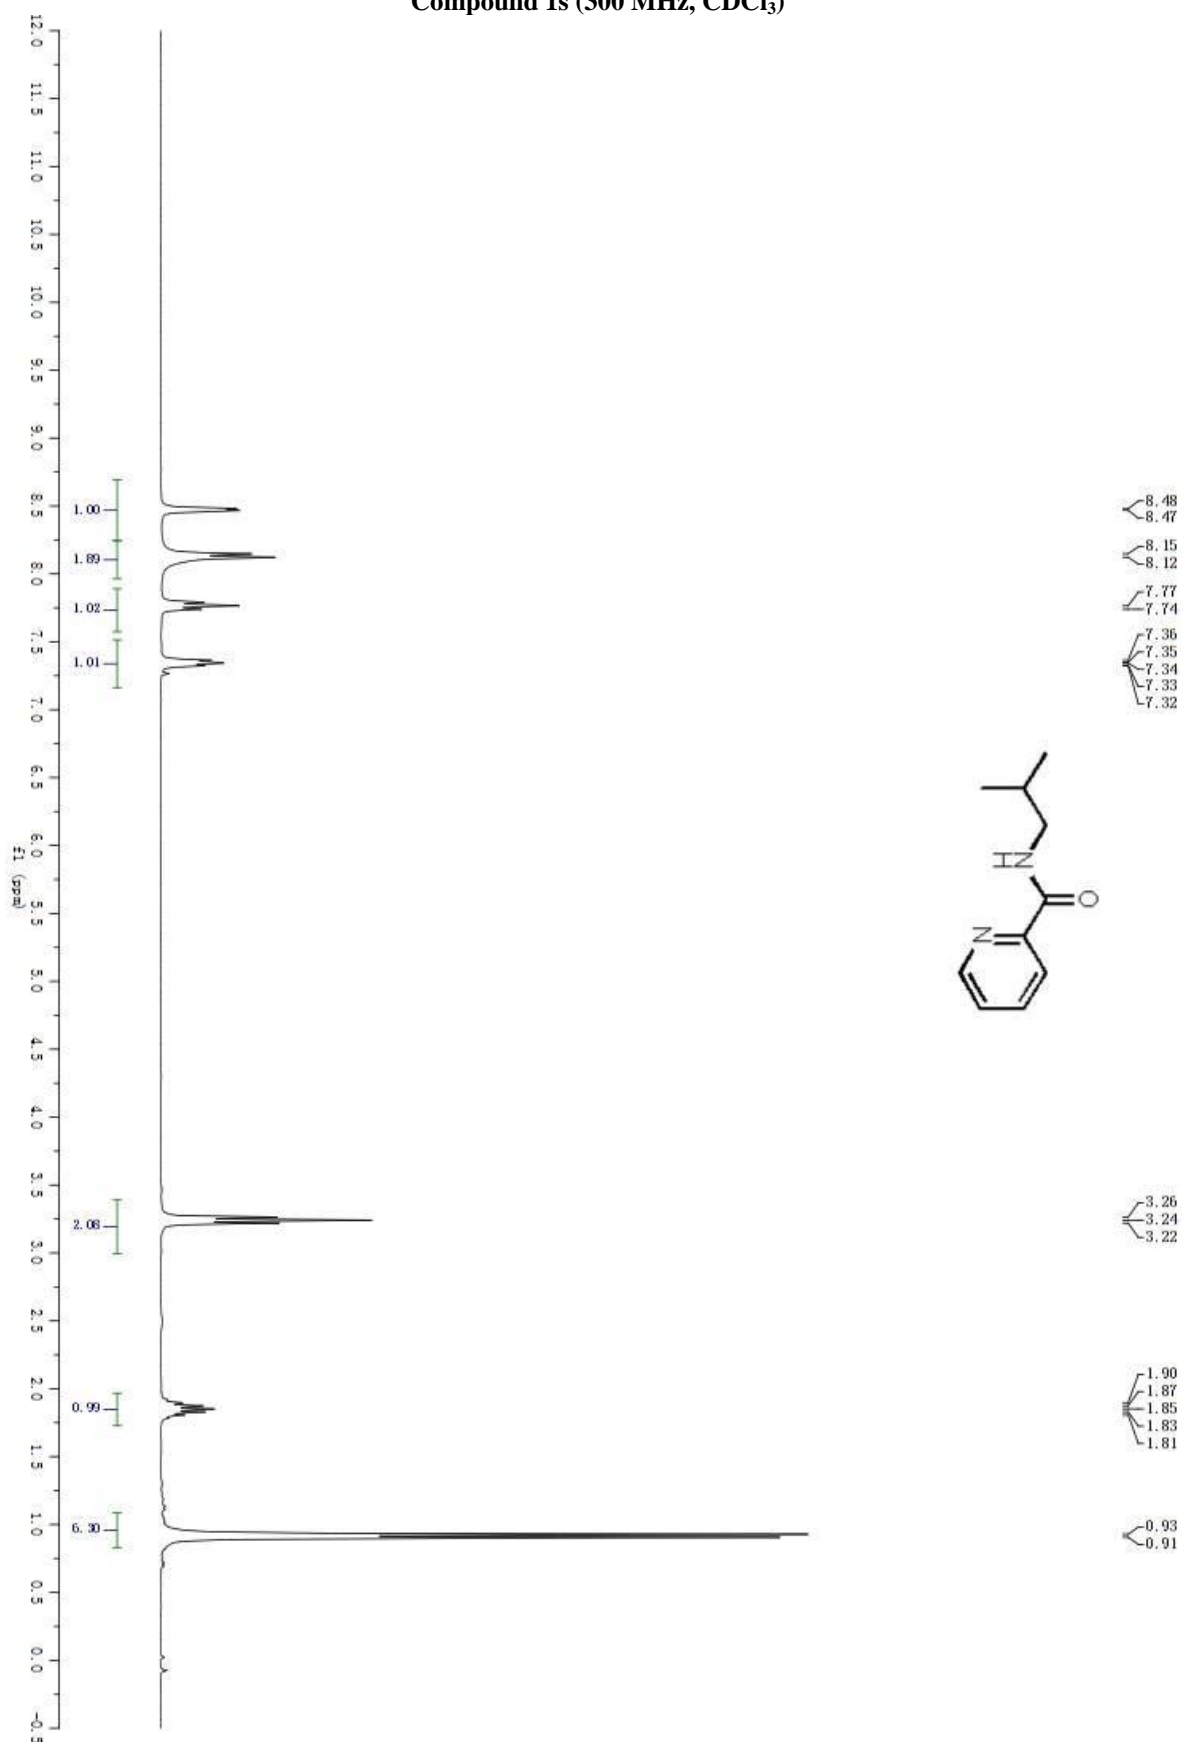

Compound 1s (75 MHz, CDCl<sub>3</sub>)

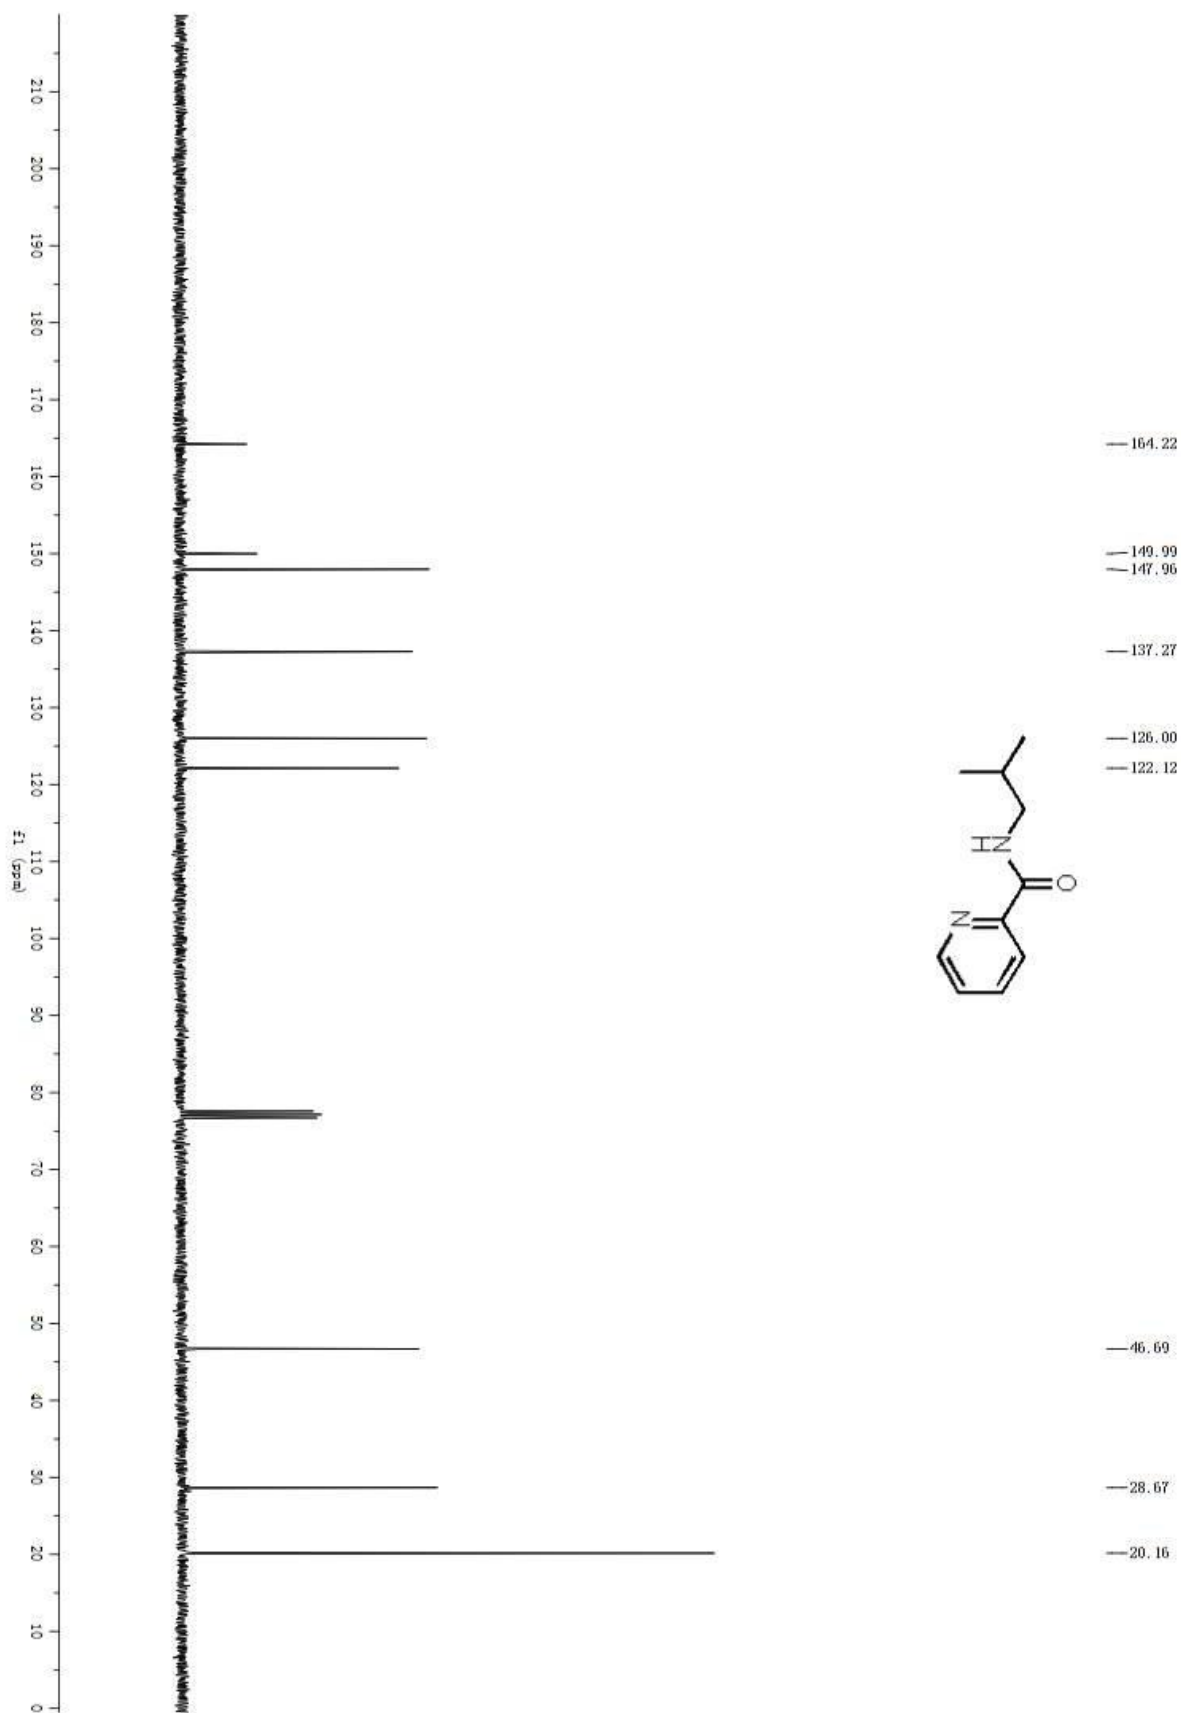

Compound 2a (300 MHz, CDCl<sub>3</sub>)

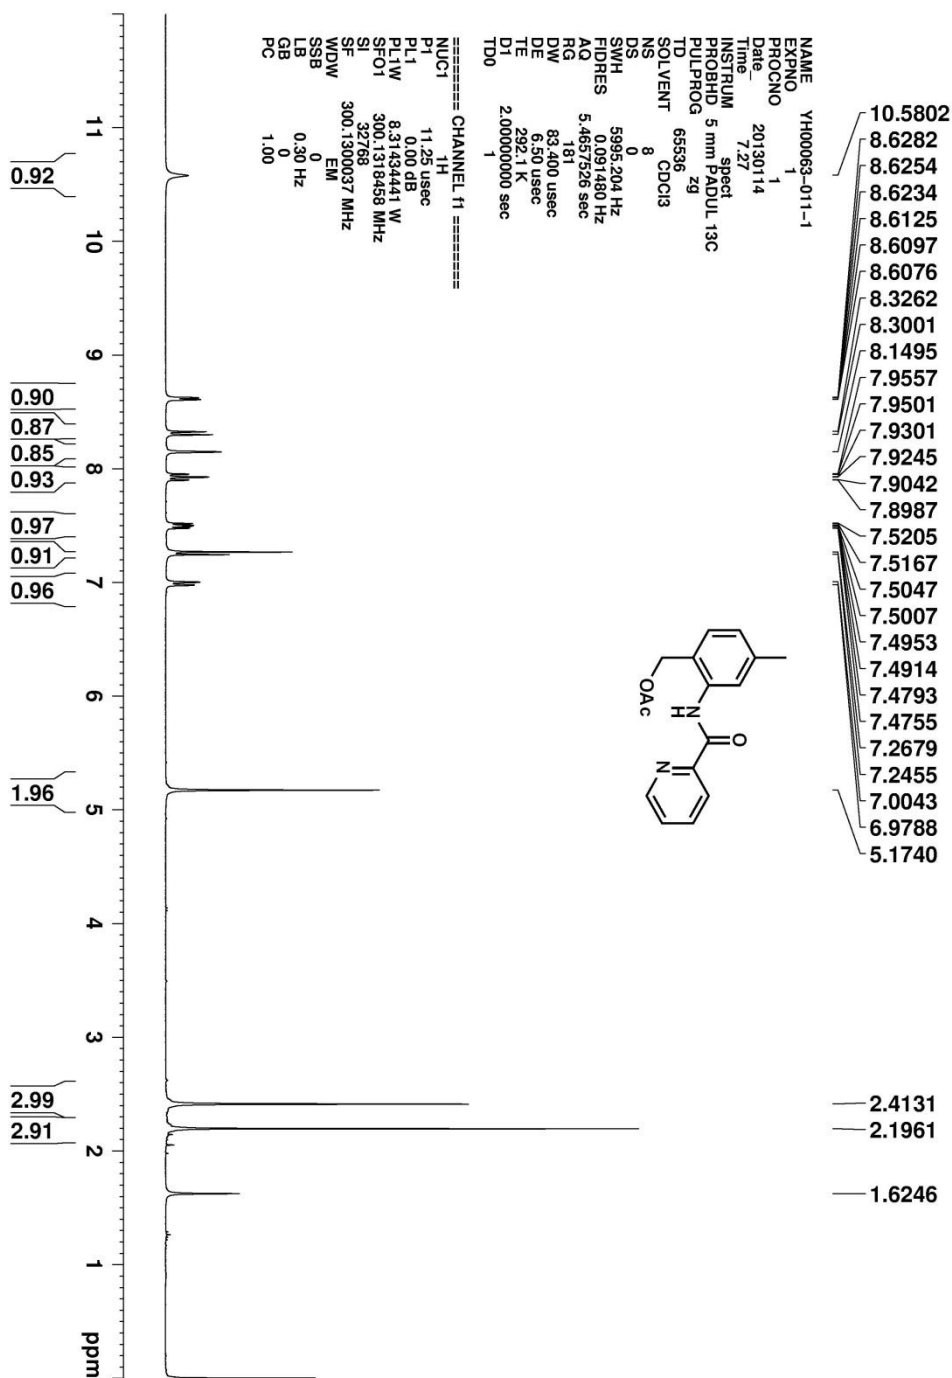

Compound 2a (75 MHz, CDCl<sub>3</sub>)

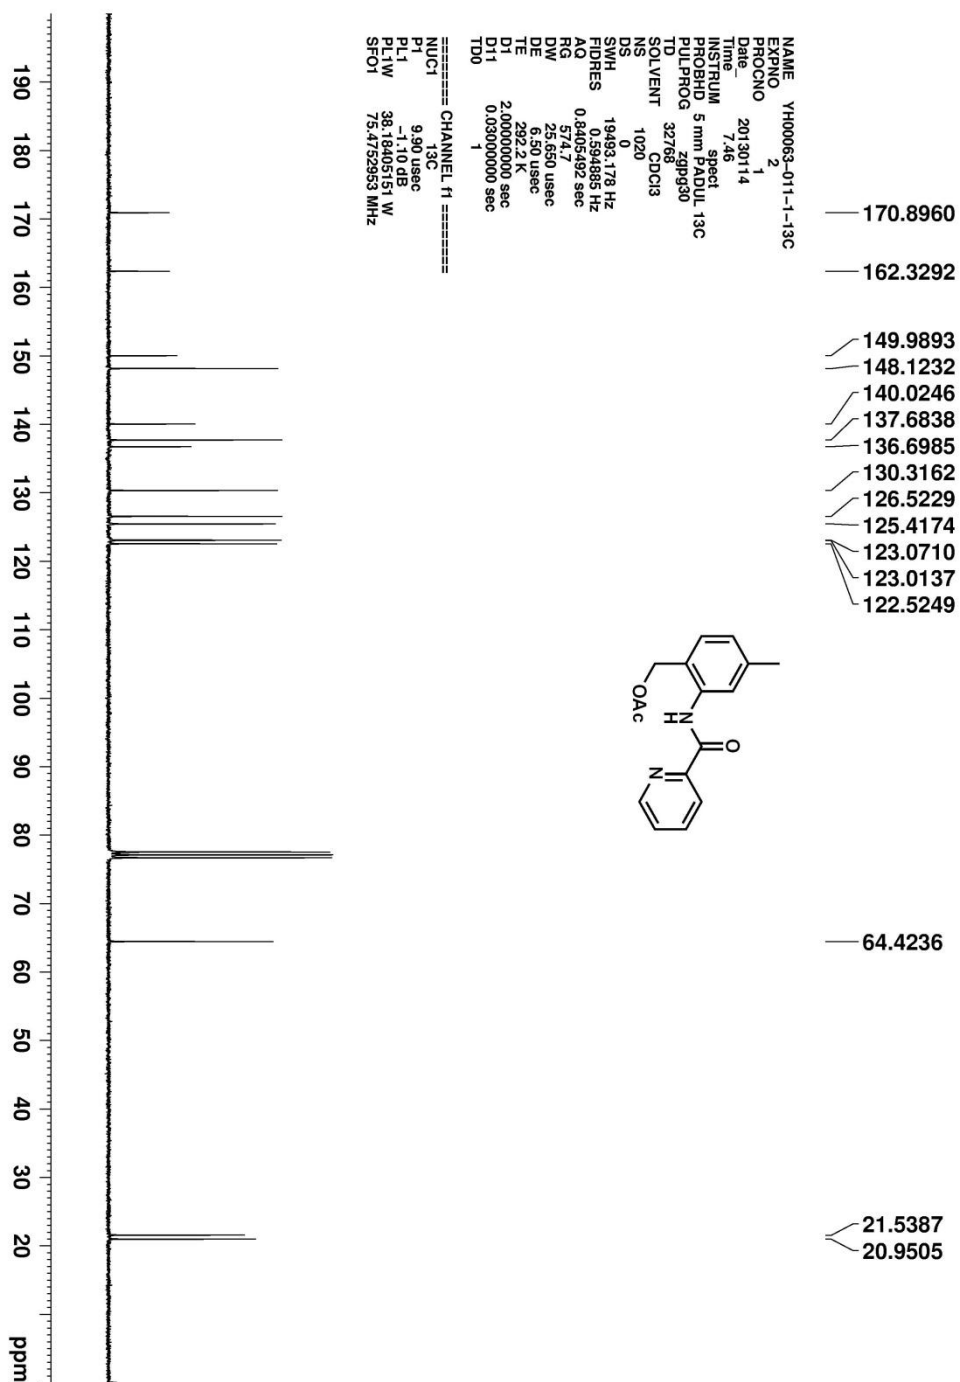

Compound 2b (500 MHz, CDCl<sub>3</sub>)

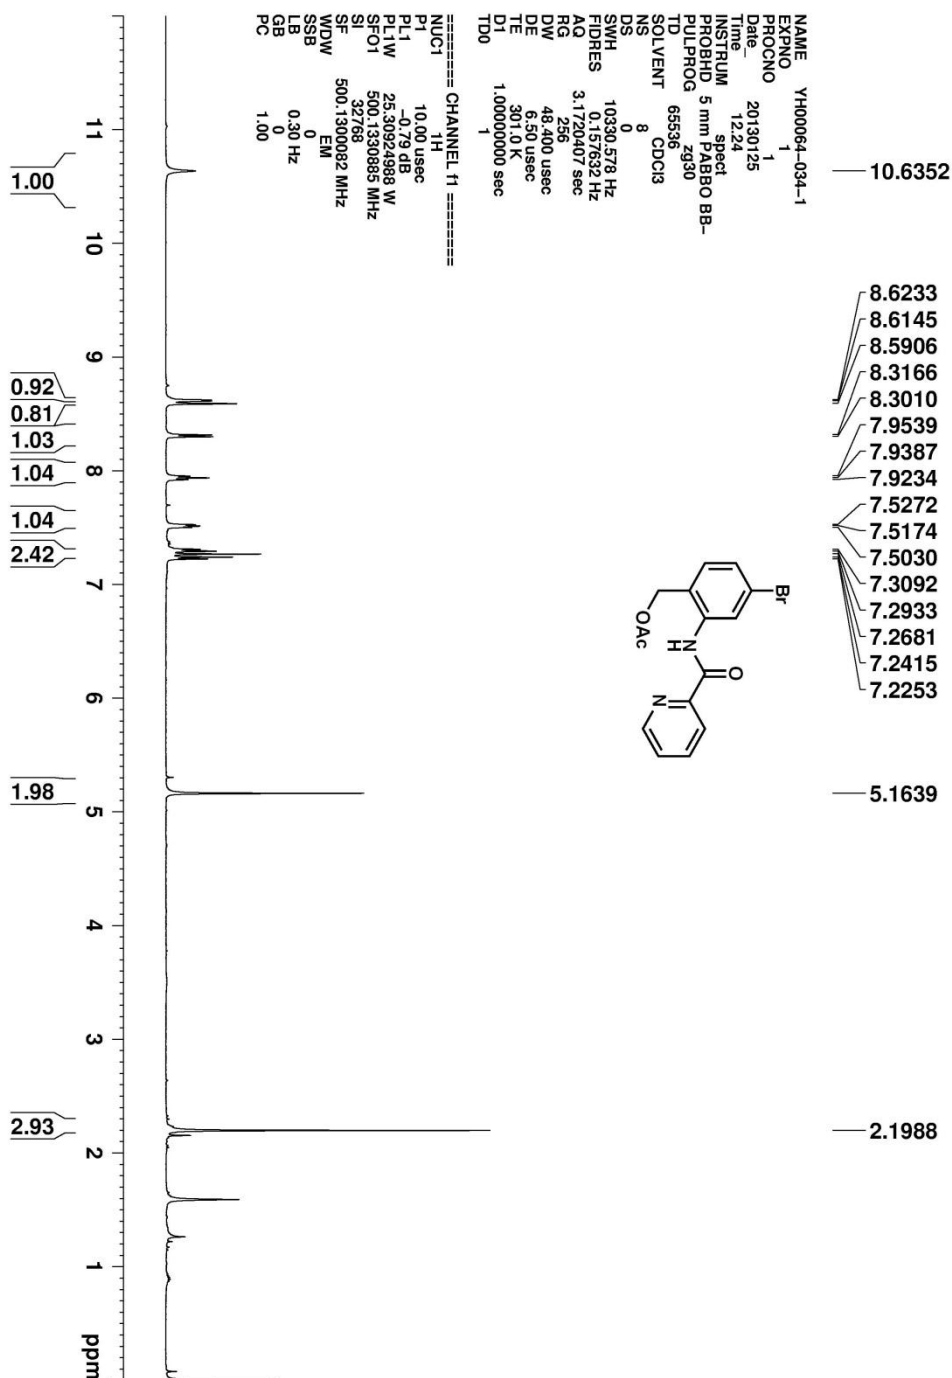

Compound 2b (125 MHz, CDCl<sub>3</sub>)

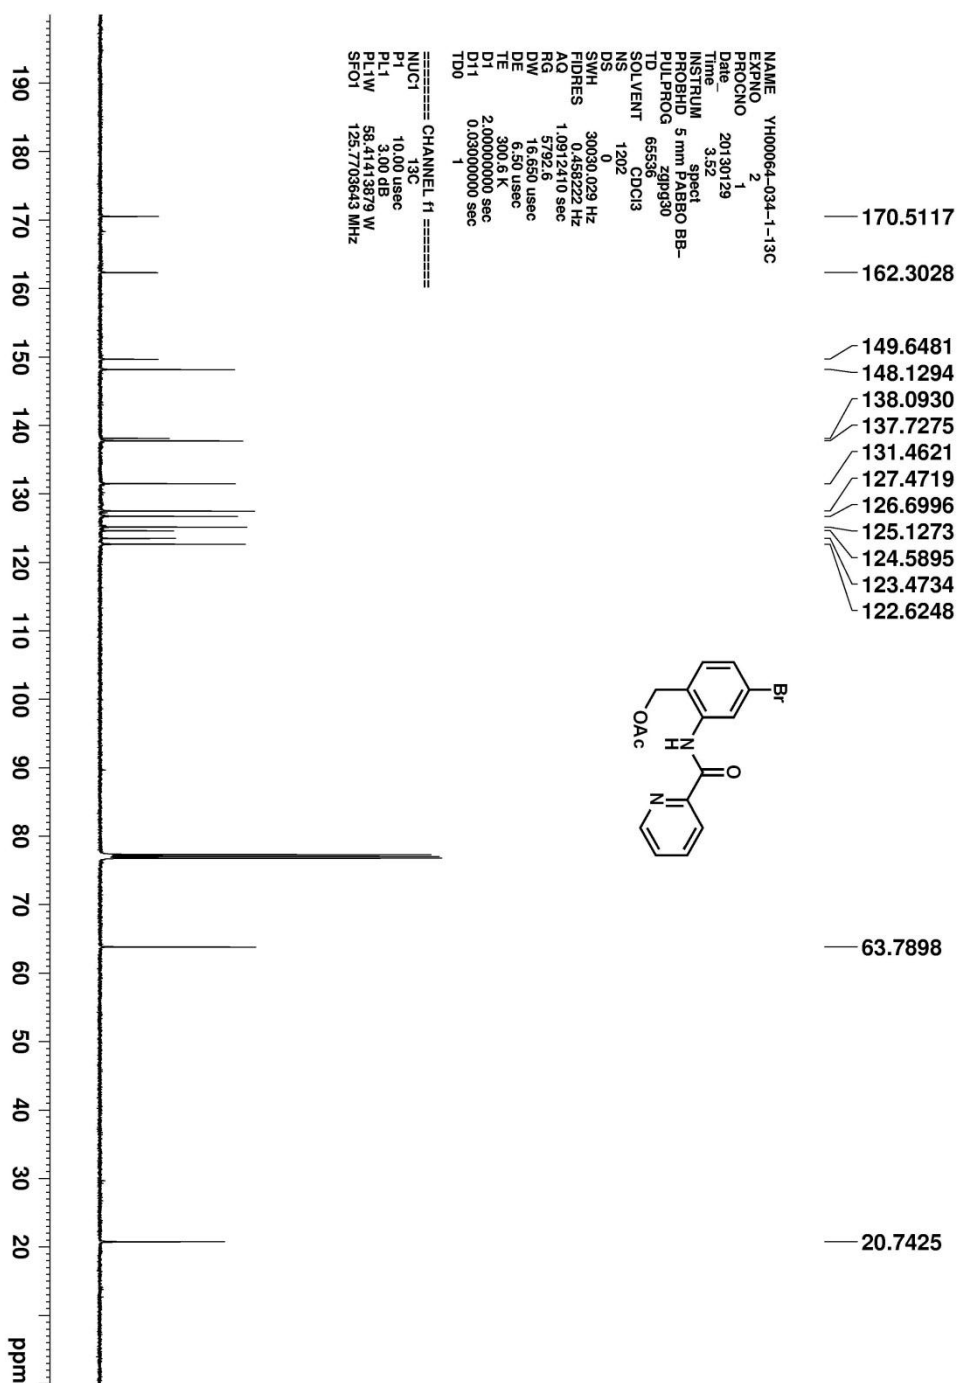



Compound 2c (400 MHz, CDCl<sub>3</sub>)

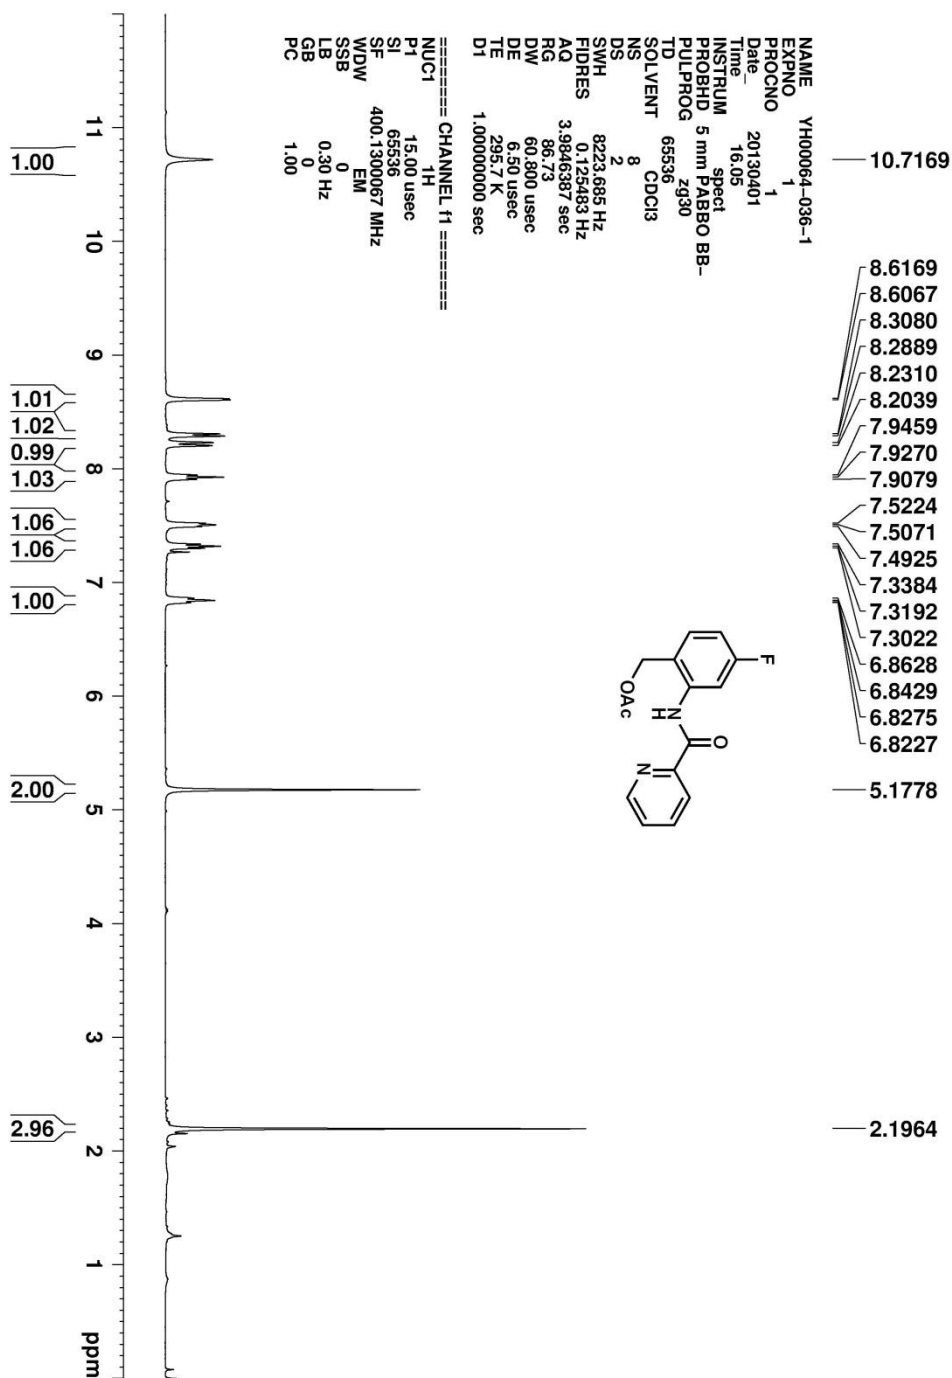

Compound 2c (100MHz, CDCl<sub>3</sub>)

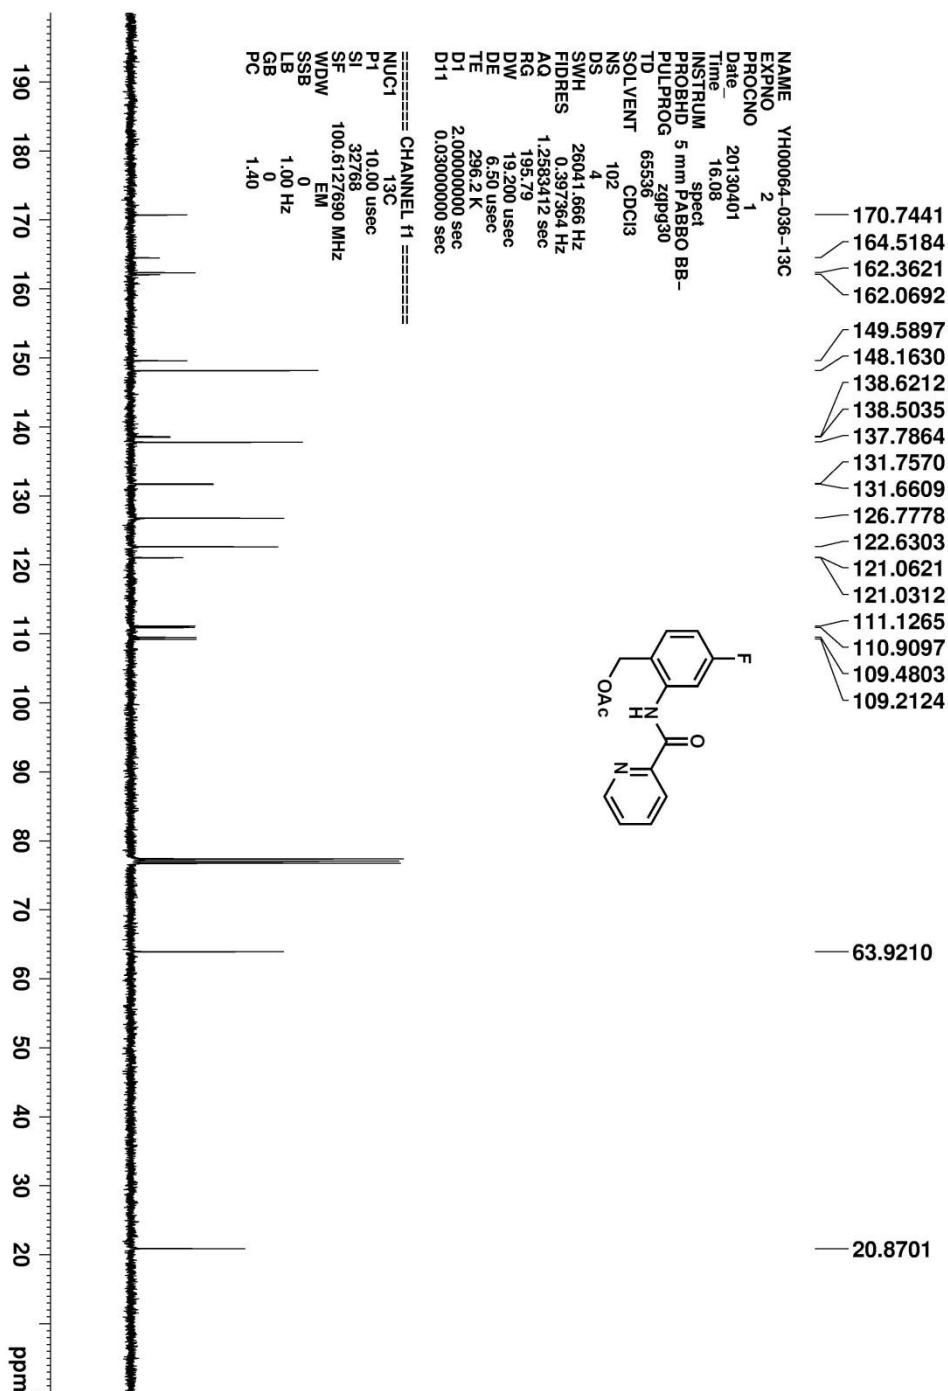

Compound 2d (400MHz, CDCl<sub>3</sub>)

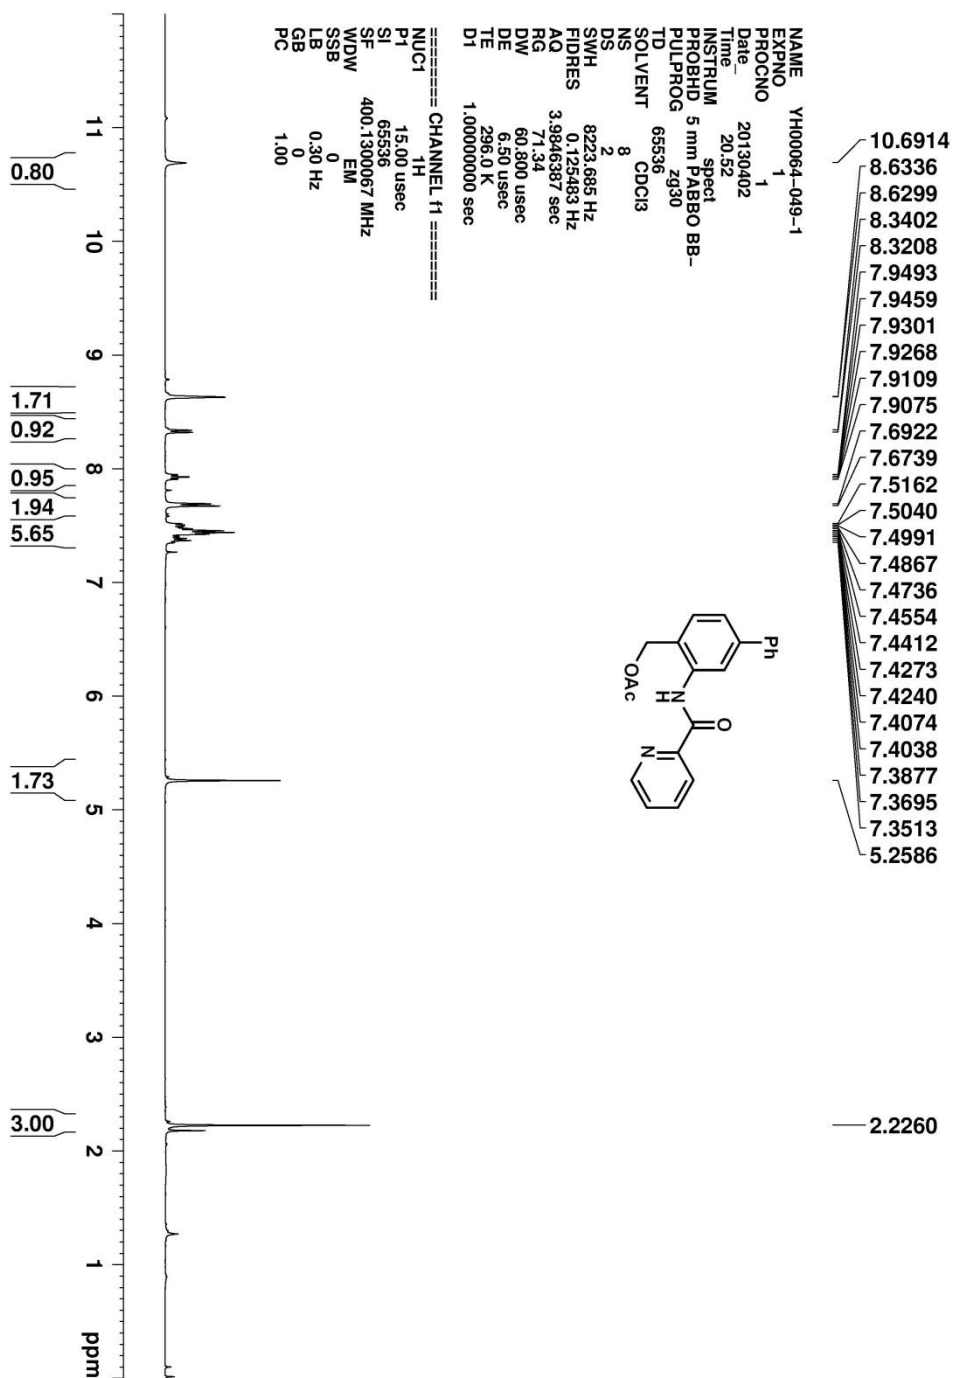

Compound 2d (100 MHz, CDCl<sub>3</sub>)

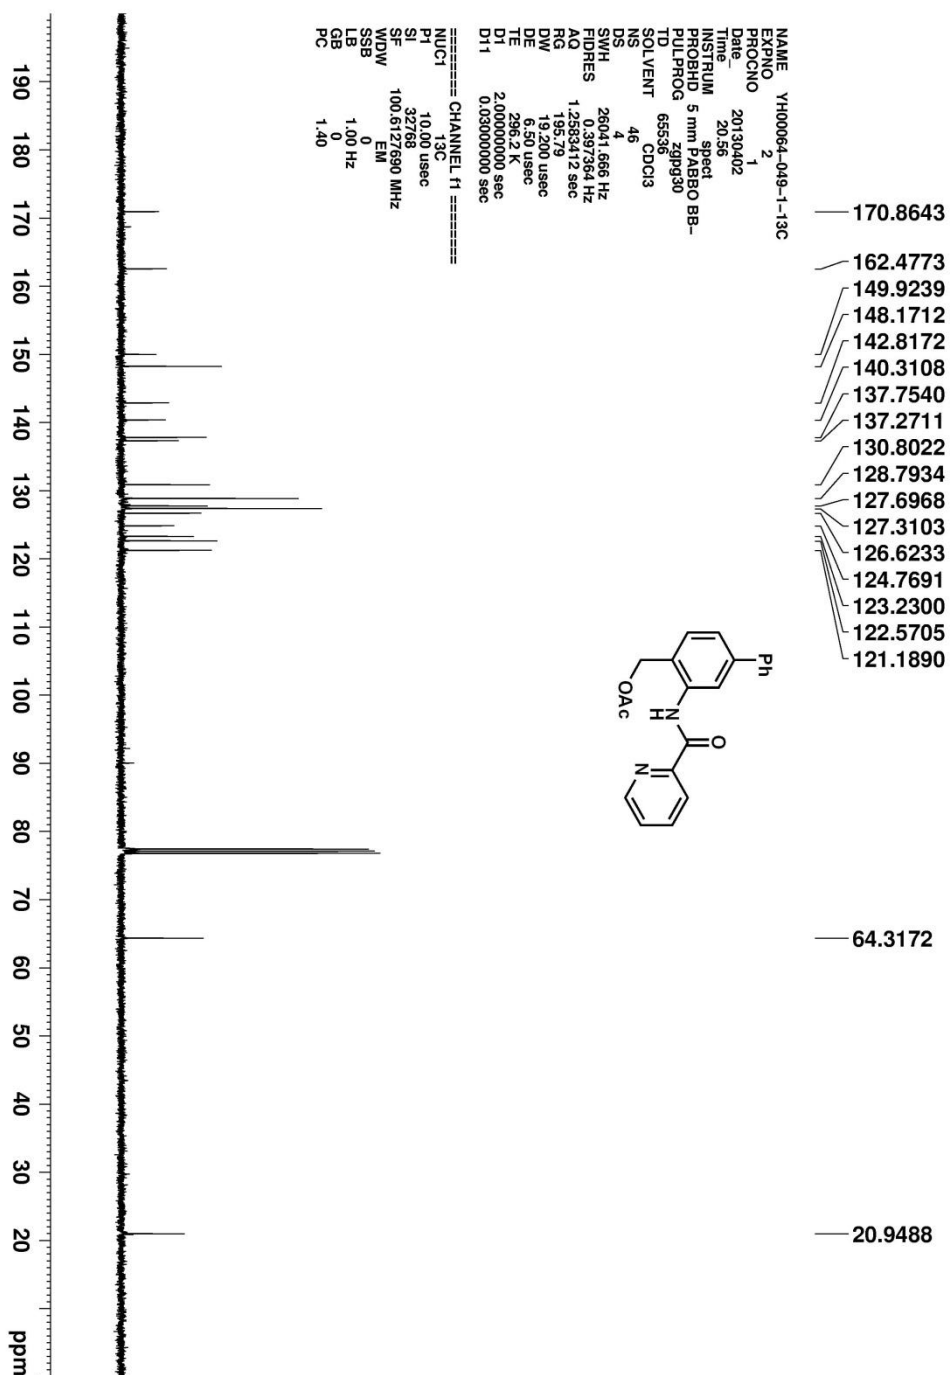

Compound 2e (400 MHz, CDCl<sub>3</sub>)

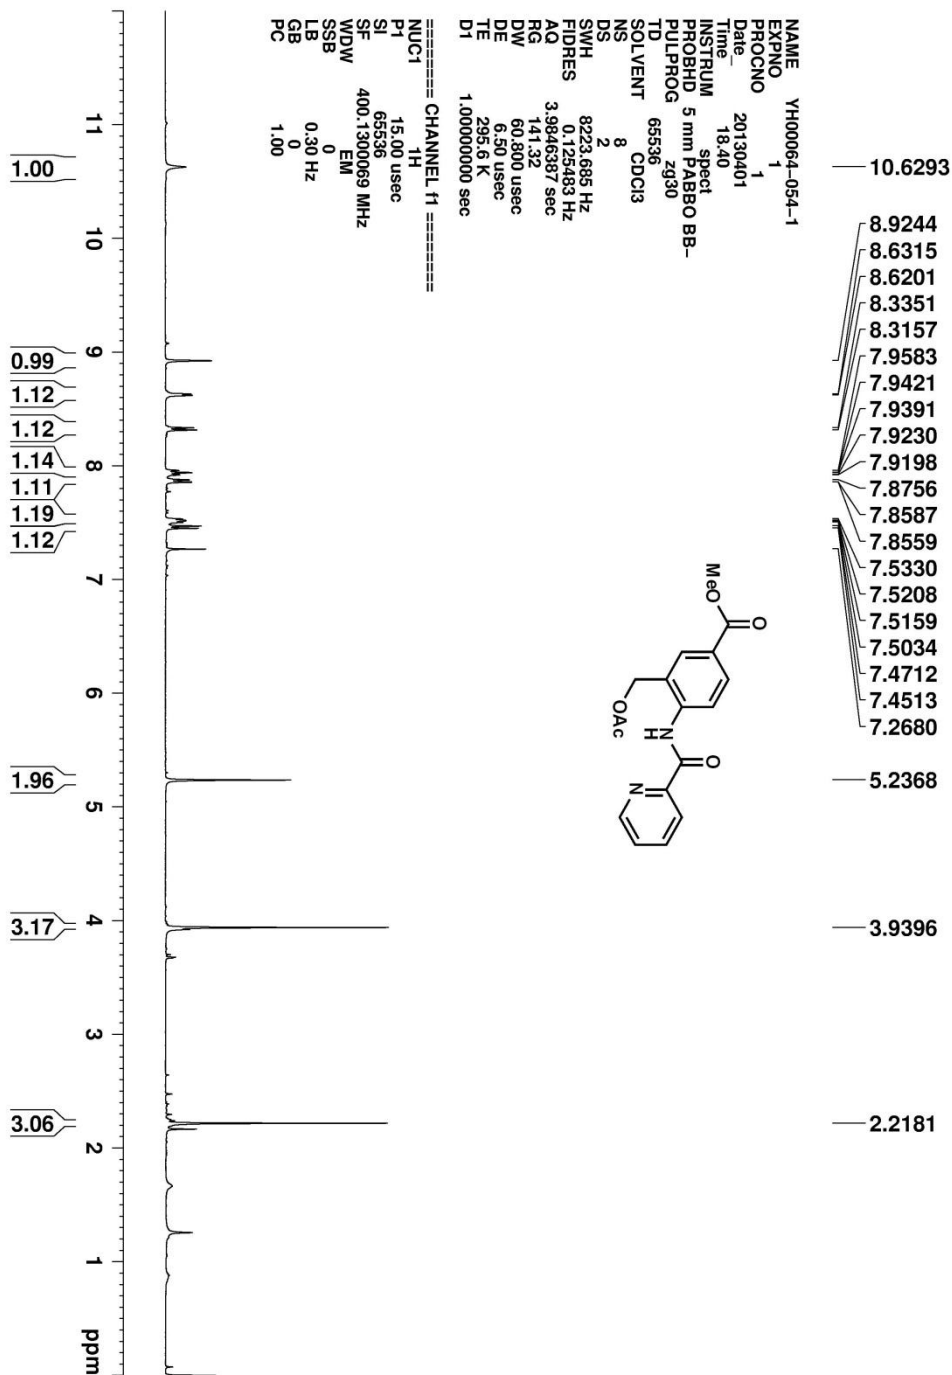

Compound 2e (125 MHz, CDCl<sub>3</sub>)

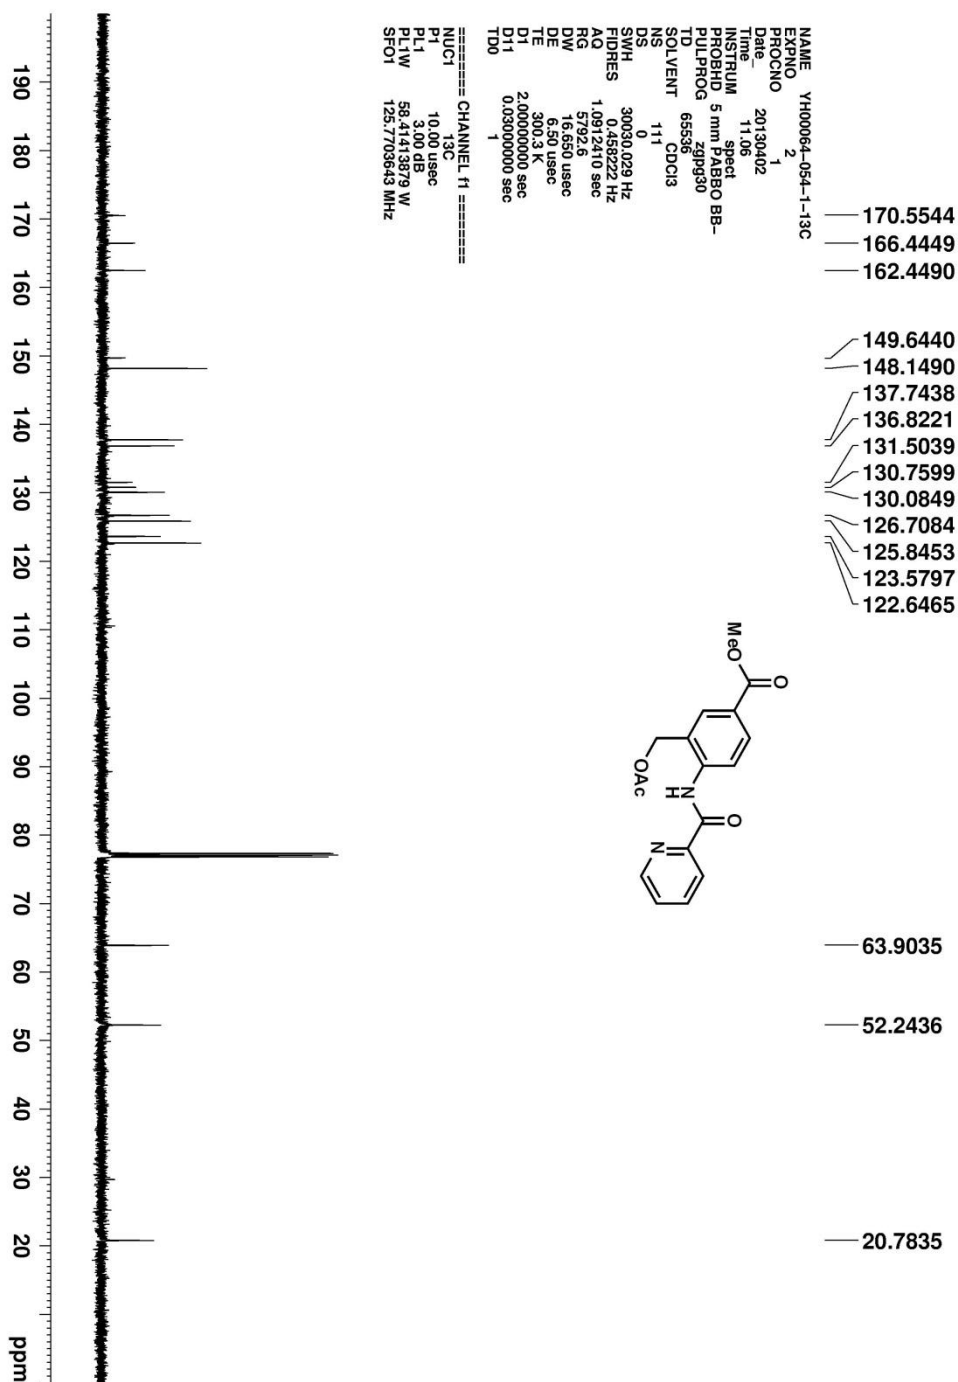

Compound 2f (300 MHz, CDCl<sub>3</sub>)

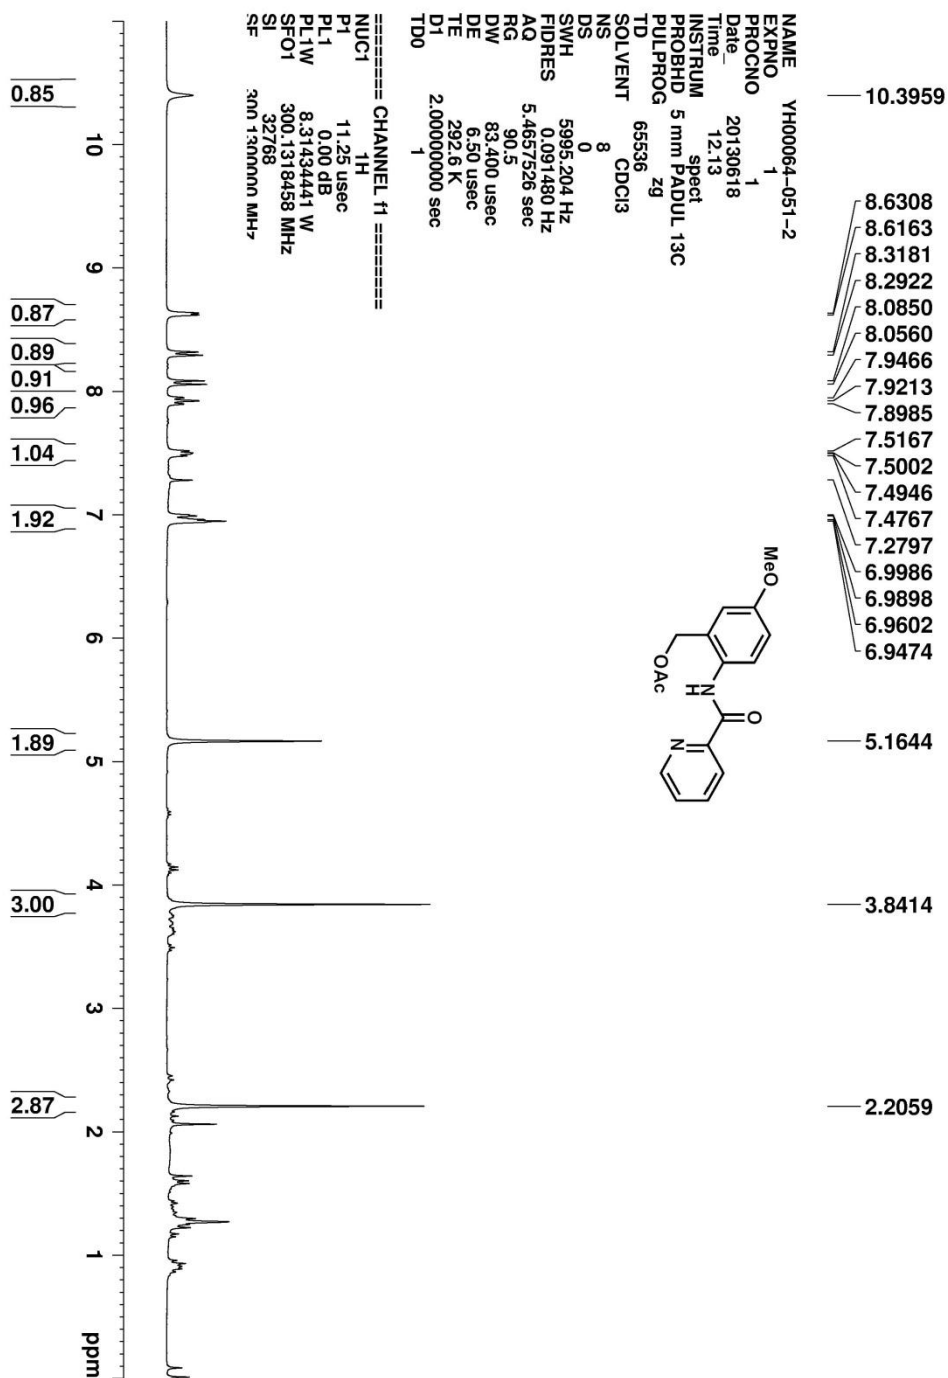

Compound 2f (75 MHz, CDCl<sub>3</sub>)

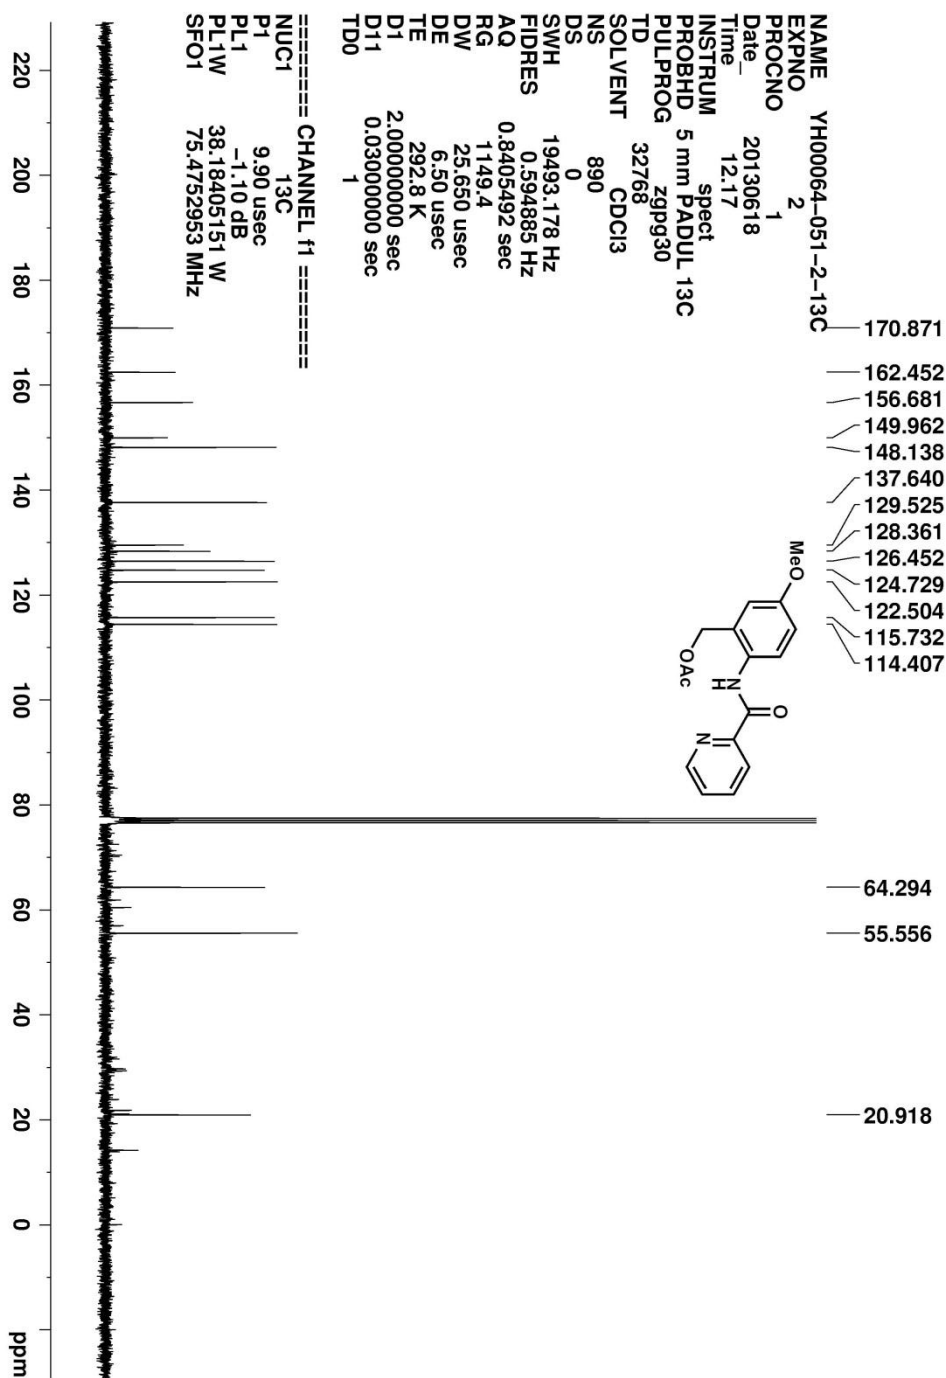



Compound 2g (400 MHz, CDCl<sub>3</sub>)

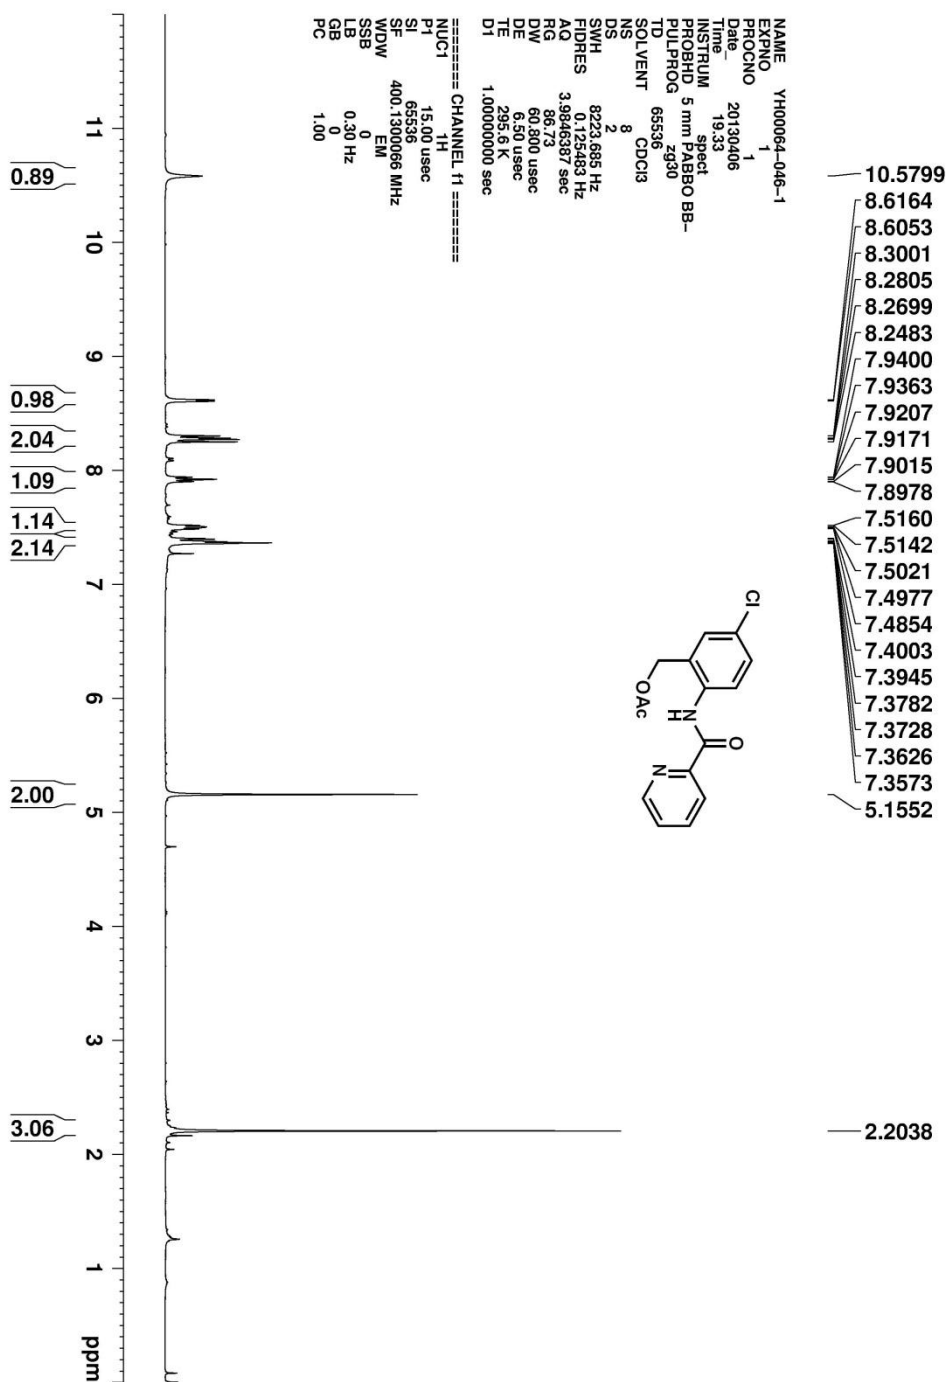

Compound 2g (100MHz, CDCl<sub>3</sub>)

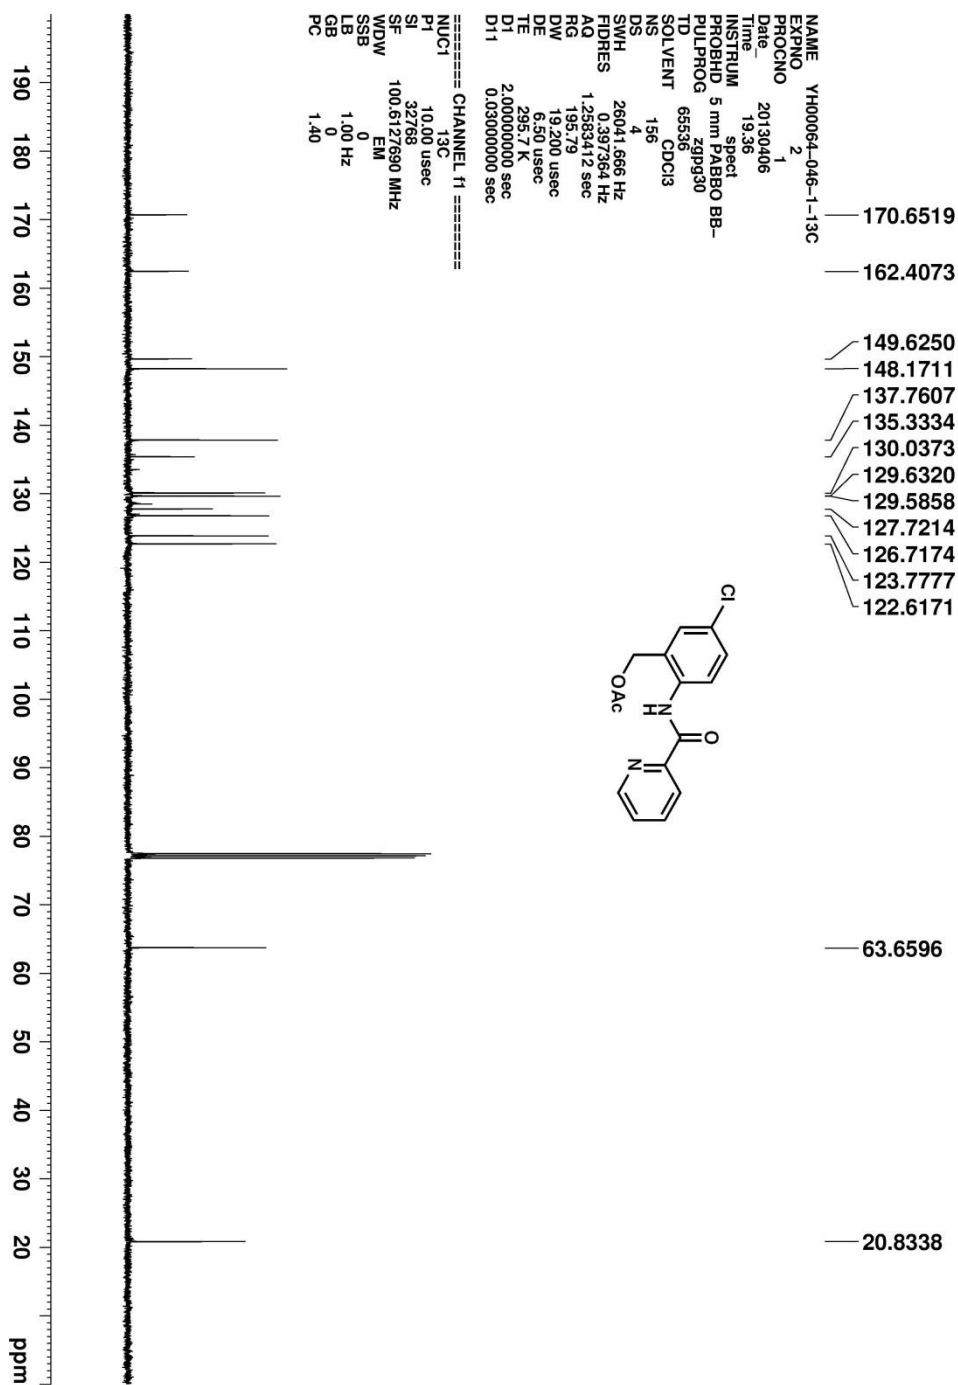

Compound 2h (400 MHz, CDCl<sub>3</sub>)

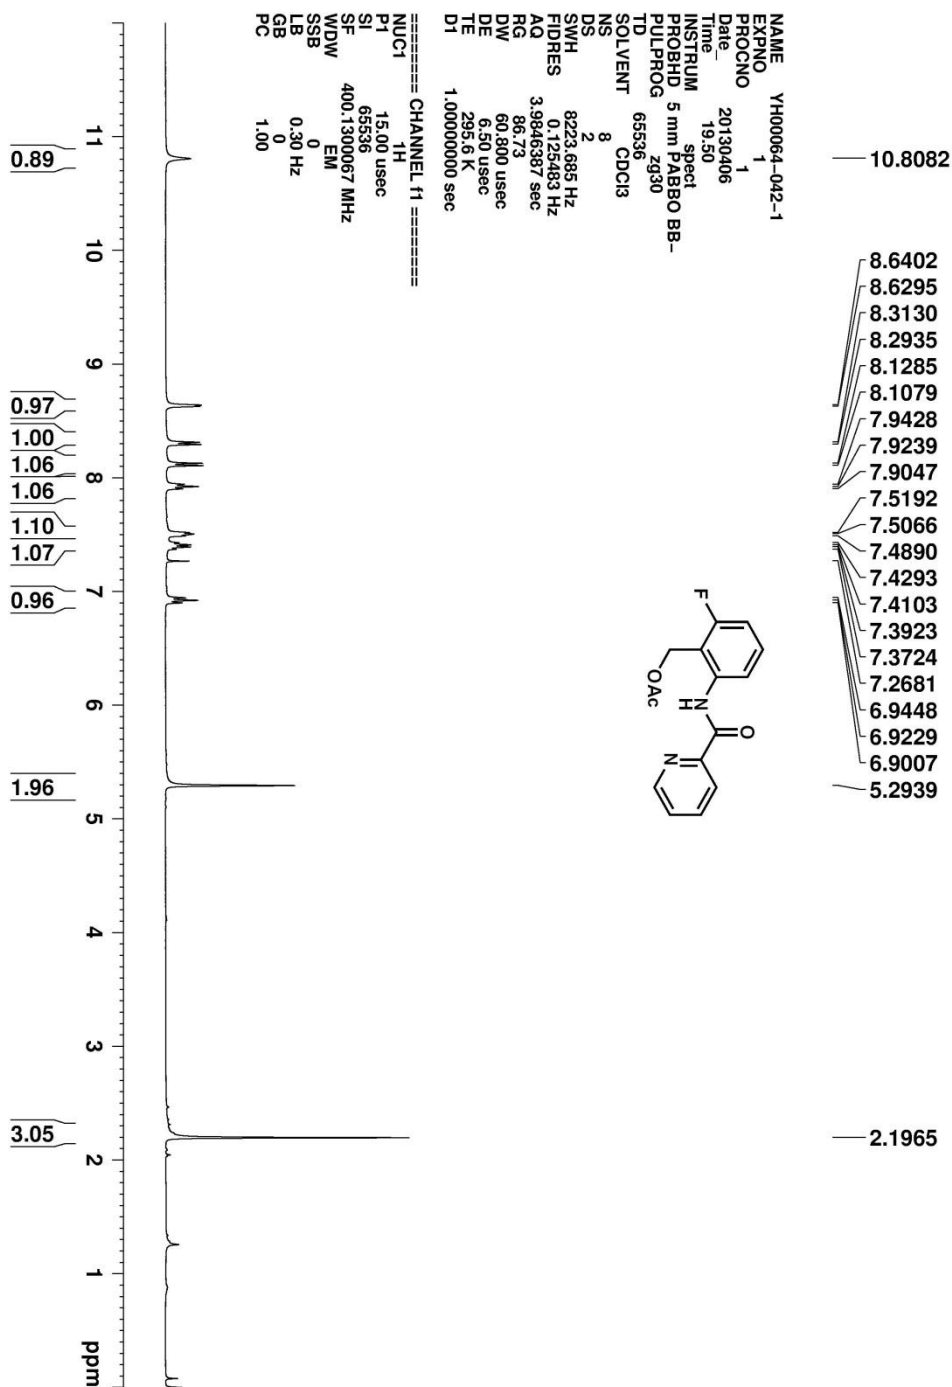

Compound 2h (100 MHz, CDCl<sub>3</sub>)

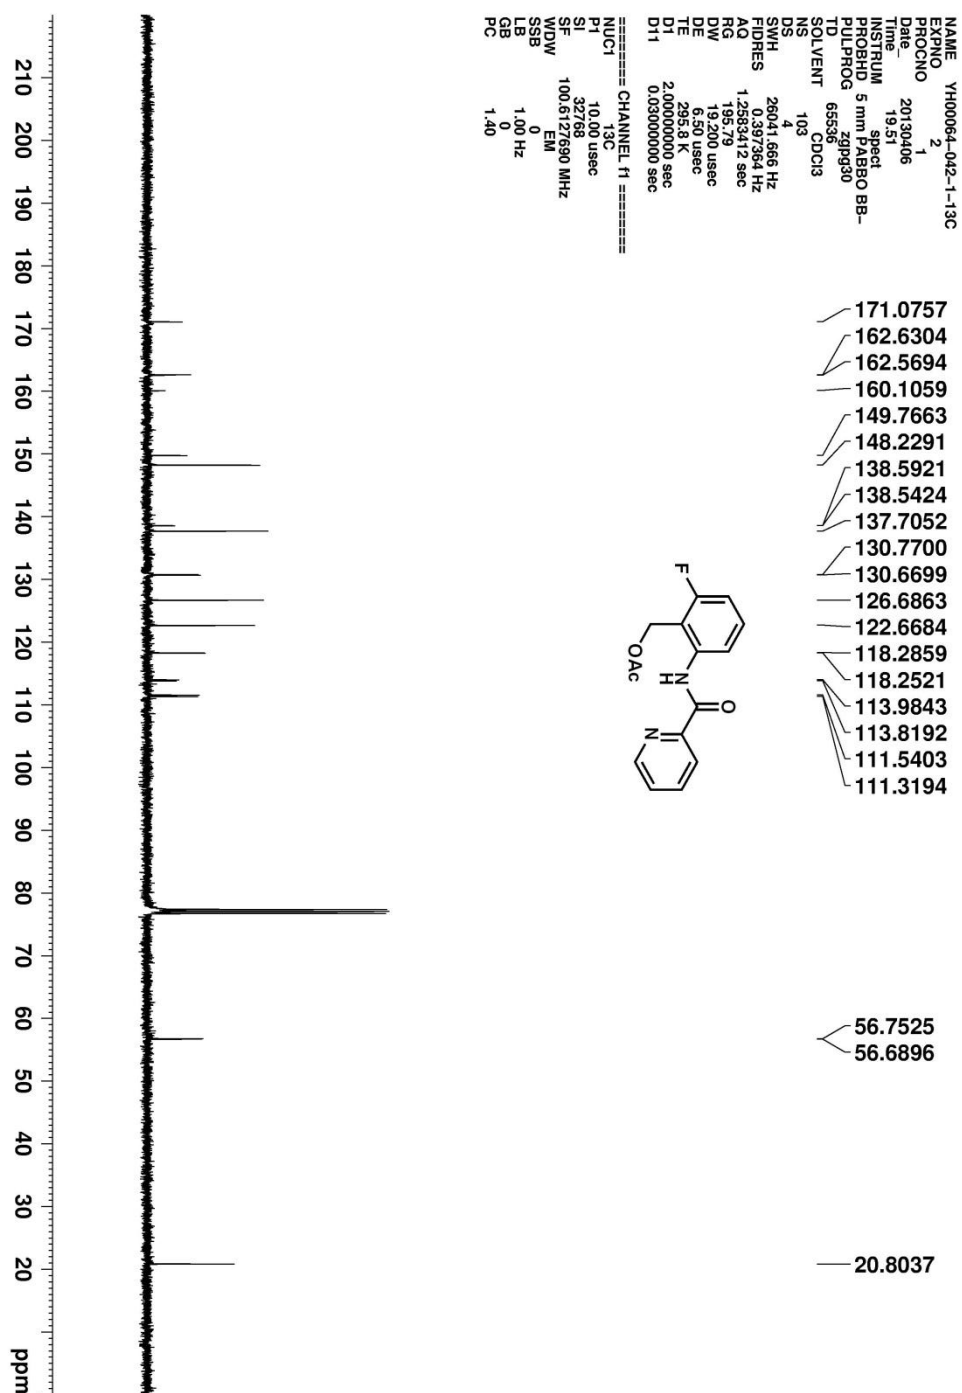

Compound 2i (400 MHz, CDCl<sub>3</sub>)

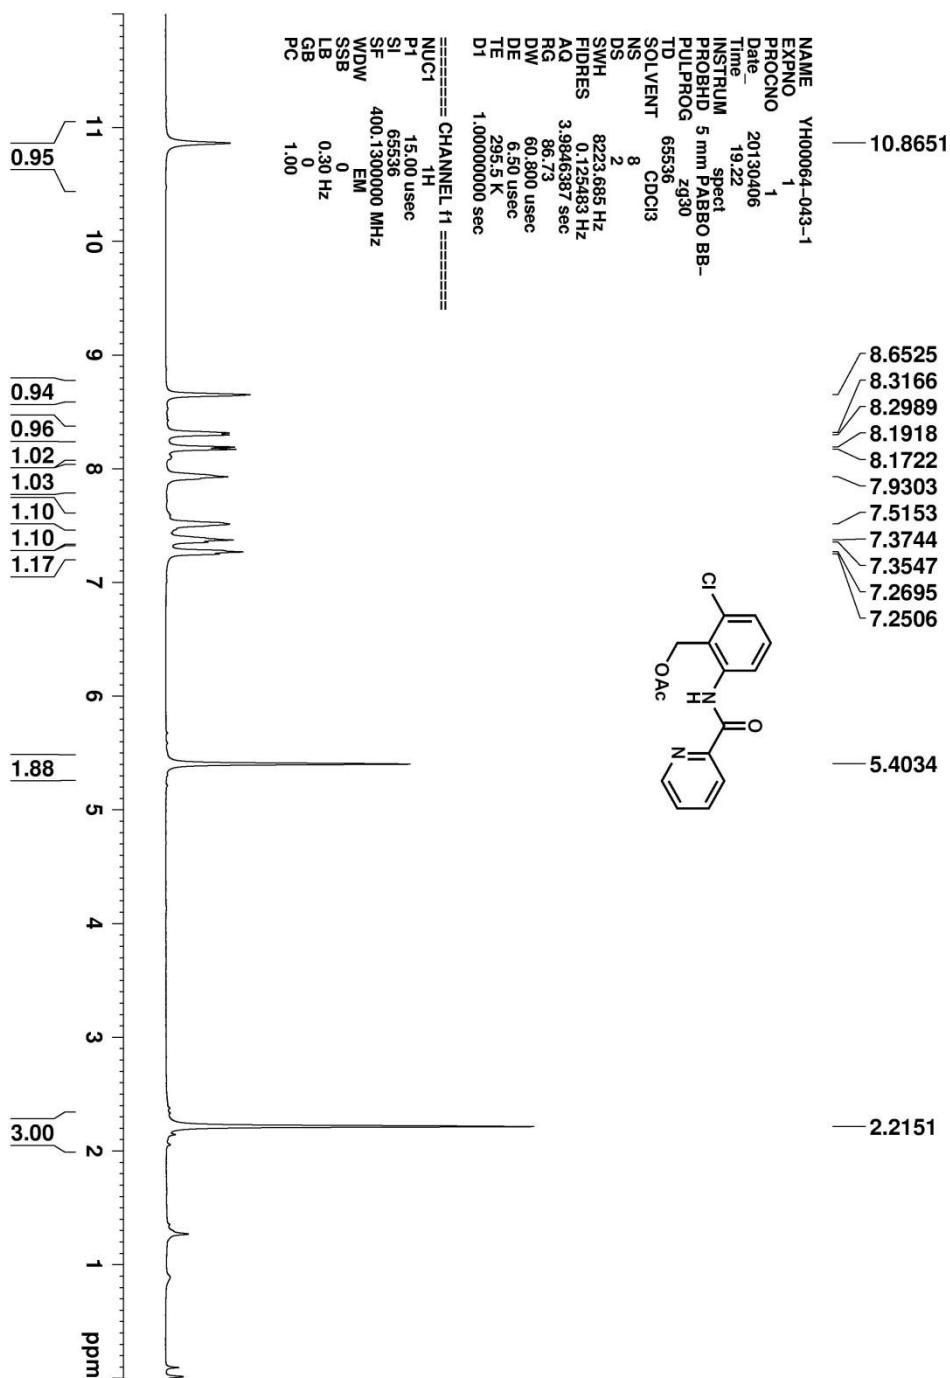

Compound 2i (100 MHz, CDCl<sub>3</sub>)

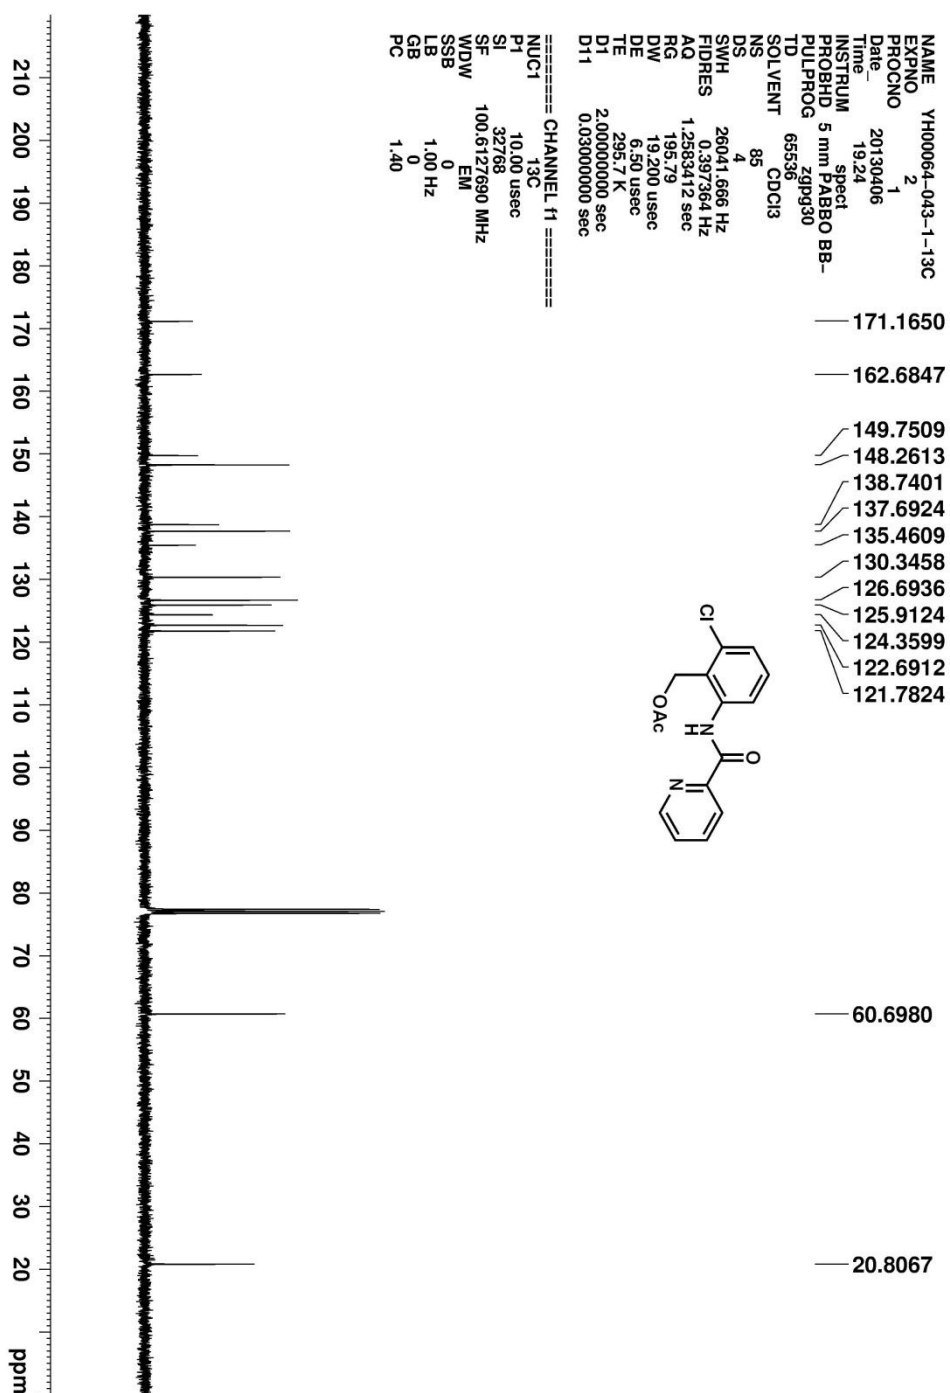

Compound 2j (500 MHz, CDCl<sub>3</sub>)

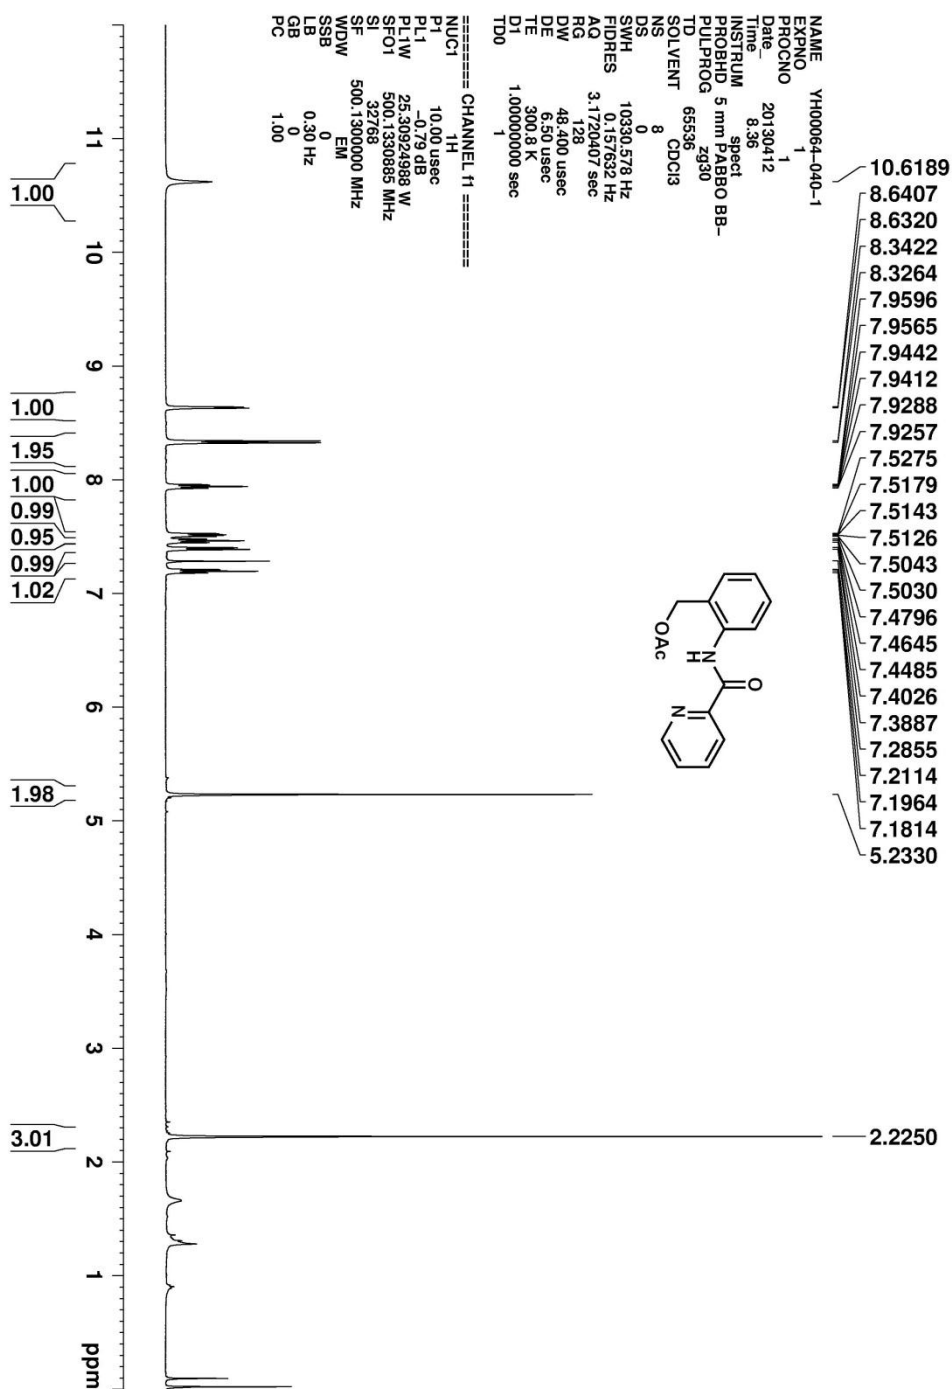

Compound 2j (125 MHz, CDCl<sub>3</sub>)

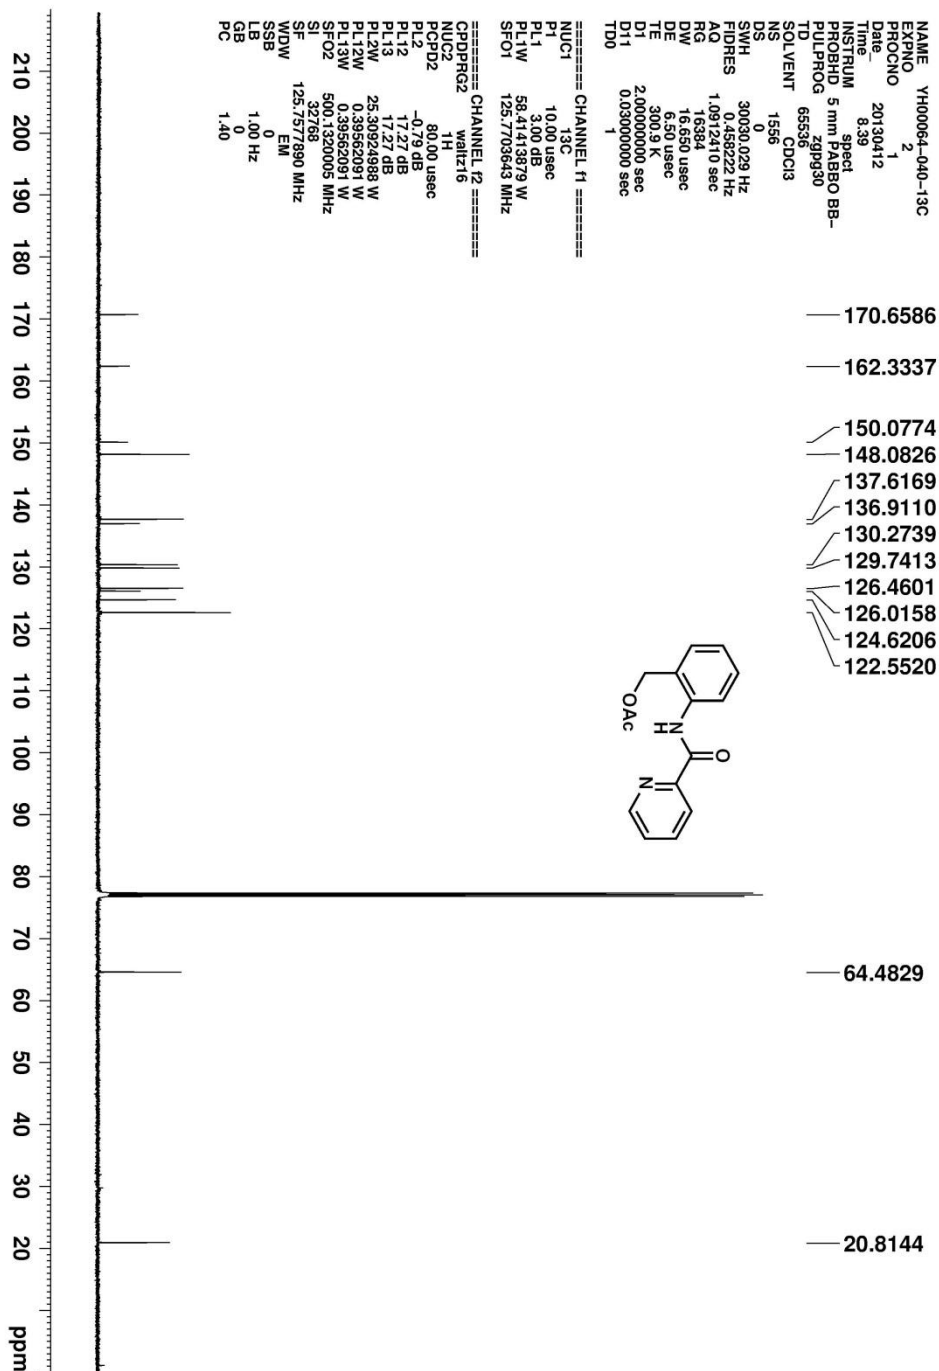



Compound 2k (500 MHz, CDCl<sub>3</sub>)

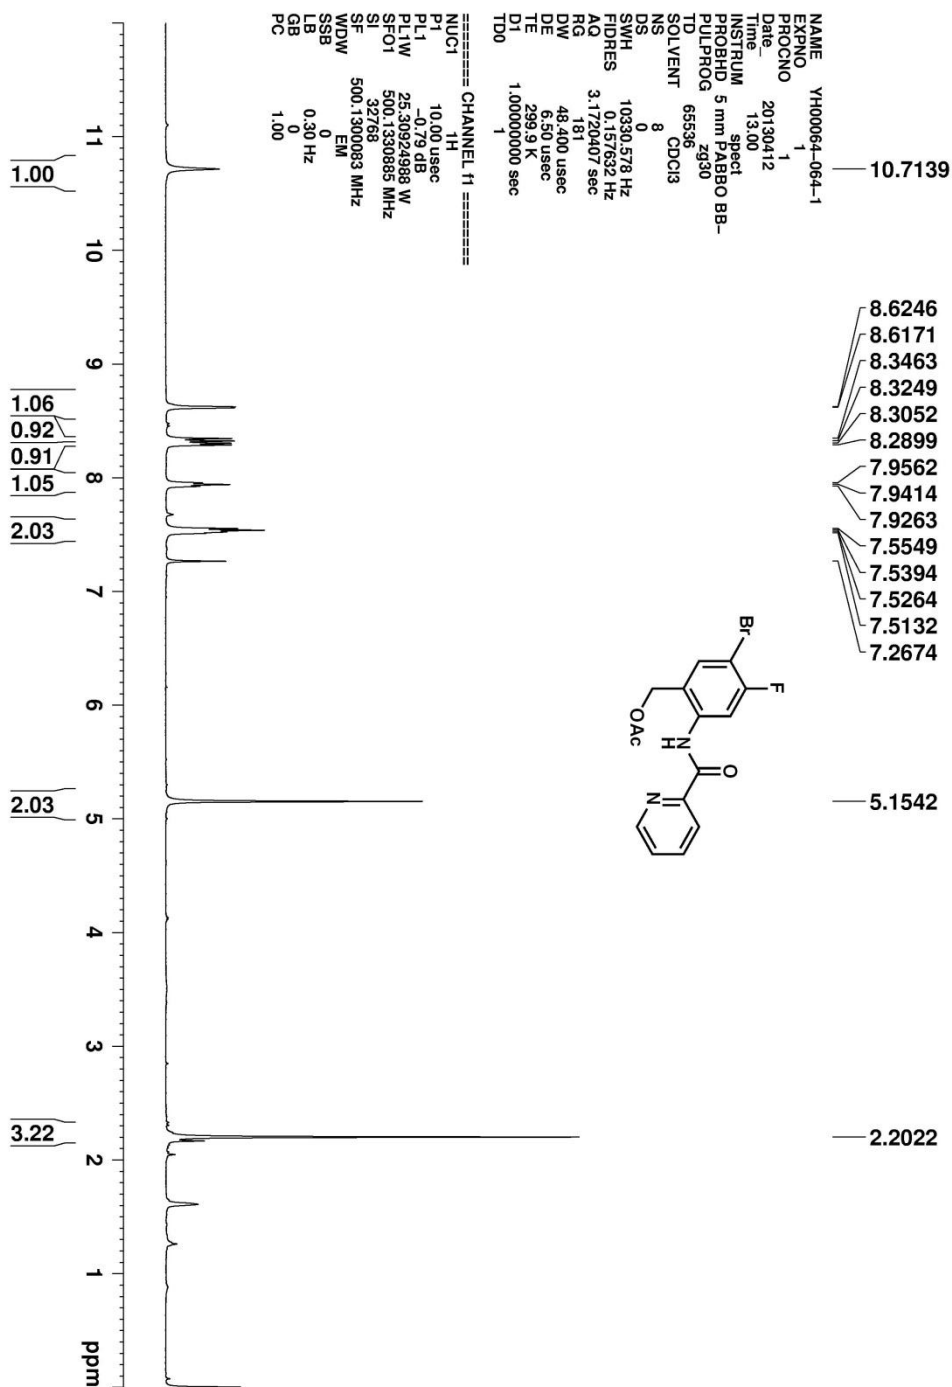

Compound 2k (100MHz, CDCl<sub>3</sub>)

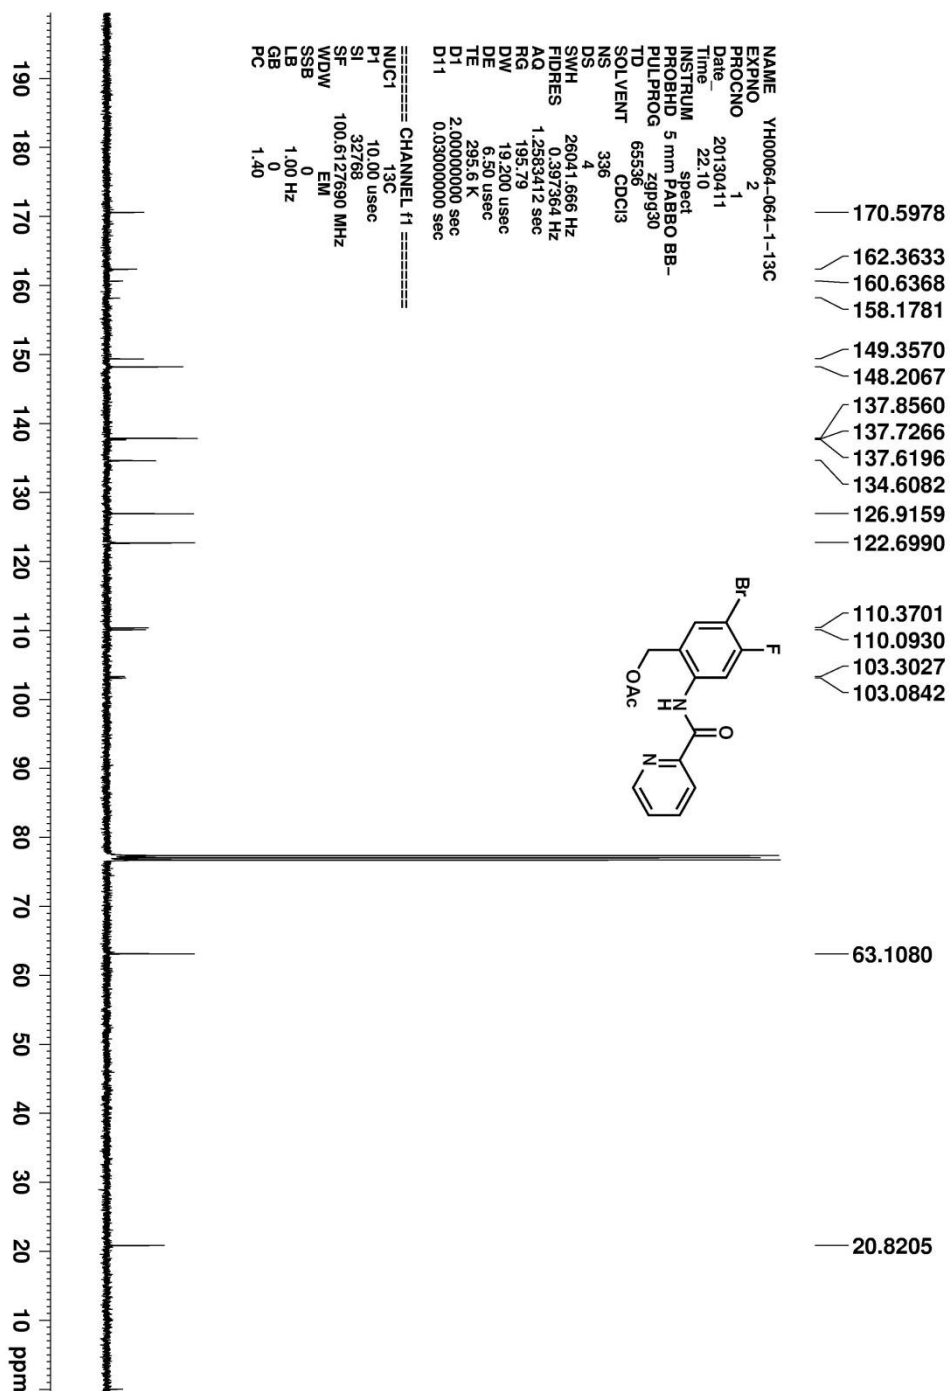

Compound 2l (400 MHz, CDCl<sub>3</sub>)

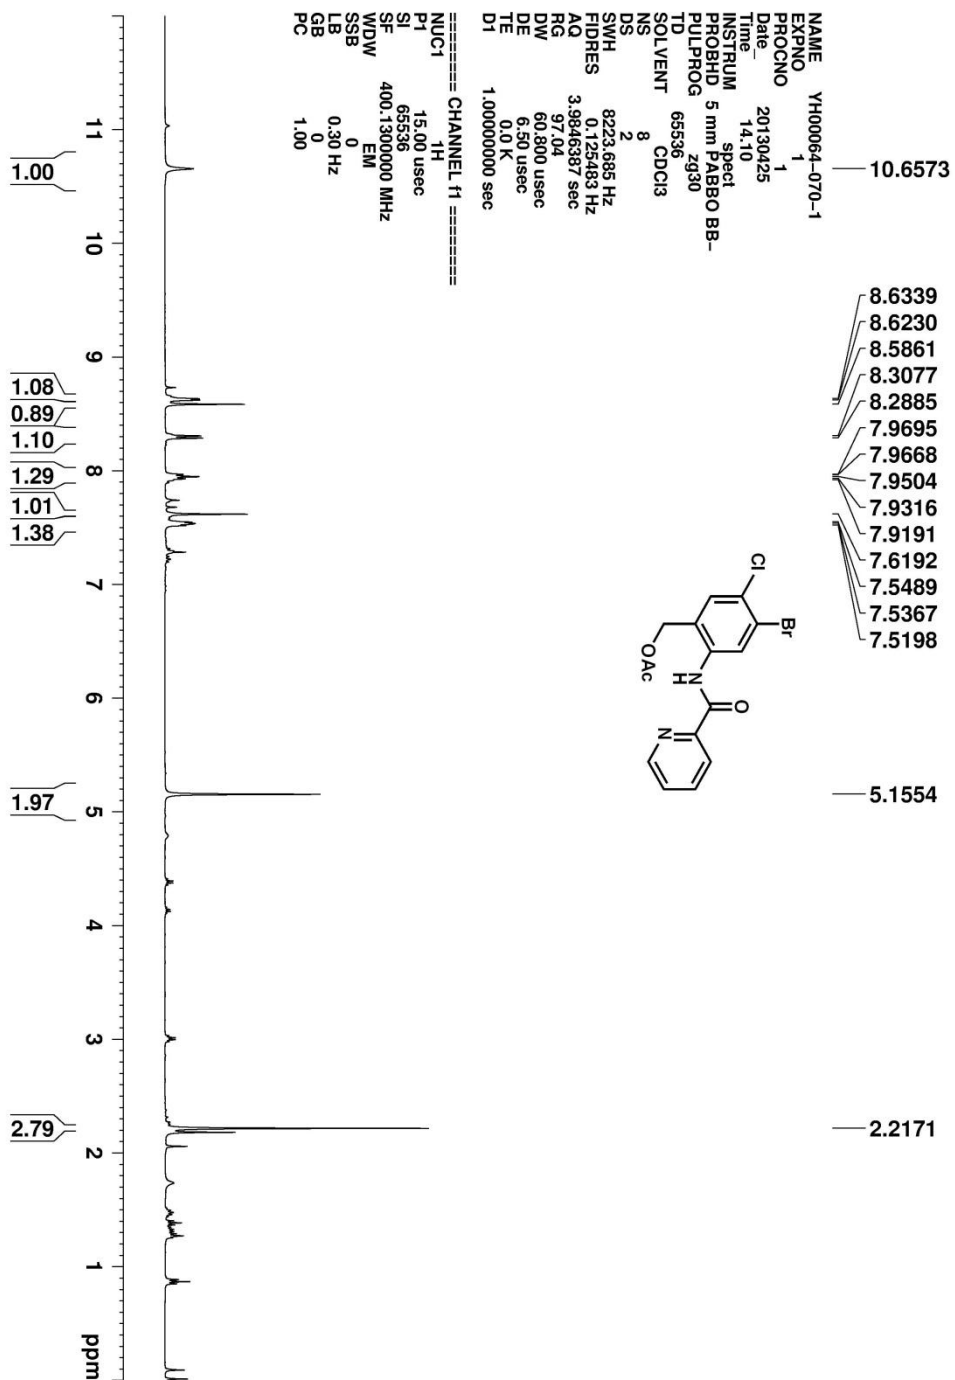

Compound 2l (100 MHz, CDCl<sub>3</sub>)

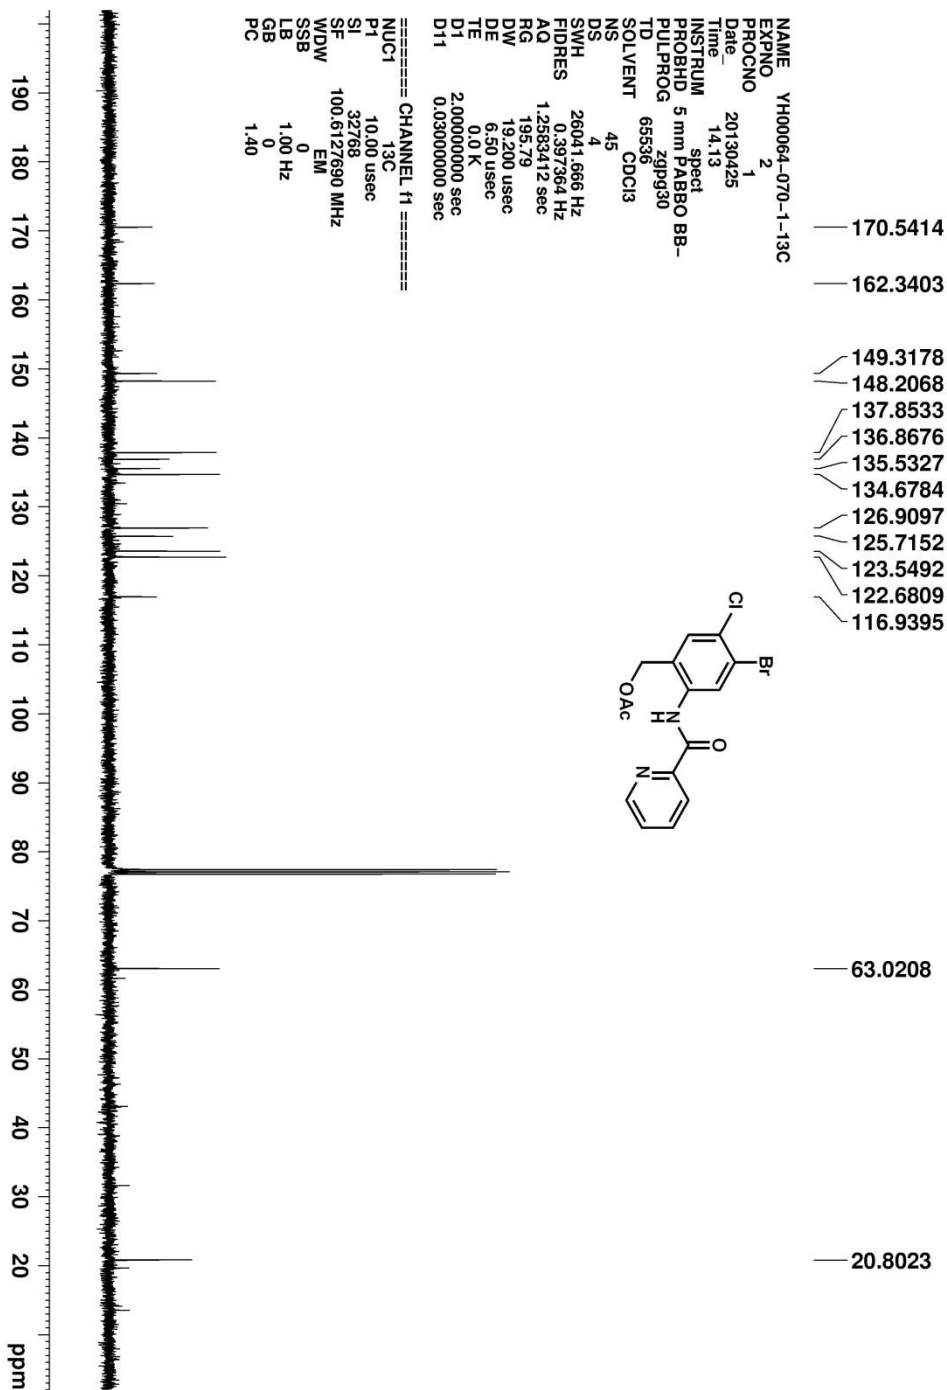

Compound 2m (500MHz, CDCl<sub>3</sub>)

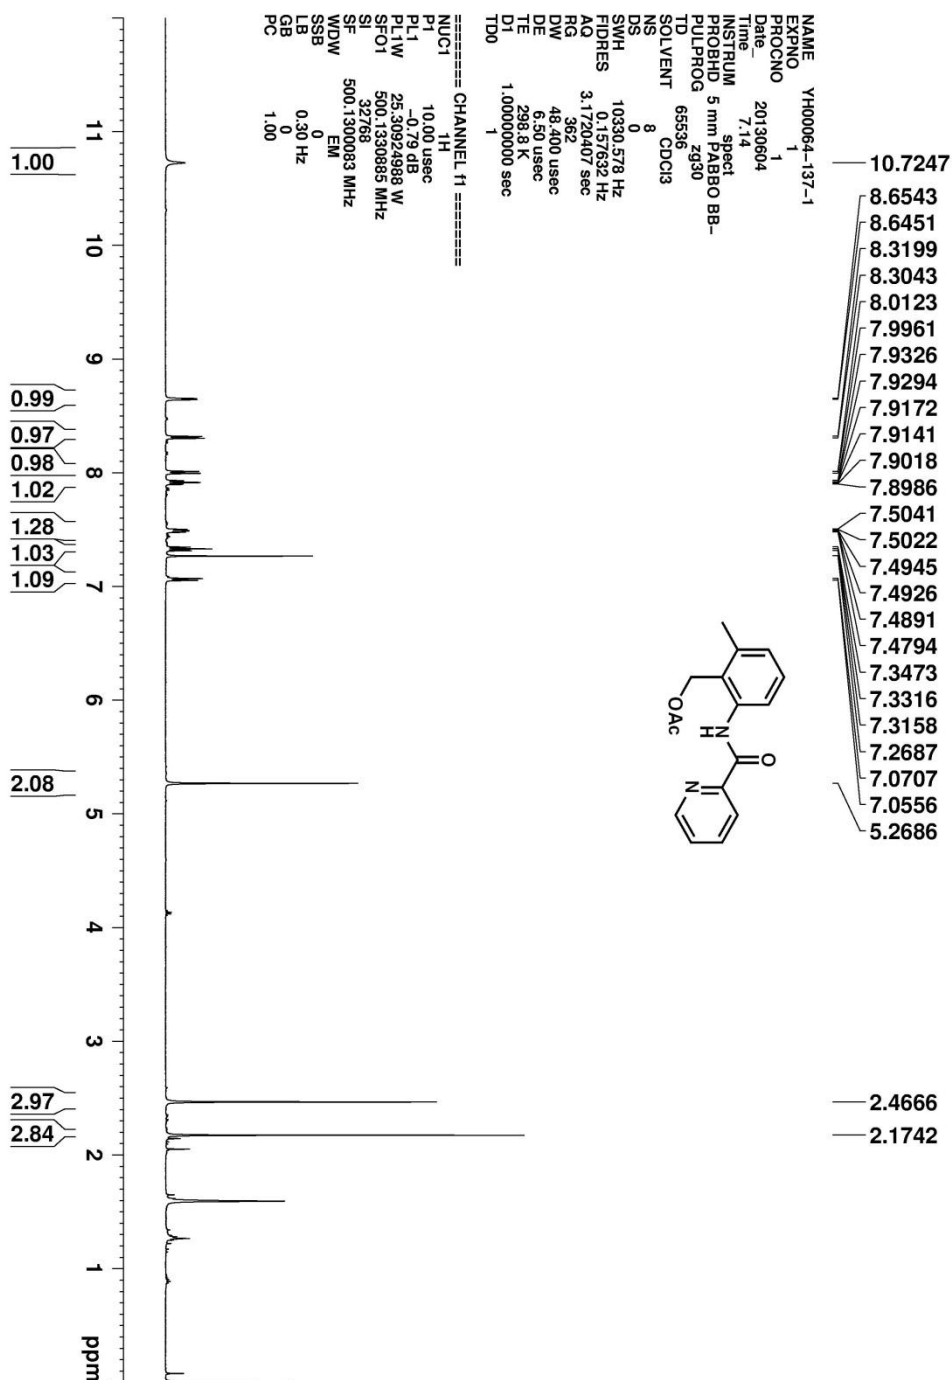

### Compound 2m (75MHz, CDCl<sub>3</sub>)

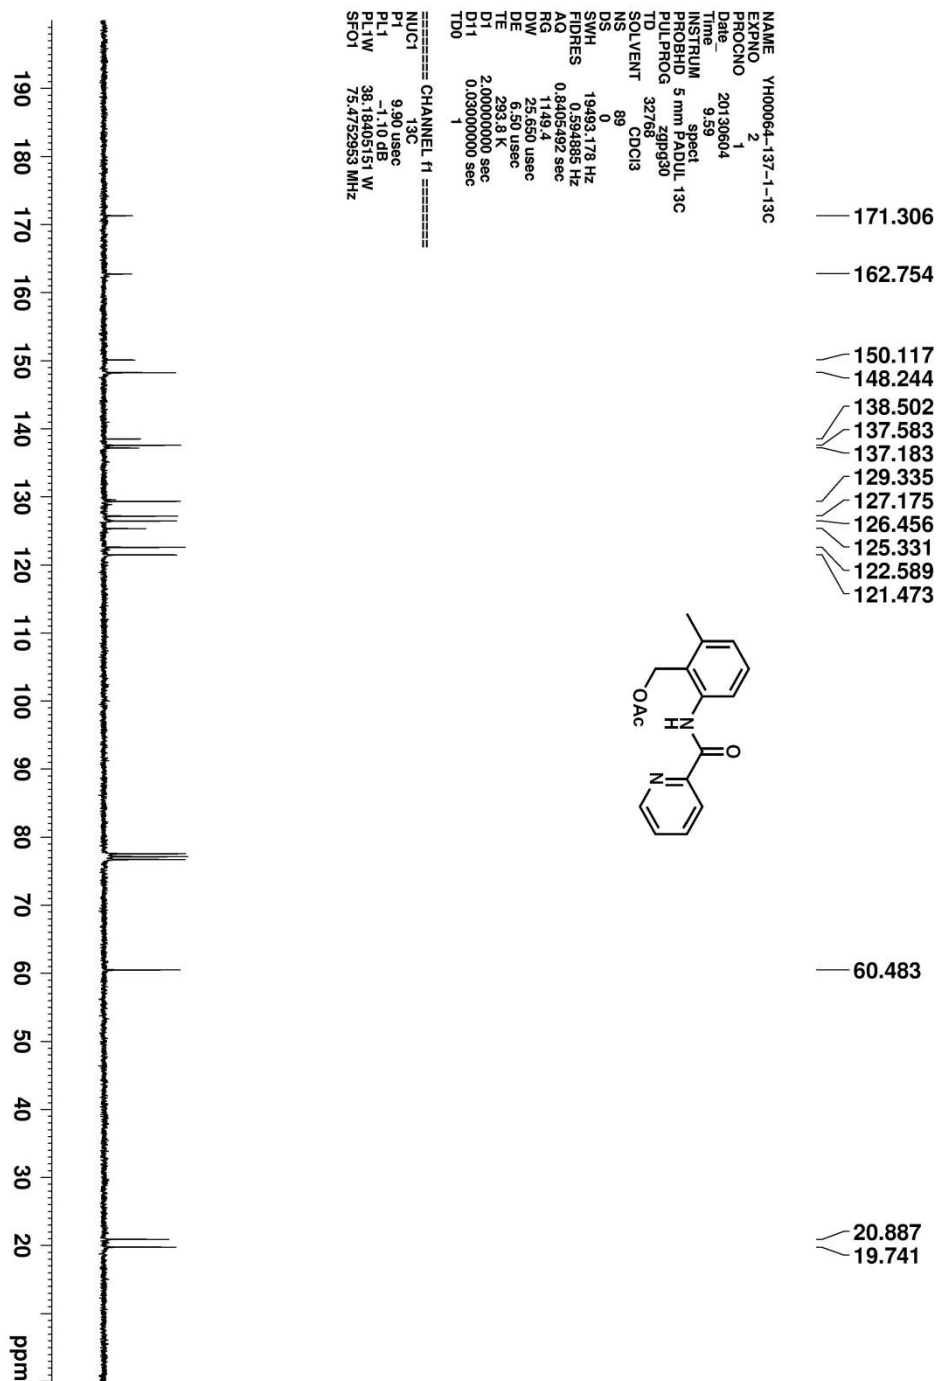

Compound 2n (500MHz, CDCl<sub>3</sub>)

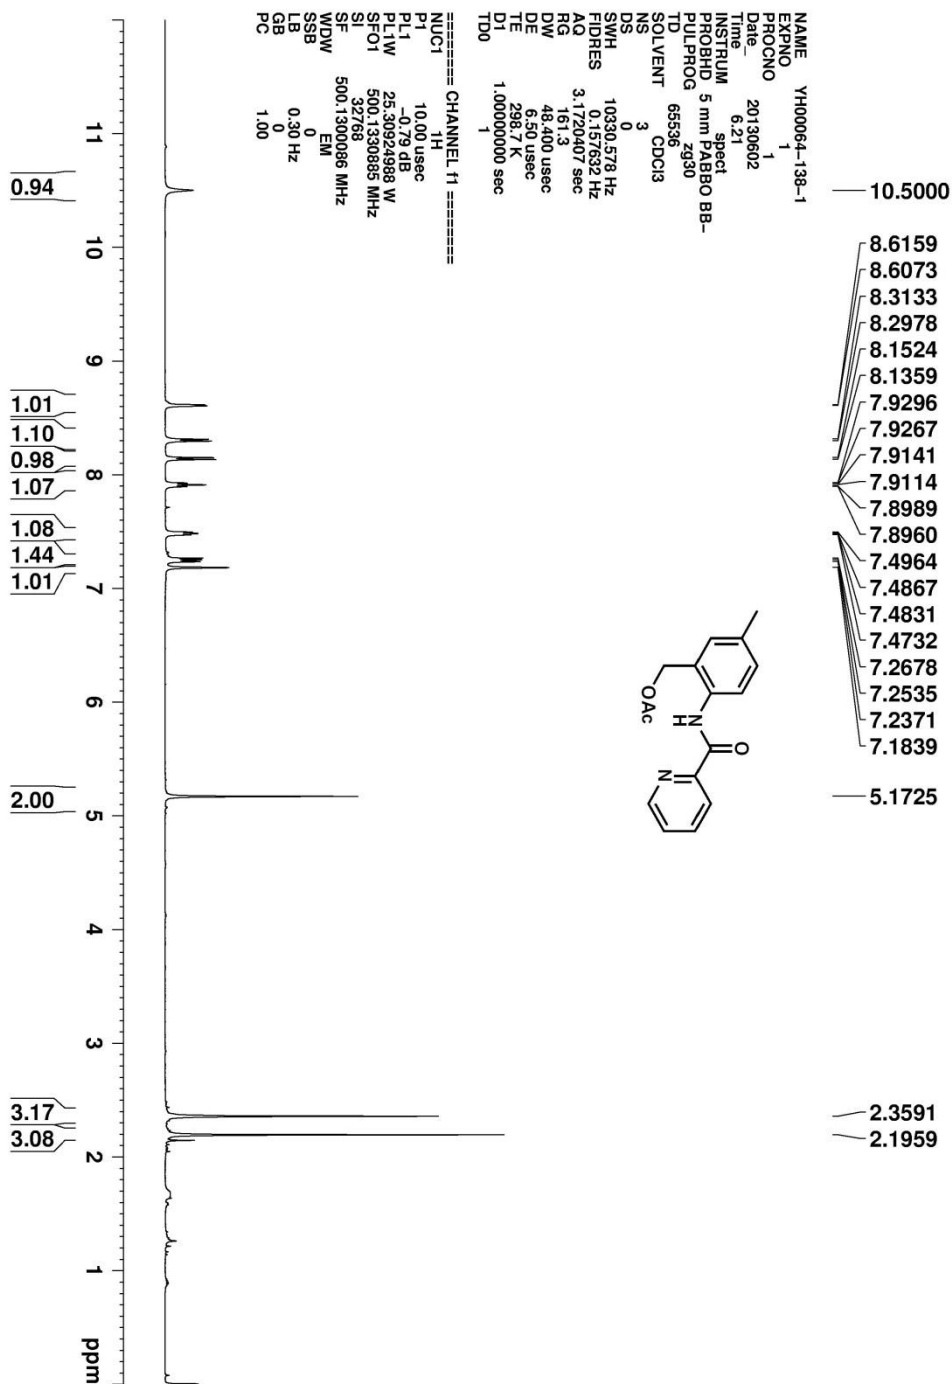

Compound 2n (125 MHz, CDCl<sub>3</sub>)

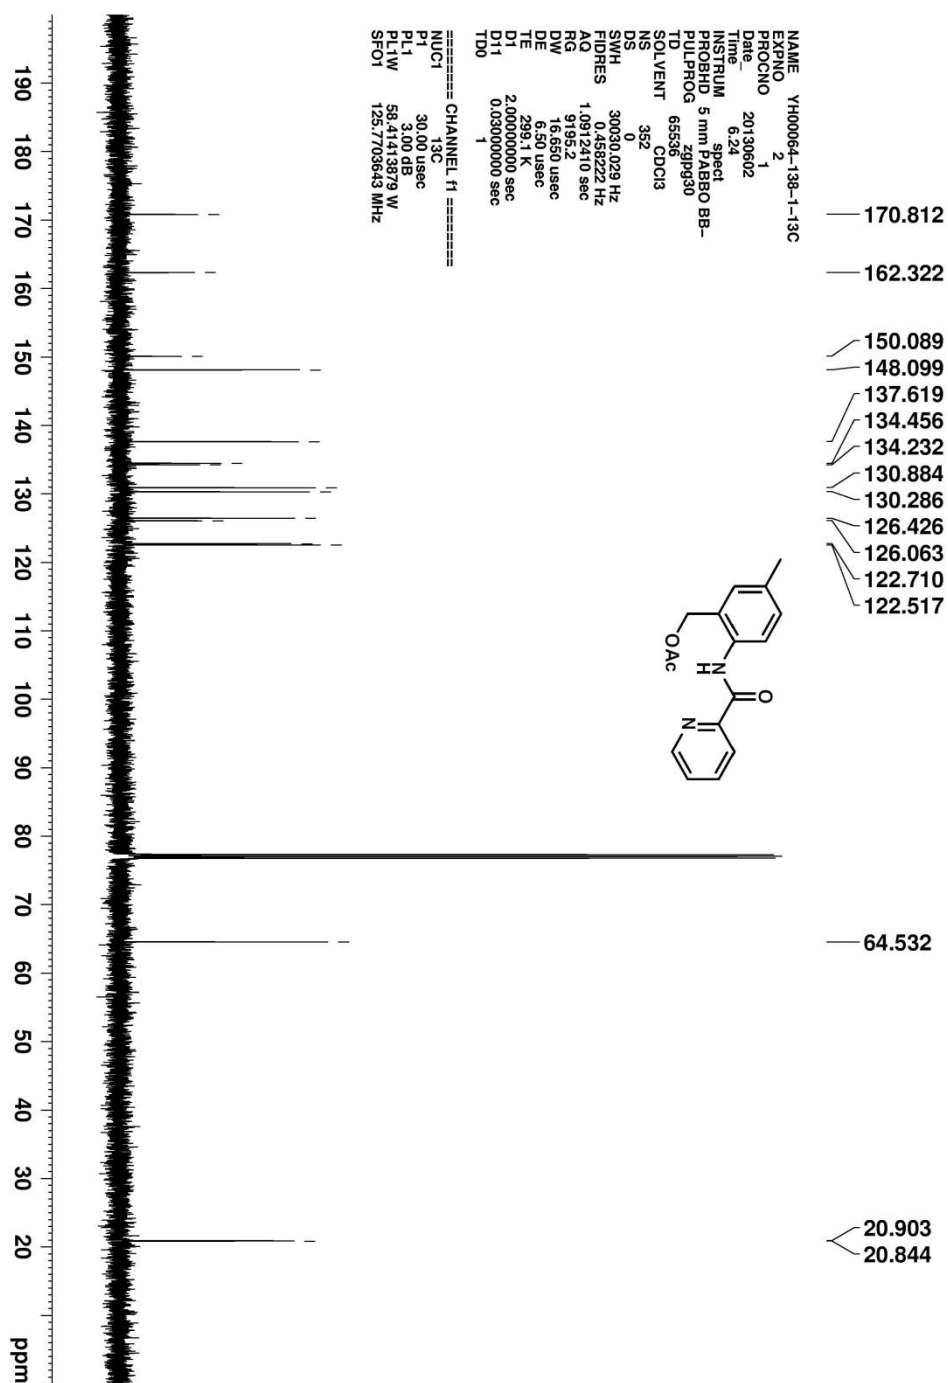



Compound 2o (400 MHz, CDCl<sub>3</sub>)

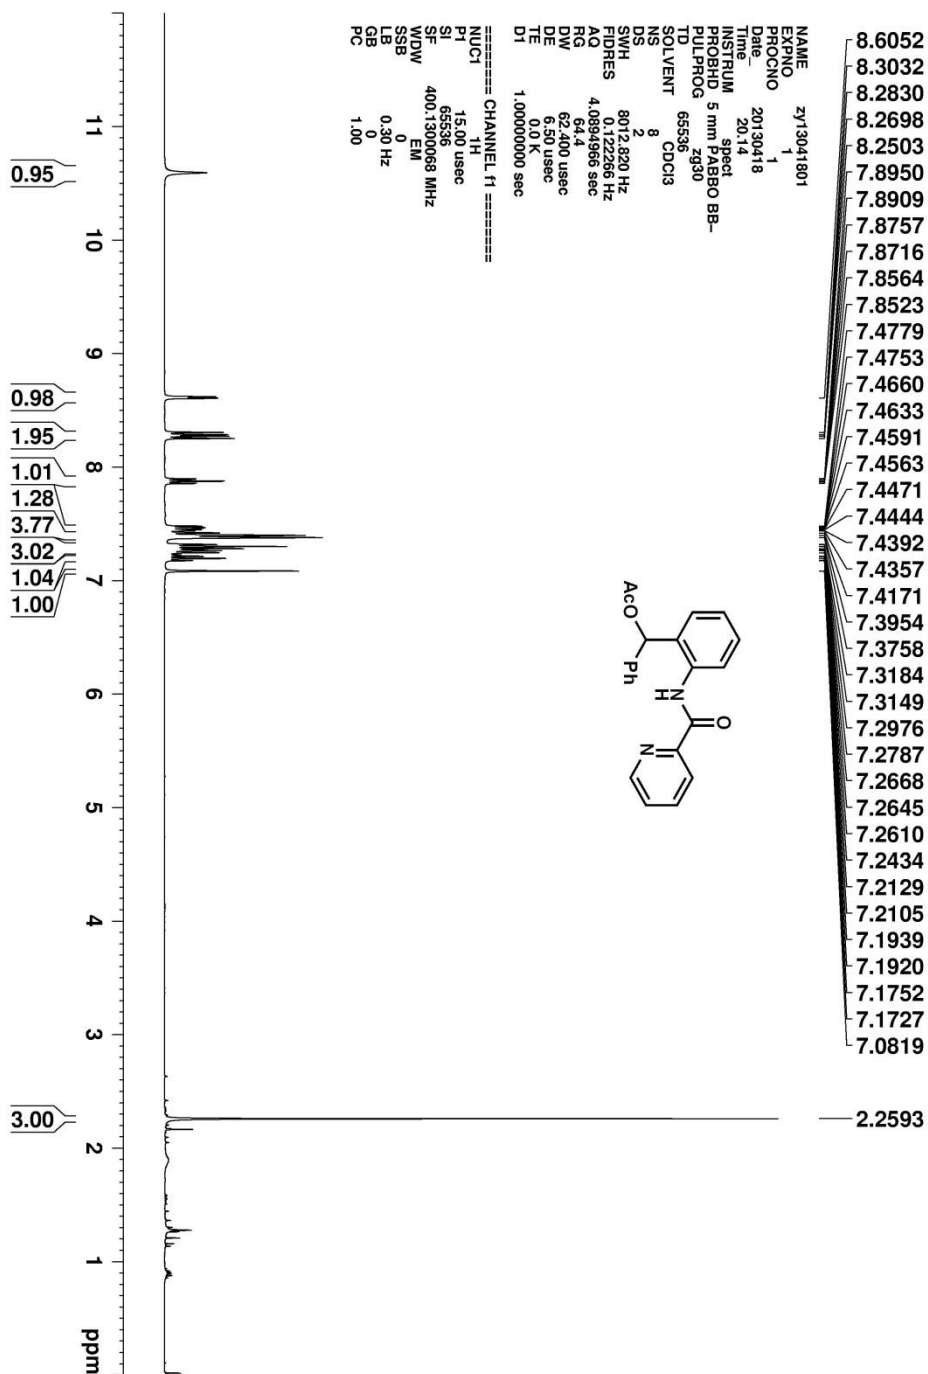

Compound 2o (100 MHz, CDCl<sub>3</sub>)

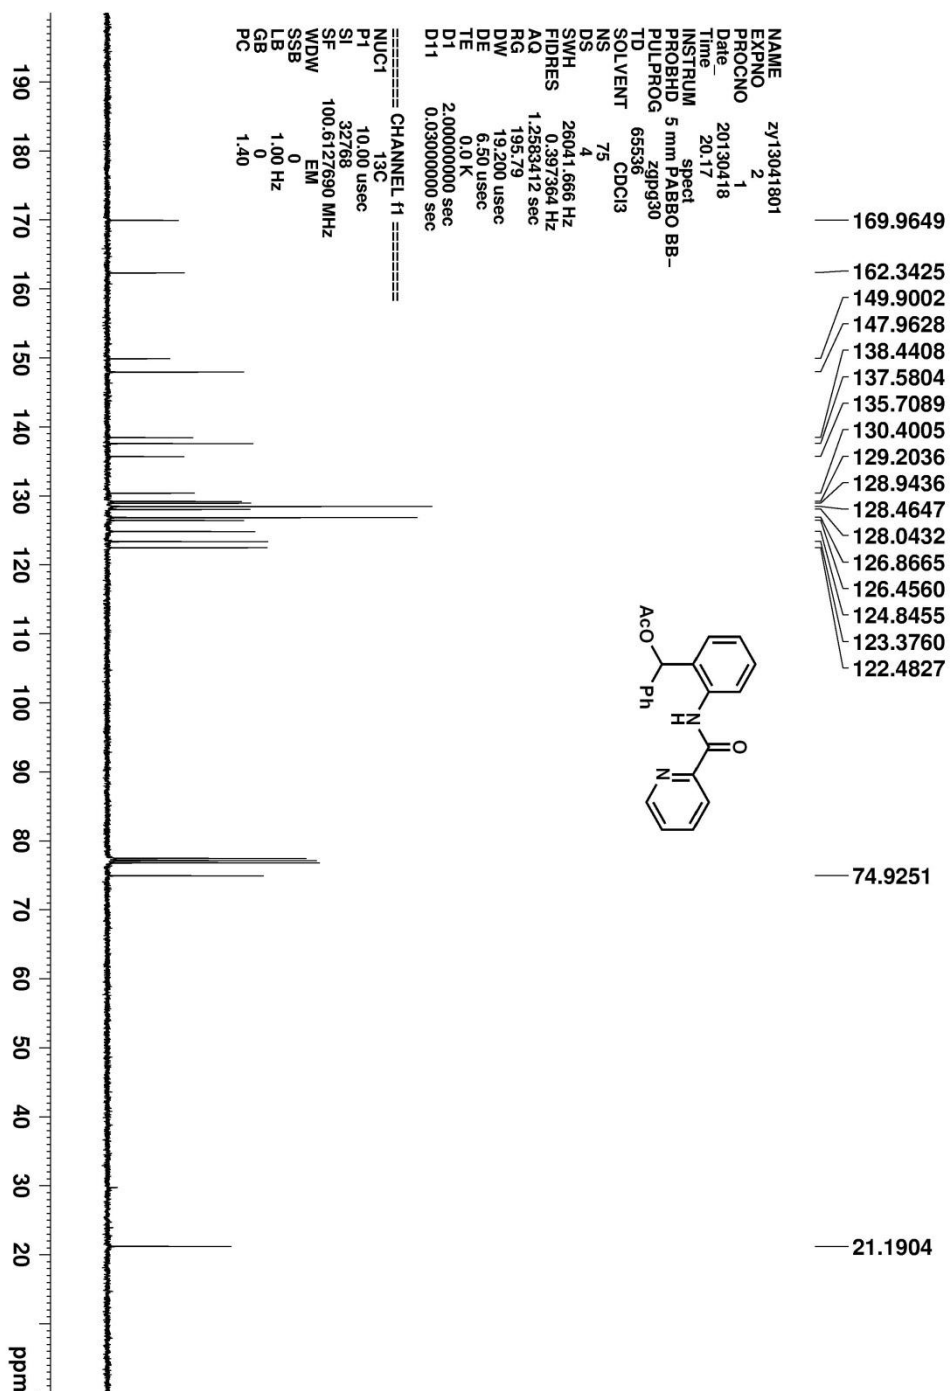

Compound 2p (400 MHz, CDCl<sub>3</sub>)

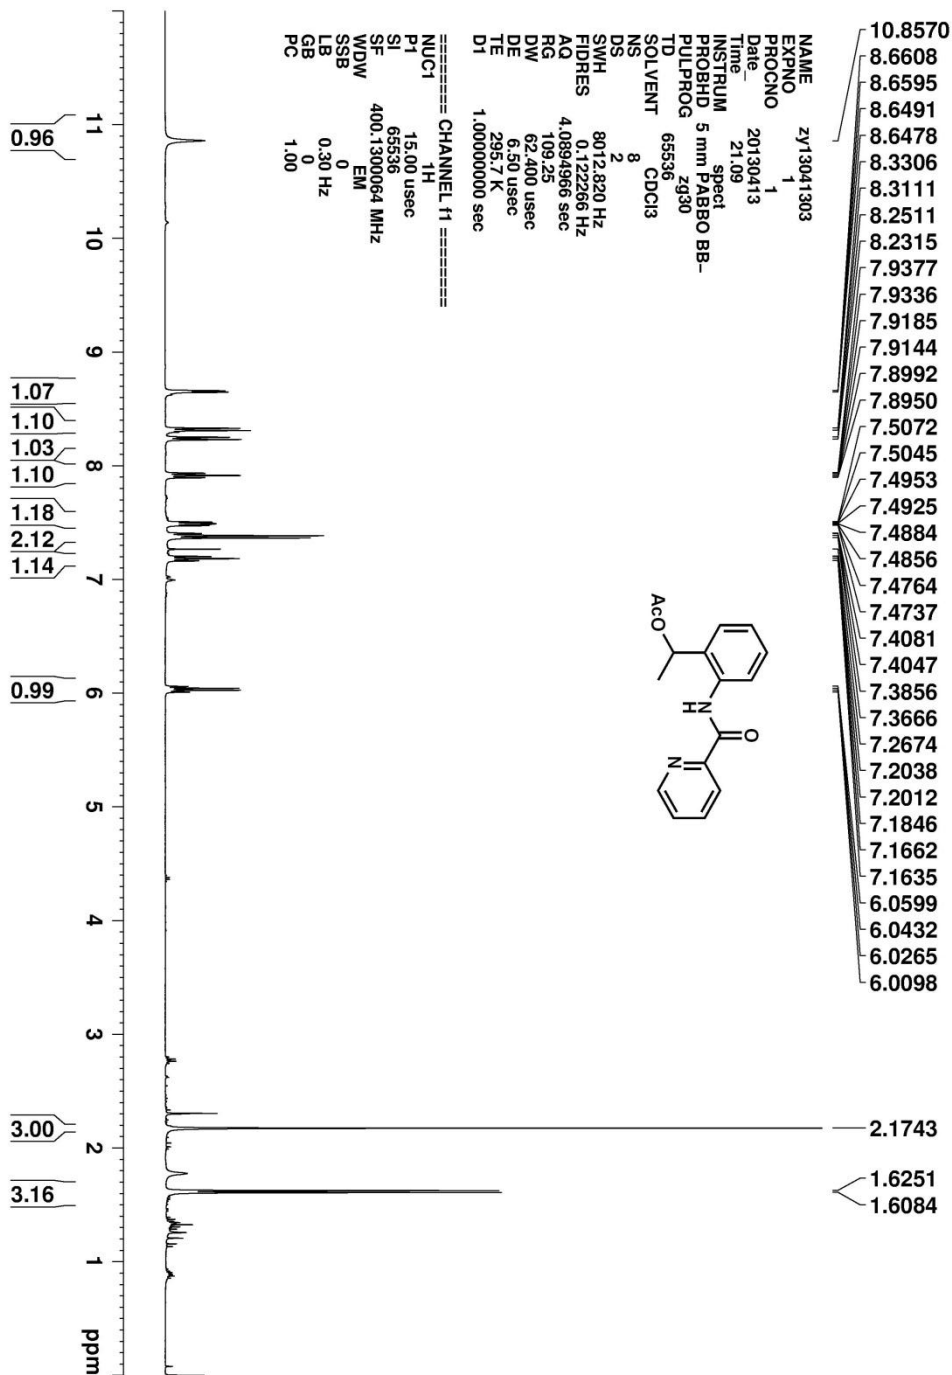

Compound 2p (100 MHz, CDCl<sub>3</sub>)

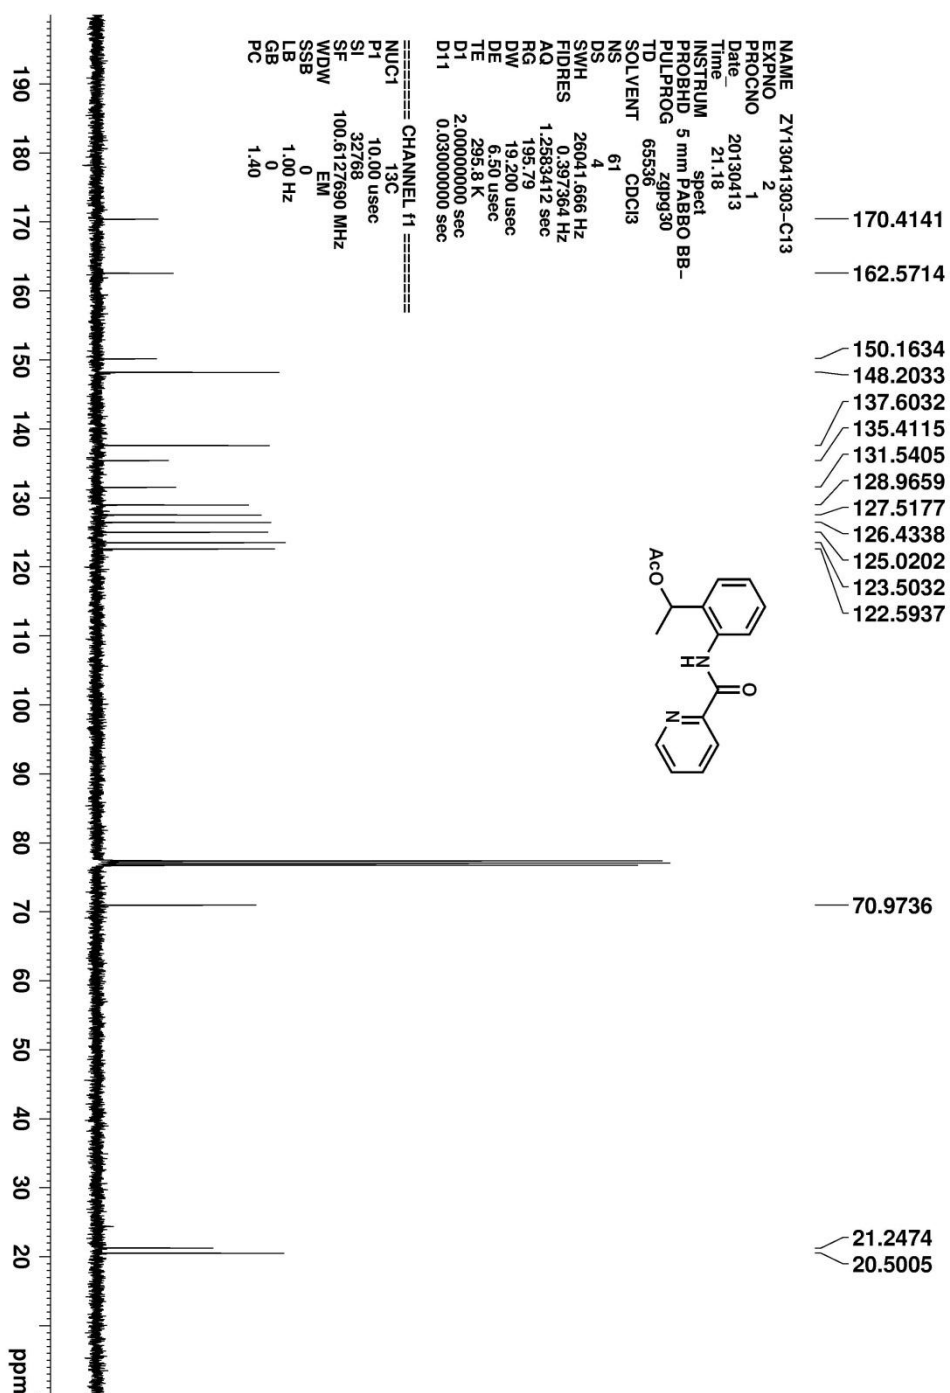

Compound 2q (300 MHz, CDCl<sub>3</sub>)

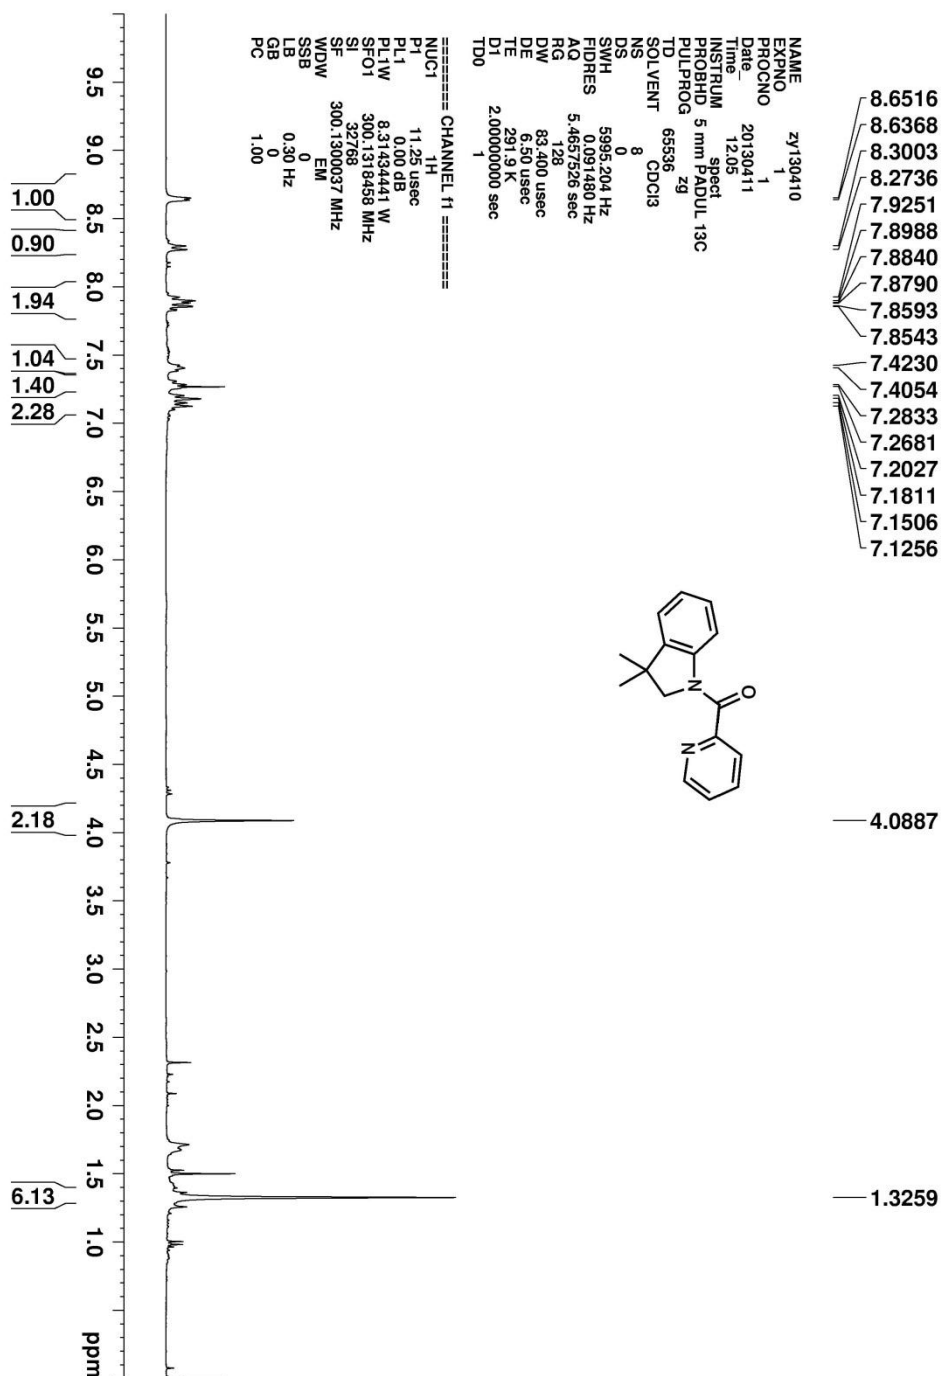

Compound 2q (75 MHz, CDCl<sub>3</sub>)

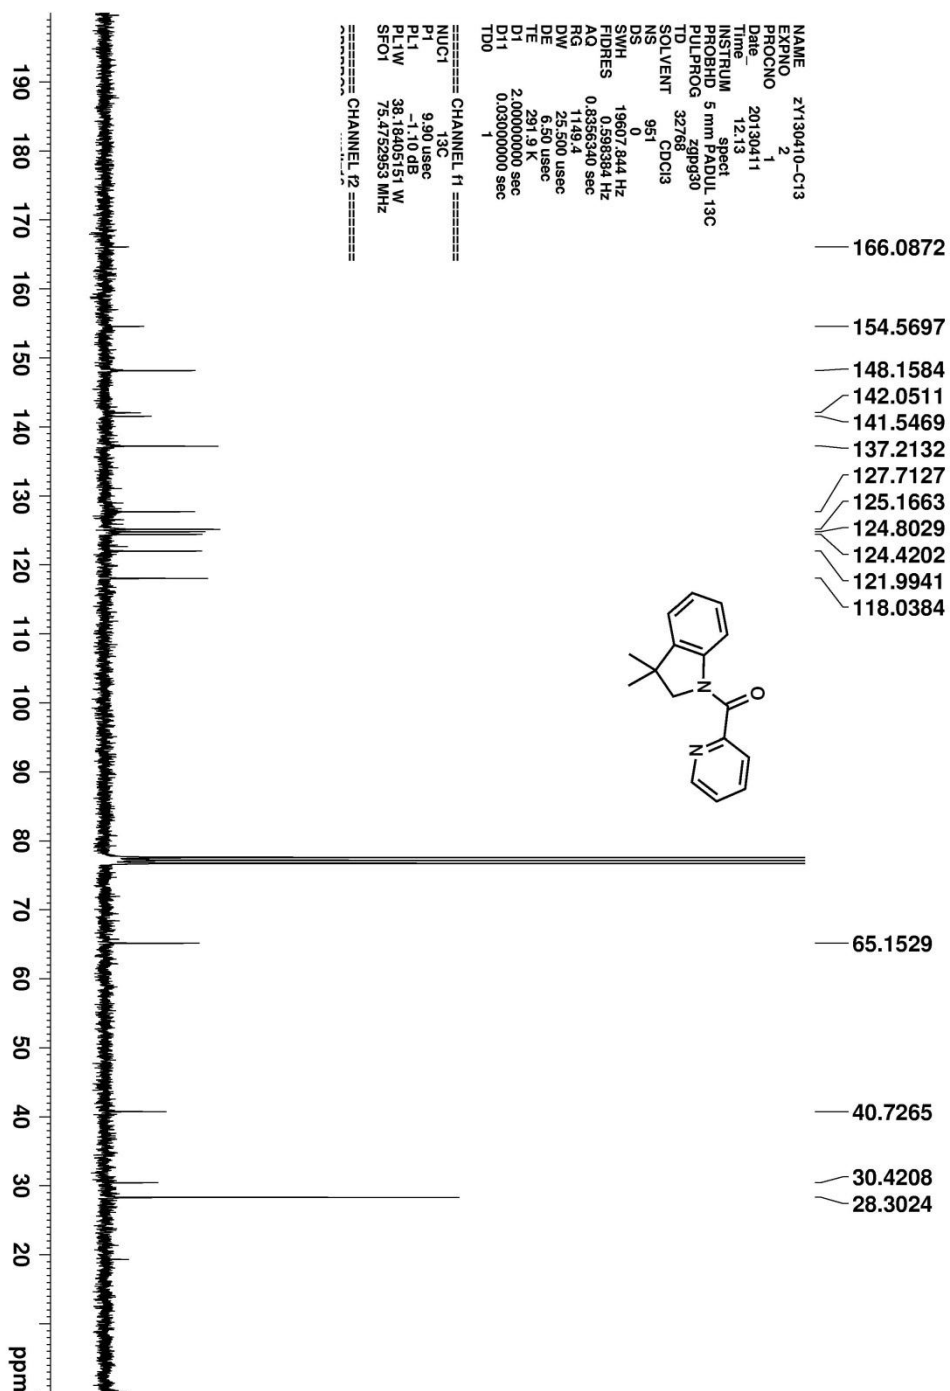

Compound 2r (500 MHz, CDCl<sub>3</sub>)

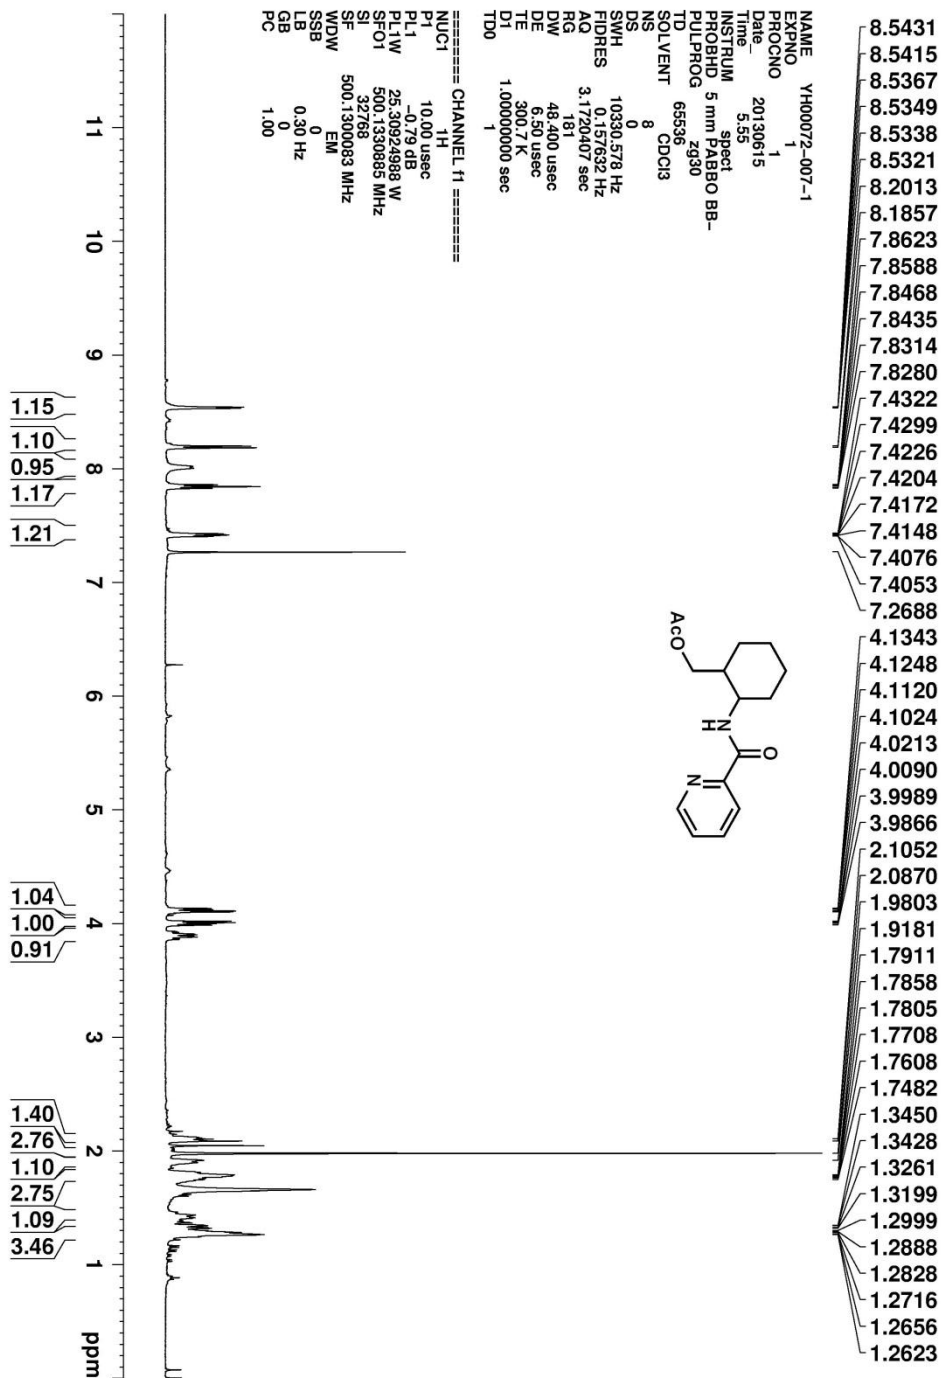

Compound 2r (75 MHz, CDCl<sub>3</sub>)

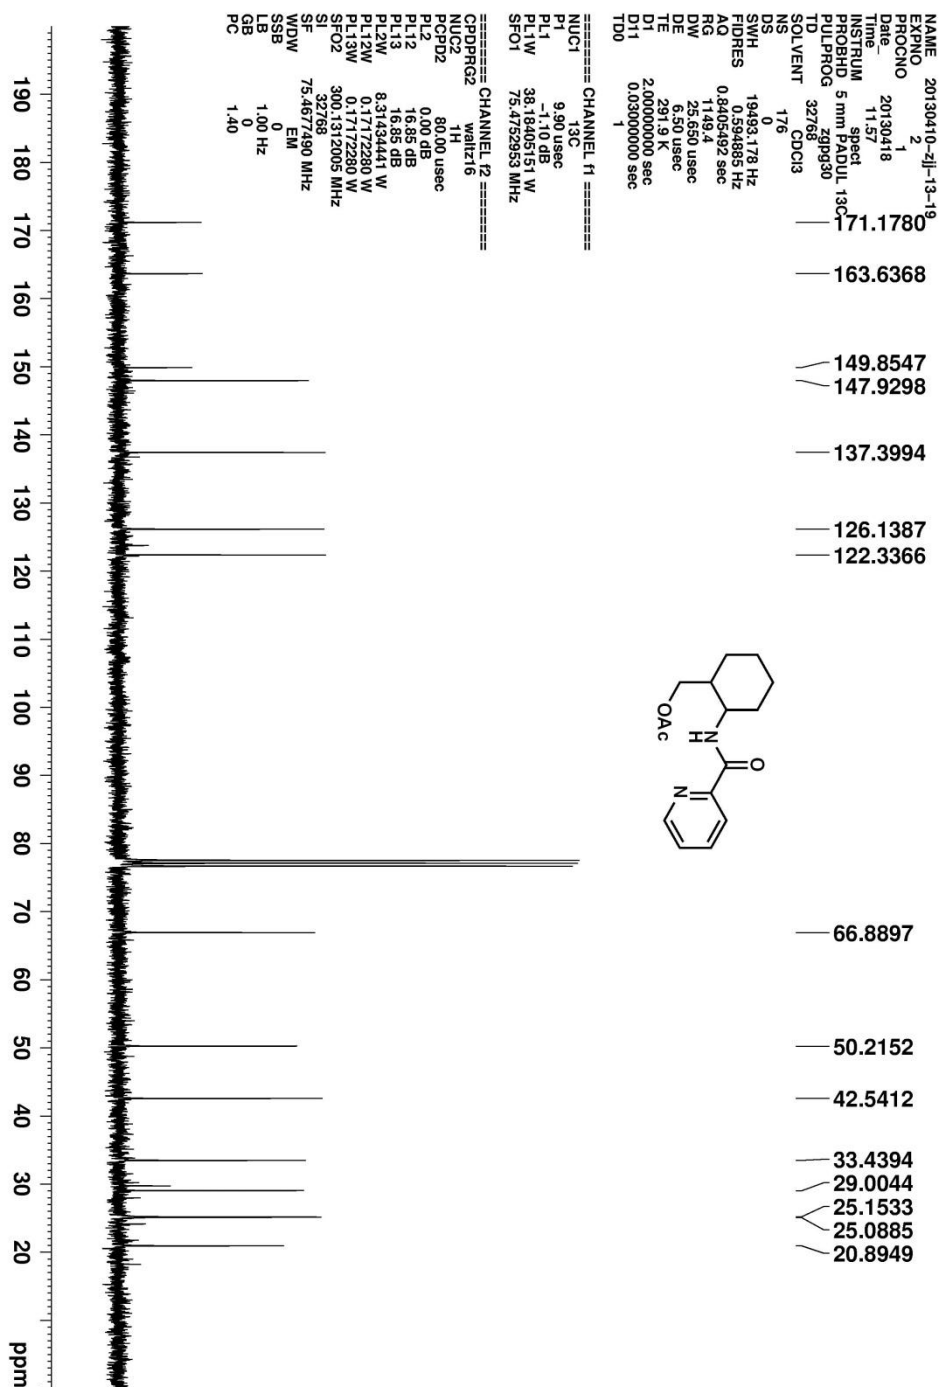



Compound 2s (500 MHz, CDCl<sub>3</sub>)

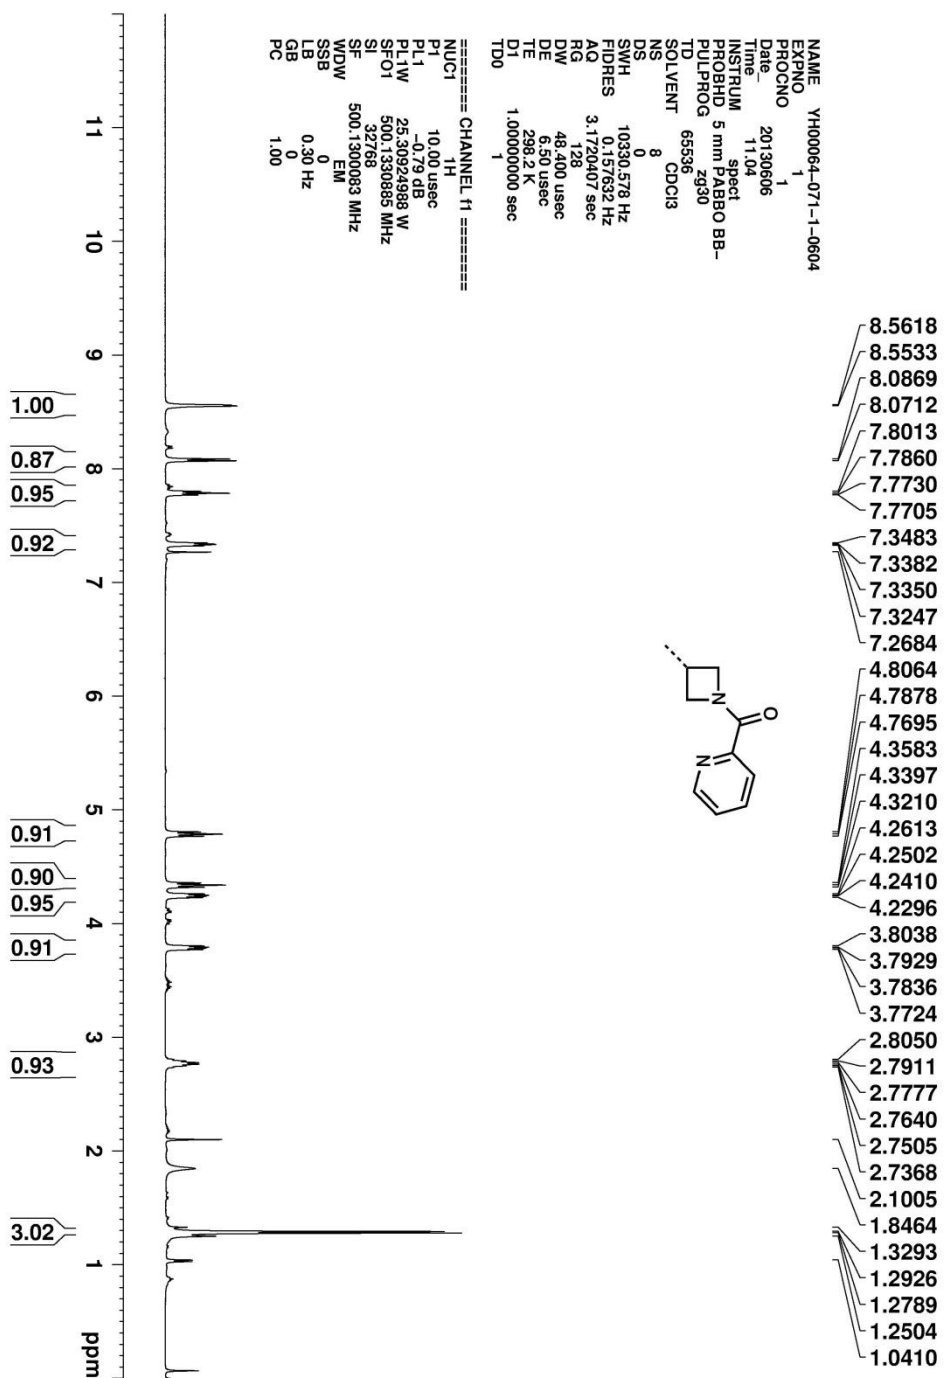

Compound 2s (75 MHz, CDCl<sub>3</sub>)

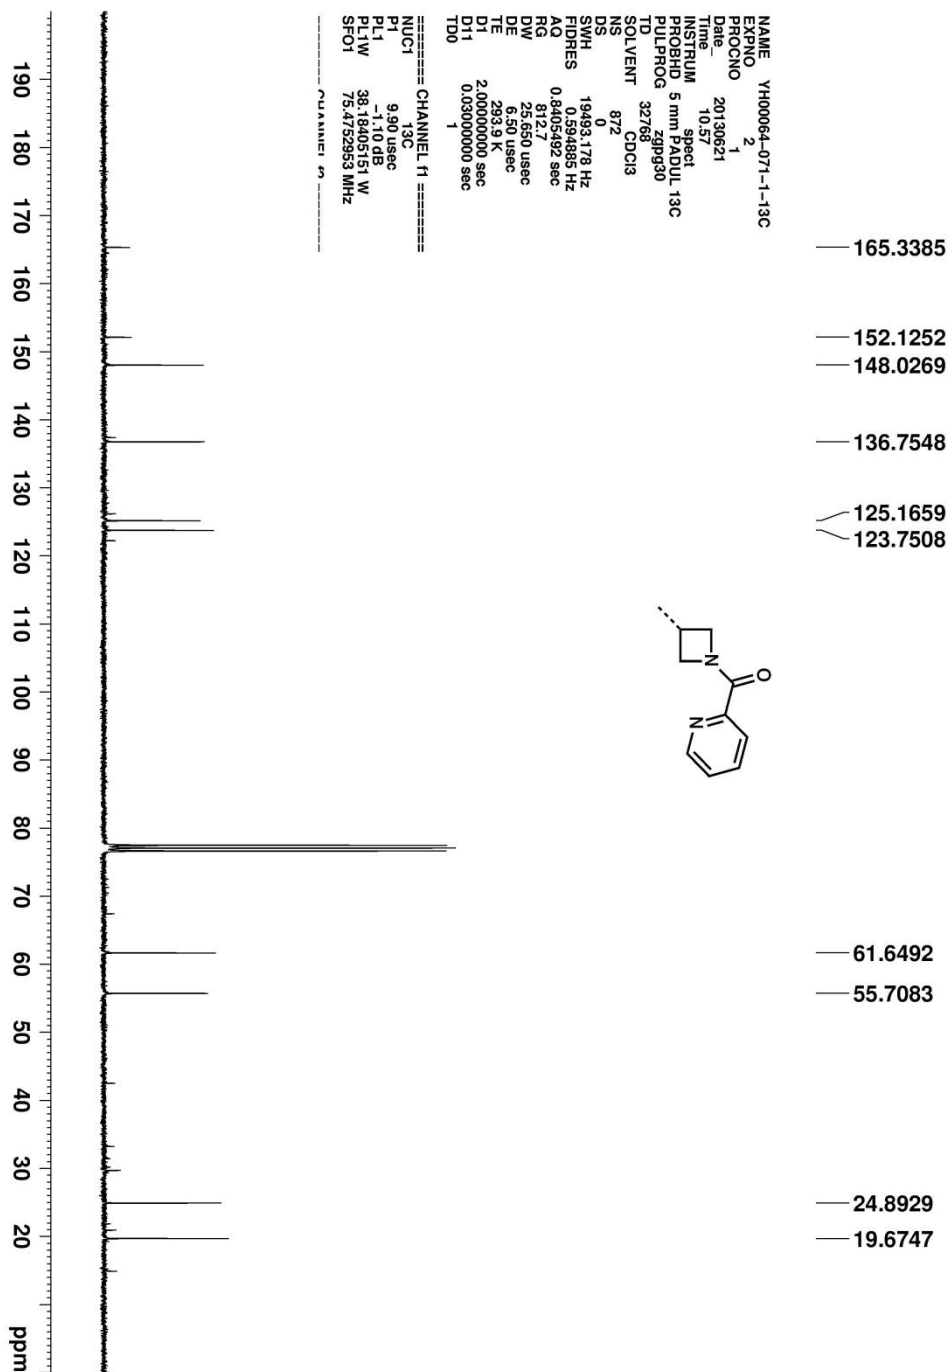

Compound *d*<sup>6</sup>-1j (500 MHz, CDCl<sub>3</sub>)

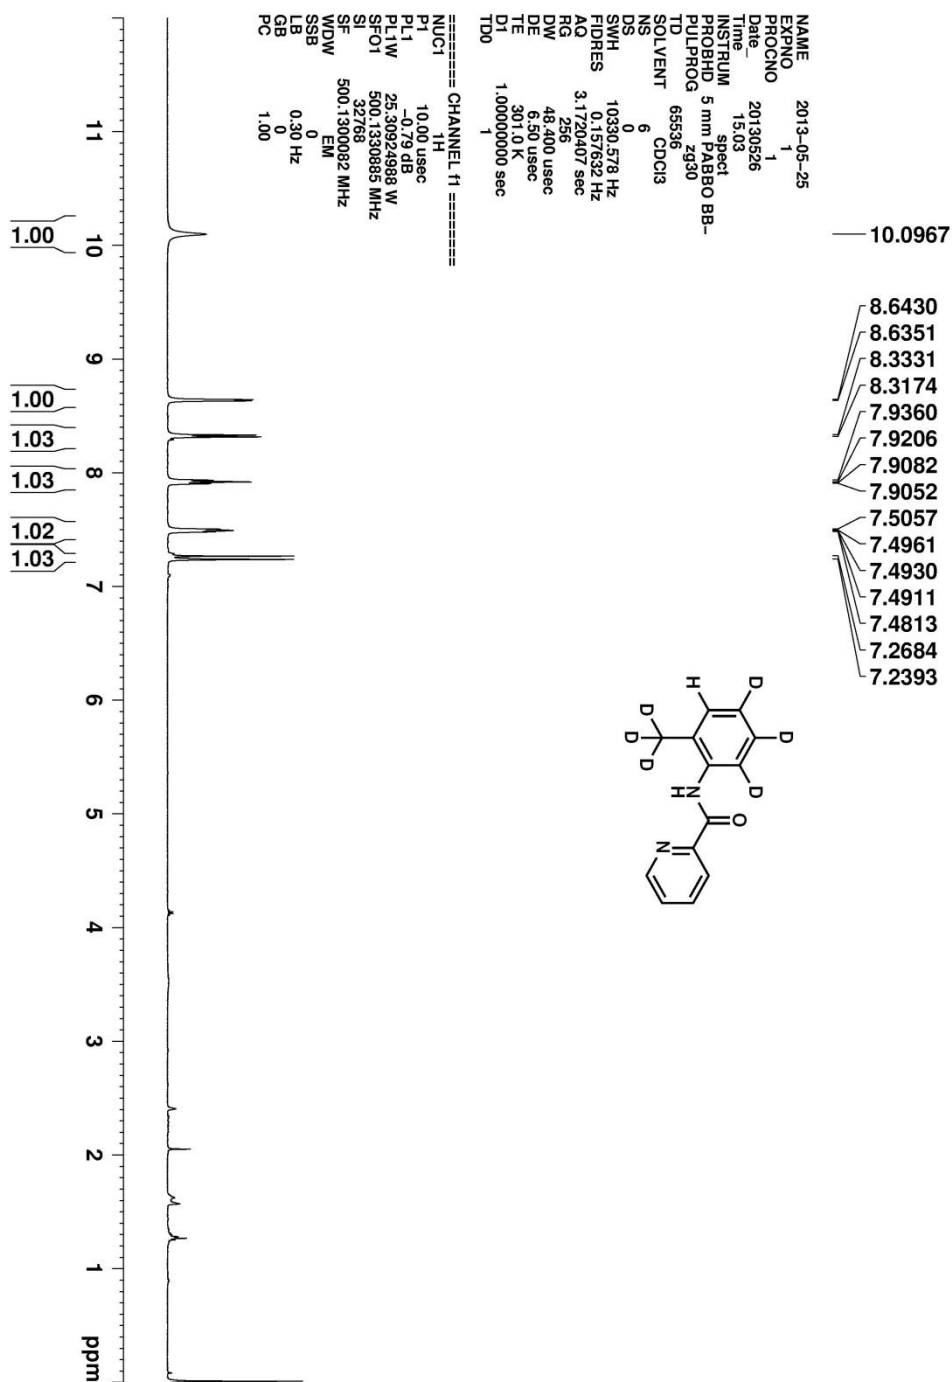

Compound *d*<sup>6</sup>-1j (125 MHz, CDCl<sub>3</sub>)

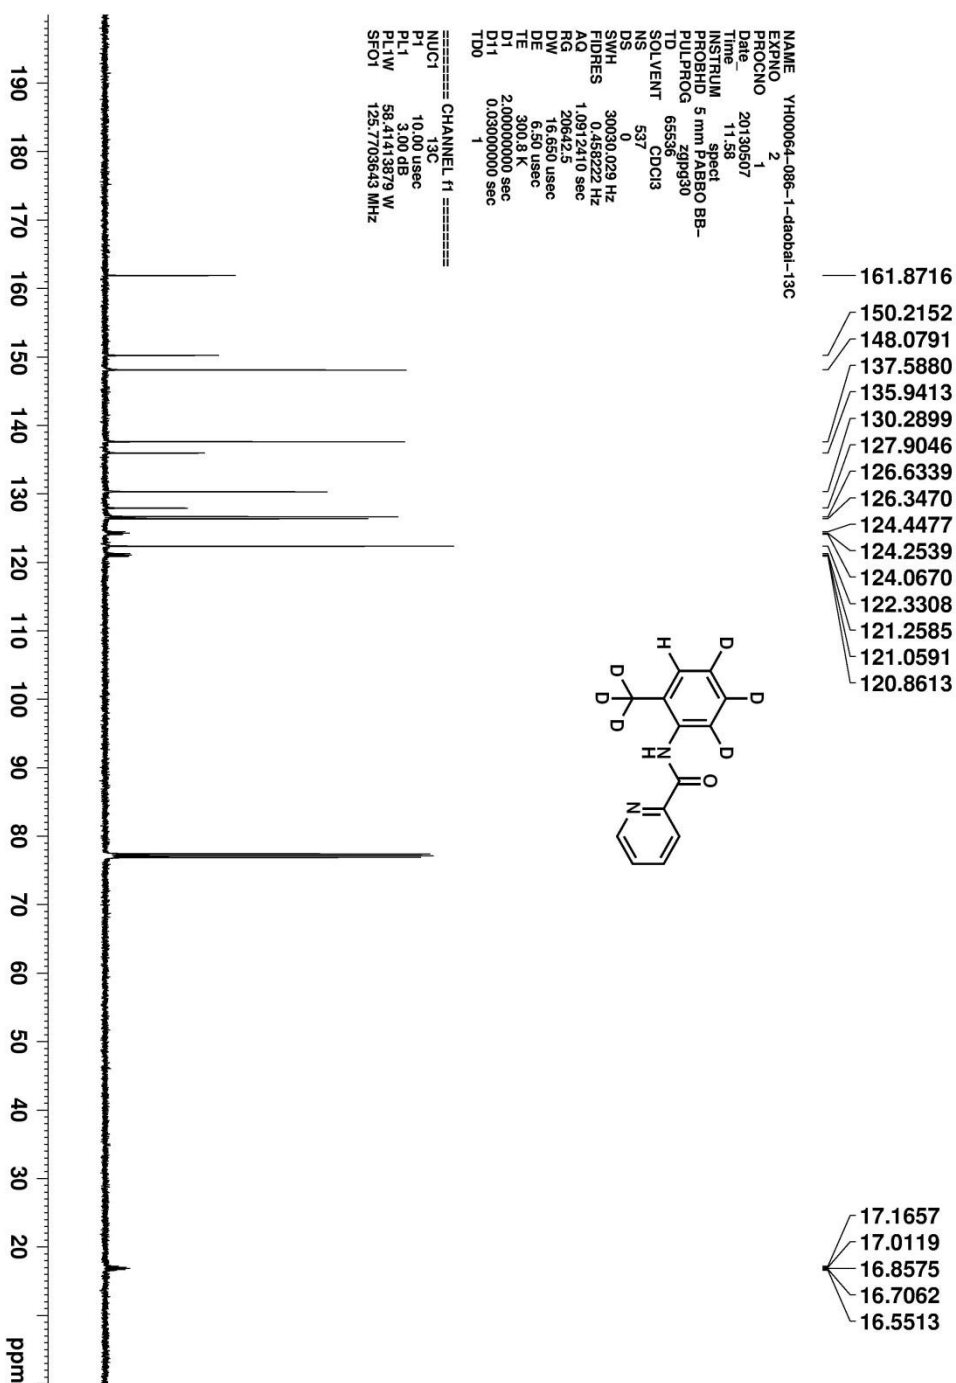

Compound 4a (500 MHz, CDCl<sub>3</sub>)

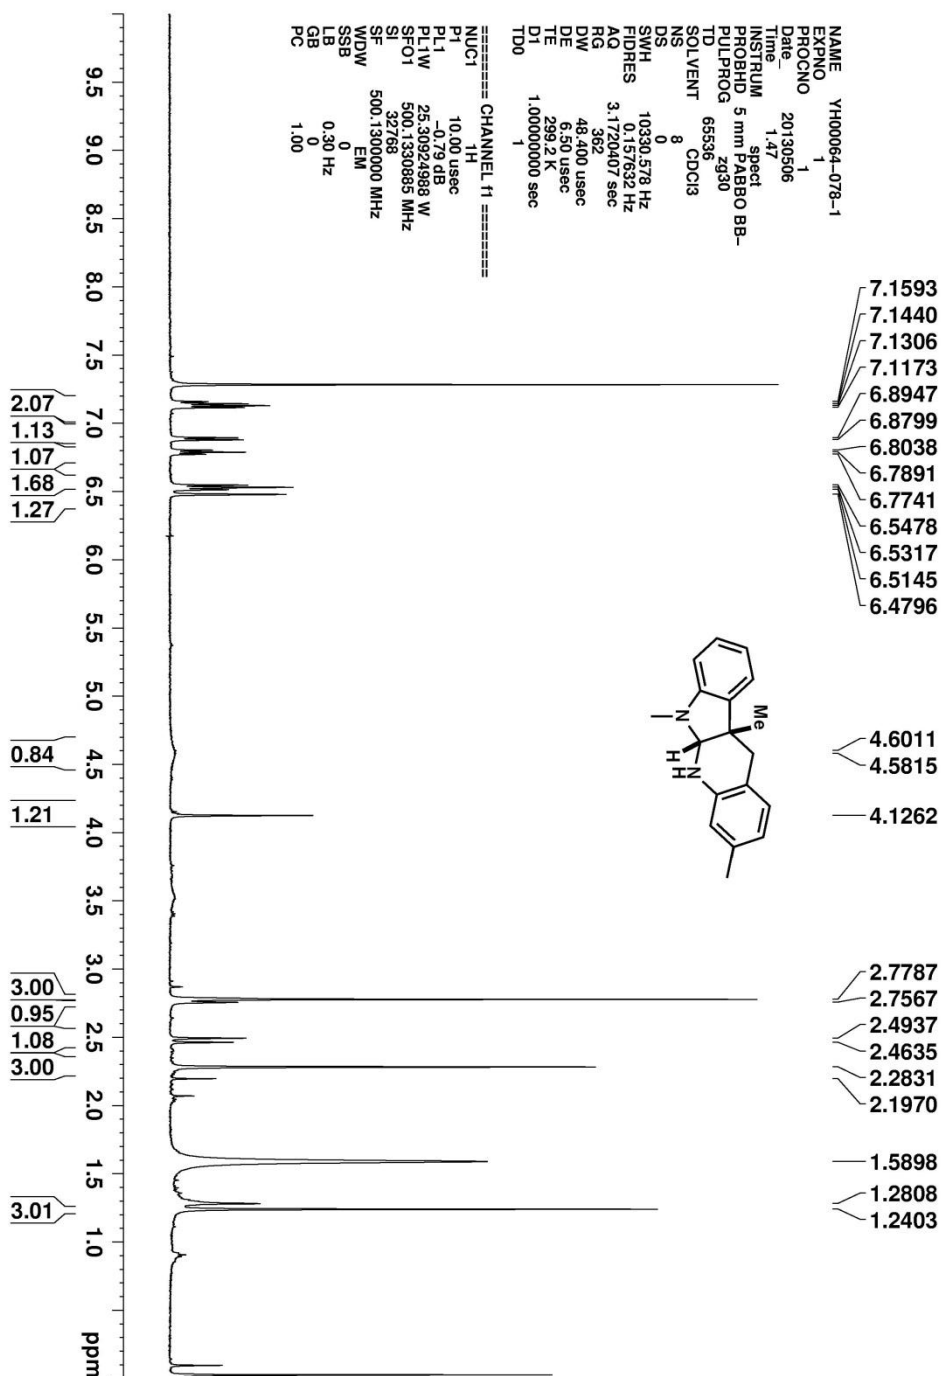

Compound 4a (100 MHz, CDCl<sub>3</sub>)

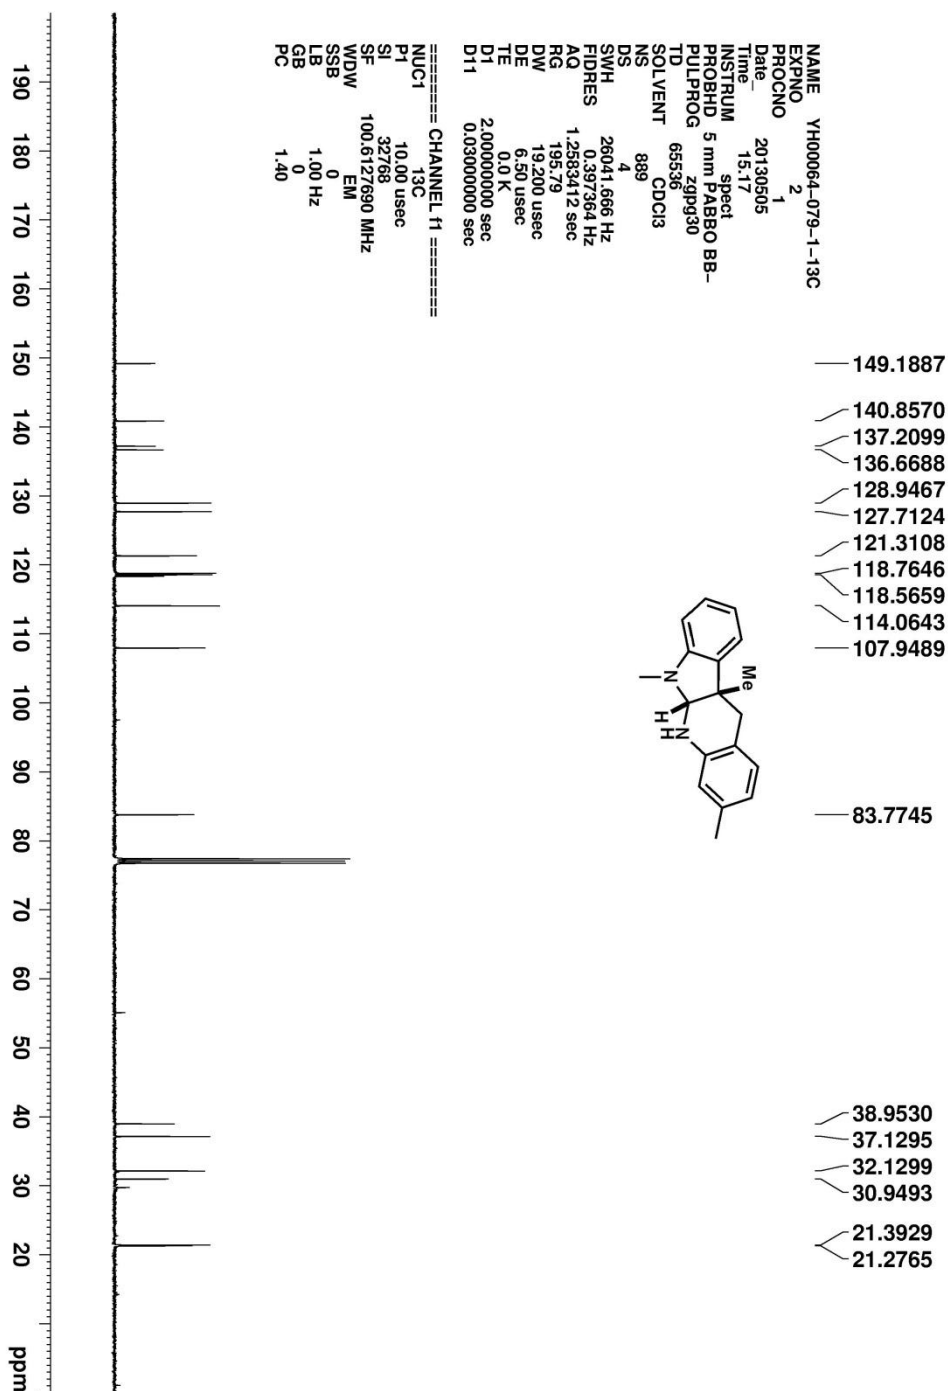

Compound 5a (500 MHz, CDCl<sub>3</sub>)

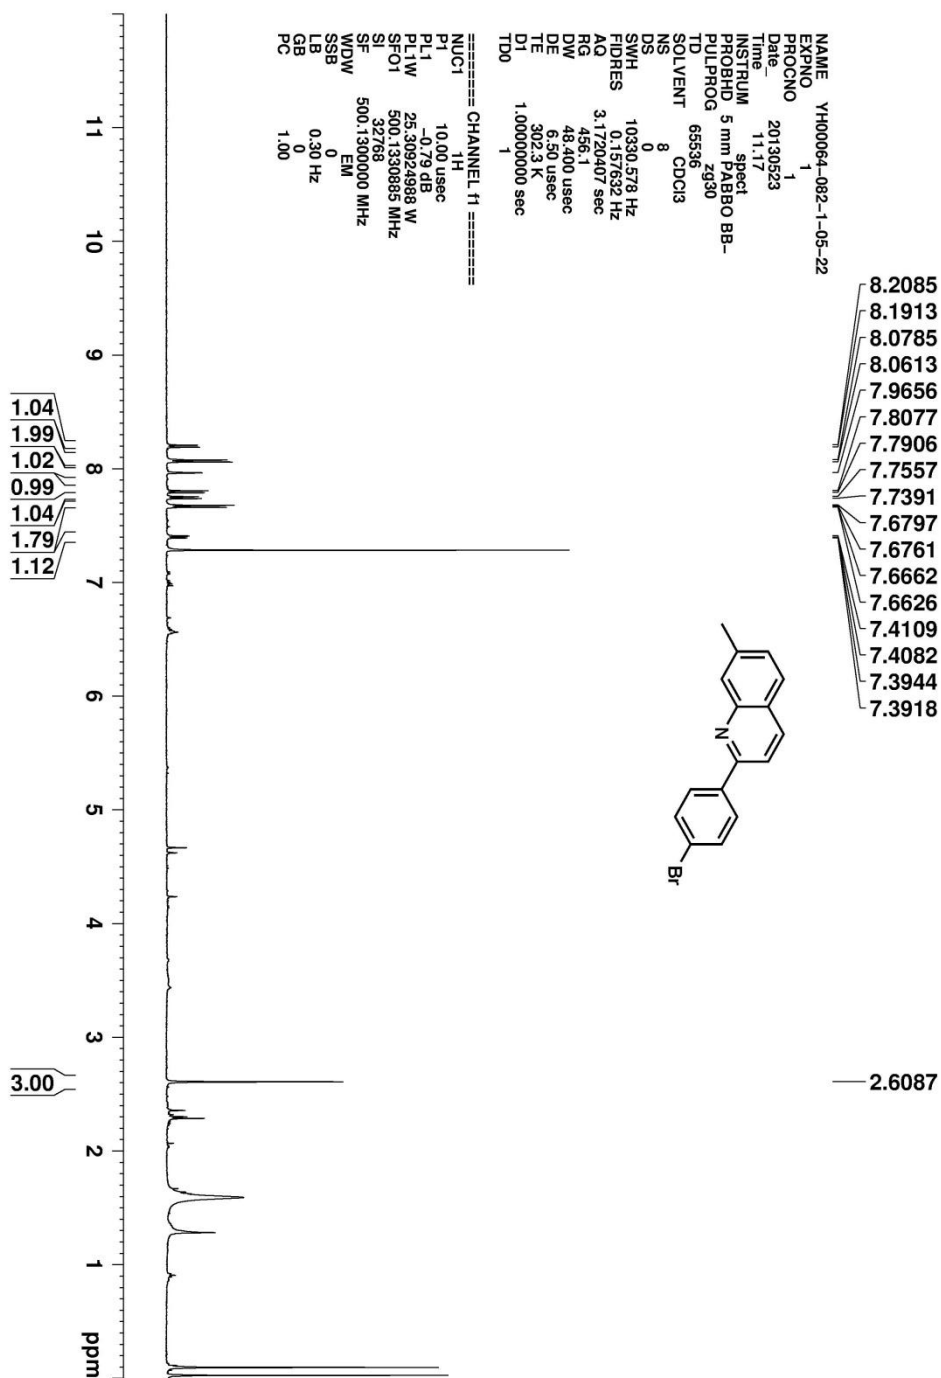

Compound 5a (125 MHz, CDCl<sub>3</sub>)

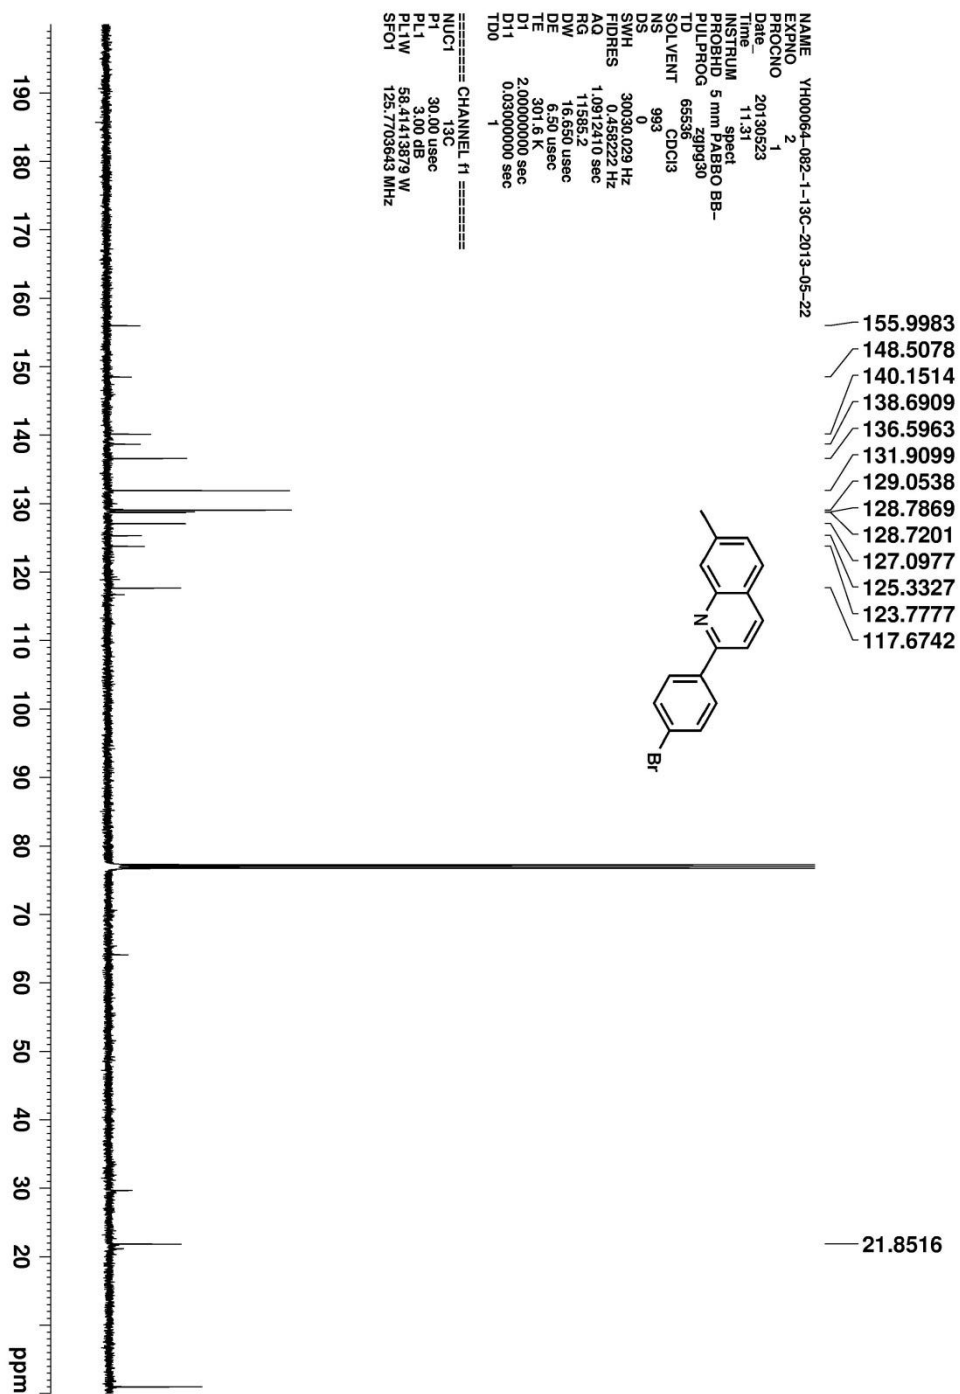



### Compound 6a (500 MHz, MeOD)

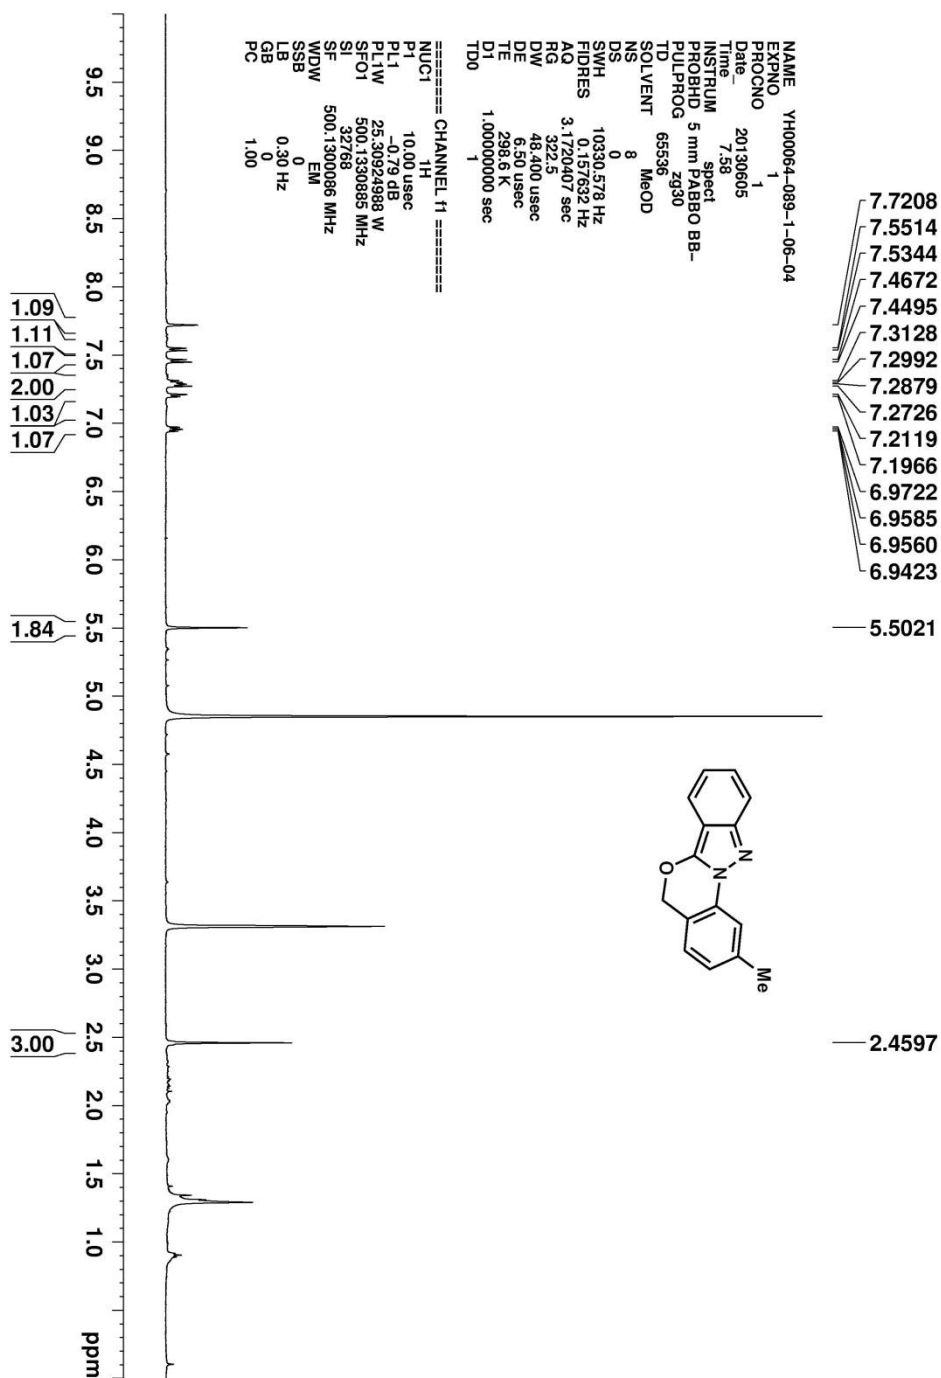

### Compound 6a (75 MHz, MeOD)

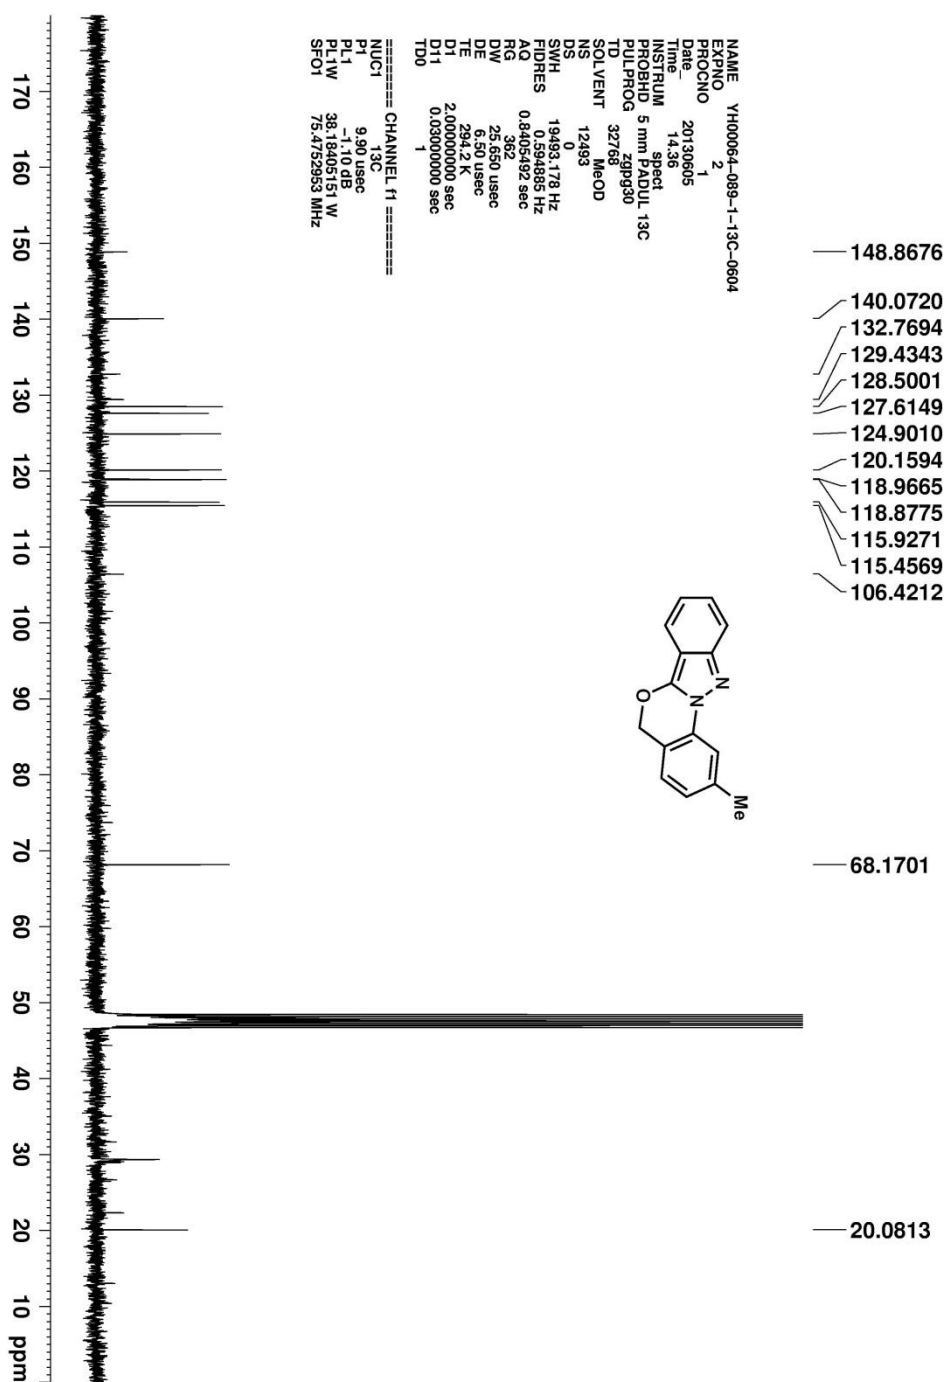

Supplement: c3ob42196a.pdf [file c3ob42196a.pdf]
